# Supplementary material for: Haptophyte-infecting viruses change the genome condensing proteins of dinoflagellates
Source: Commun Biol. 2025 Mar 28;8:510. doi: 10.1038/s42003-025-07905-3 (PMC11953307; doi:10.1038/s42003-025-07905-3)
Supplement: Supplementary file 3 — Supplementary Data 1 [file 42003_2025_7905_MOESM3_ESM.xlsx]

## Sheet: HeV-RF02
ORF	Description	E-value	Annotation	Functional distribution	Biological process	Organism	Taxonomy	Origin	SP	SP_start	SP_end	TM	NCLDVs	All-to-all blastp	Core genes
ORF1	gene_1|GeneMark.hmm|335_aa|-|2|1006	0.22	predicted protein	Unknown				ORFan
ORF2	gene_2|GeneMark.hmm|40_aa|-|1130|1252	0 hits	predicted protein	Unknown				ORFan
ORF3	gene_3|GeneMark.hmm|70_aa|+|1244|1456	5.6	predicted protein	Unknown				ORFan
ORF4	gene_4|GeneMark.hmm|540_aa|-|1556|3178	5.7	predicted protein	Unknown				ORFan
ORF5	gene_5|GeneMark.hmm|194_aa|+|3405|3989	7e-29	hypothetical protein	Unknown		Tokyovirus A1	unclassified Marseillevirus	Virus
ORF6	gene_6|GeneMark.hmm|299_aa|-|3964|4863	5e-98	site-specific DNA methyltransferase	Resistance	Restriction-modification system	Yellowstone lake mimivirus	unclassified Mimiviridae	Virus
ORF7	gene_7|GeneMark.hmm|191_aa|-|5028|5603	3	lipid-sensing domain protein	Vesicle trafficking				ORFan				7
ORF8	gene_8|GeneMark.hmm|328_aa|-|5775|6761	3e-06	hypothetical protein	Unknown		Lysobacter antibioticus 76	Lysobacter	Bacteria
ORF9	gene_9|GeneMark.hmm|758_aa|-|6758|9034	1e-10	hypothetical protein	Unknown		Callorhinchus milii	elephant shark	Eukaryotes
ORF10	gene_10|GeneMark.hmm|505_aa|-|9229|10746	0 hits	predicted protein	Unknown				ORFan
ORF11	gene_11|GeneMark.hmm|58_aa|-|10964|11140	8.5	predicted protein	Unknown				ORFan	1	1	25
ORF12	gene_12|GeneMark.hmm|127_aa|-|11400|11783	0.85	predicted protein	Unknown				ORFan				3
ORF13	gene_13|GeneMark.hmm|183_aa|+|11807|12358	0.002	predicted protein	Unknown		Electrophorus electricus (electric eel 电鳗)		ORFan				4
ORF14	gene_14|GeneMark.hmm|75_aa|-|12636|12863	0.99	predicted protein	Unknown				ORFan
ORF15	gene_15|GeneMark.hmm|33_aa|-|12913|13014	0 hits	predicted protein	Unknown				ORFan
ORF16	gene_16|GeneMark.hmm|111_aa|+|13090|13425	2e-37	Fe-S cluster assembly scaffold protein	Metabolism	Respiration chain; Fe-S cluster biosynthesis	Chrysochromulina ericina virus	unclassified Phycodnaviridae	Virus
ORF17	gene_17|GeneMark.hmm|282_aa|-|13487|14335	4e-127	hypothetical protein	Unknown		Emiliania huxleyi	algae	Eukaryotes	1	1	12
ORF18	gene_18|GeneMark.hmm|583_aa|-|14392|16143	1e-08	hypothetical protein	Unknown		Phaeocystis globosa virus	unclassified Prymnesiovirus	Virus
ORF19	gene_19|GeneMark.hmm|54_aa|-|16207|16371	0 hits	predicted protein	Unknown				ORFan
ORF20	gene_20|GeneMark.hmm|332_aa|+|16453|17451	3e-72	hypothetical protein	Unknown		Phaeocystis globosa virus	unclassified Prymnesiovirus	Virus
ORF21	gene_21|GeneMark.hmm|82_aa|+|17548|17796	2.2	predicted protein	Unknown				ORFan				1
ORF22	gene_22|GeneMark.hmm|223_aa|-|17899|18570	0.19	predicted protein	Unknown				ORFan
ORF23	gene_23|GeneMark.hmm|562_aa|-|18624|20312	8e-05	hypothetical protein	Unknown		Phaeocystis globosa virus	unclassified Prymnesiovirus	Virus
ORF24	gene_24|GeneMark.hmm|297_aa|-|20720|21613	0.13	predicted protein	Unknown				ORFan
ORF25	gene_25|GeneMark.hmm|78_aa|+|21734|21970	6e-26	hypothetical protein	Unknown		Chrysochromulina ericina virus	unclassified Phycodnaviridae	Virus	1	1	15
ORF26	gene_26|GeneMark.hmm|187_aa|+|22033|22596	0.003	VOG17623, sp|Q9Q8T2|LAP_RFVKA E3 ubiquitin-protein ligase LAP	Posttranslational modification	Ubiquitination	Phaeocystis globosa virus	unclassified Prymnesiovirus	Virus				2
ORF27	gene_27|GeneMark.hmm|95_aa|-|22682|22969	3e-11	hypothetical protein	Unknown		Chrysochromulina ericina virus	unclassified Phycodnaviridae	Virus
ORF28	gene_28|GeneMark.hmm|179_aa|-|23037|23576	0.027	predicted protein	Unknown				ORFan	1	1	22
ORF29	gene_29|GeneMark.hmm|164_aa|-|23602|24096	2e-33	DnaJ-like protein	Posttranslational modification	chaperone	Phaeocystis globosa virus	unclassified Prymnesiovirus	Virus
ORF30	gene_30|GeneMark.hmm|213_aa|+|24258|24899	0.005	predicted protein	Unknown				ORFan
ORF31	gene_31|GeneMark.hmm|66_aa|-|24896|25096	0.063	predicted protein	Unknown				ORFan
ORF32	gene_32|GeneMark.hmm|162_aa|+|25221|25709	0.001	EamA-like transporter	Resistance	Ion channel	Phaeocystis globosa virus	unclassified Prymnesiovirus	Virus				5
ORF33	gene_33|GeneMark.hmm|336_aa|-|25712|26722	2e-07	hypothetical protein	Unknown		Plasmodium falciparum 3D7	Plasmodium (Laverania)	Eukaryotes	1	1	20
ORF34	gene_34|GeneMark.hmm|650_aa|+|26788|28740	0.002	predicted protein	Unknown		Acanthamoeba castellanii (卡氏棘阿米巴)		ORFan	1	1	24
ORF35	gene_35|GeneMark.hmm|85_aa|-|28750|29007	7.5	predicted protein	Unknown				ORFan
ORF36	gene_36|GeneMark.hmm|299_aa|+|29084|29983	2e-92	Phytanoyl-CoA dioxygenase	Metabolism	Light harvesting; Chlorophyll degradation	Chrysochromulina ericina virus	unclassified Phycodnaviridae	Virus
ORF37	gene_37|GeneMark.hmm|289_aa|+|30033|30902	0 hits	predicted protein	Unknown				ORFan
ORF38	gene_38|GeneMark.hmm|307_aa|+|30972|31895	7e-12	putative prenyltransferase protein	Posttranslational modification	Prenylation	Chrysochromulina ericina virus	unclassified Phycodnaviridae	Virus				8
ORF39	gene_39|GeneMark.hmm|241_aa|+|31946|32671	0.034	predicted protein	Unknown				ORFan	1	1	21	1
ORF40	gene_40|GeneMark.hmm|652_aa|-|32718|34676	0	heat shock 70kDa protein	Posttranslational modification	chaperone	Xenopus tropicalis	western clawed frog	Eukaryotes
ORF41	gene_41|GeneMark.hmm|791_aa|-|34919|37294	0	U-box and intein containing von Willebrand factor type A	Posttranslational modification	Ubiquitination	Chrysochromulina ericina virus	unclassified Phycodnaviridae	Virus
ORF42	gene_42|GeneMark.hmm|224_aa|+|37471|38145	0.038	predicted protein	Unknown				ORFan				2
ORF43	gene_43|GeneMark.hmm|157_aa|-|38170|38643	1.3	predicted protein	Unknown				ORFan				4
ORF44	gene_44|GeneMark.hmm|144_aa|-|38697|39131	0.93	predicted protein	Unknown				ORFan
ORF45	gene_45|GeneMark.hmm|82_aa|+|39246|39494	0.17	predicted protein	Unknown				ORFan
ORF46	gene_46|GeneMark.hmm|243_aa|+|40895|41626	2e-106	hypothetical protein	Unknown		Chrysochromulina ericina virus	unclassified Phycodnaviridae	Virus				2
ORF47	gene_47|GeneMark.hmm|189_aa|-|41669|42238	2e-28	hypothetical protein	Unknown		Phaeocystis globosa virus	unclassified Prymnesiovirus	Virus
ORF48	gene_48|GeneMark.hmm|204_aa|-|42336|42950	7e-26	hypothetical protein	Unknown		Phaeocystis globosa virus	unclassified Prymnesiovirus	Virus
ORF49	gene_49|GeneMark.hmm|656_aa|+|43200|45170	2e-62	2-polyprenylphenol 6-hydroxylase	Metabolism	Respiration chain; CoQ (ubiquinone) biosynthesis in mitochondria	Phaeocystis globosa virus	unclassified Prymnesiovirus	Virus
ORF50	gene_50|GeneMark.hmm|84_aa|-|45298|45552	2.9	DnaJ-like protein	Posttranslational modification	chaperone			ORFan
ORF51	gene_51|GeneMark.hmm|193_aa|+|45704|46285	1e-07	hypothetical protein	Unknown		Lupinus angustifolius	narrow-leaved blue lupine	Eukaryotes
ORF52	gene_52|GeneMark.hmm|456_aa|-|46296|47666	1e-154	DNA methyltrasferase	Resistance	Restriction-modification system	Phaeocystis globosa virus	unclassified Prymnesiovirus	Virus
ORF53	gene_53|GeneMark.hmm|215_aa|-|47775|48422	3.8	predicted protein	Unknown				ORFan
ORF54	gene_54|GeneMark.hmm|209_aa|+|48523|49152	4e-06	hypothetical protein	Unknown		Bombyx mori	domestic silkworm	Eukaryotes
ORF55	gene_55|GeneMark.hmm|164_aa|-|49172|49666	9e-34	putative Nudix hydrolase	Translation		Phaeocystis globosa virus	unclassified Prymnesiovirus	Virus
ORF56	gene_56|GeneMark.hmm|148_aa|-|49764|50210	6e-25	hypothetical protein	Unknown		Phaeocystis globosa virus	unclassified Prymnesiovirus	Virus
ORF57	gene_57|GeneMark.hmm|212_aa|+|50486|51124	3e-12	putative CLP_protease	Posttranslational modification	Protease, S14	Phaeocystis globosa virus	unclassified Prymnesiovirus	Virus
ORF58	gene_58|GeneMark.hmm|440_aa|-|51164|52486	8e-98	hypothetical protein	Unknown		Phaeocystis globosa virus	unclassified Prymnesiovirus	Virus
ORF59	gene_59|GeneMark.hmm|678_aa|+|52776|54812	0	ELP3-like acetyltransferase	Posttranslational modification	Acetylation	Phaeocystis globosa virus	unclassified Prymnesiovirus	Virus
ORF60	gene_60|GeneMark.hmm|244_aa|-|54913|55647	4e-39	DUF1599 domain-containing protein	Metabolism	Nucleotides; putative nucleotide modification	Phaeocystis globosa virus	unclassified Prymnesiovirus	Virus
ORF61	gene_61|GeneMark.hmm|62_aa|-|55794|55982	2.5	predicted protein	Unknown				ORFan
ORF62	gene_62|GeneMark.hmm|132_aa|+|56181|56579	6e-12	hypothetical protein	Unknown		Chrysochromulina ericina virus	unclassified Phycodnaviridae	Virus
ORF63	gene_63|GeneMark.hmm|199_aa|-|56596|57195	2e-25	hypothetical protein	Unknown		Phaeocystis globosa virus	unclassified Prymnesiovirus	Virus
ORF64	gene_64|GeneMark.hmm|313_aa|+|57382|58323	5e-33	hypothetical protein	Unknown		Phaeocystis globosa virus	unclassified Prymnesiovirus	Virus
ORF65	gene_65|GeneMark.hmm|117_aa|-|58320|58673	2e-18	EamA-like transporter	Resistance	Ion channel	Phaeocystis globosa virus	unclassified Prymnesiovirus	Virus				4
ORF66	gene_66|GeneMark.hmm|421_aa|-|58698|59963	1e-10	hypothetical protein	Unknown		Phaeocystis globosa virus	unclassified Prymnesiovirus	Virus				1
ORF67	gene_67|GeneMark.hmm|136_aa|+|60159|60569	0.25	predicted protein	Unknown				ORFan
ORF68	gene_66|GeneMark.hmm|421_aa|-|58698|59963	1e-05	hypothetical protein	Unknown		Papilio machaon	common yellow swallowtail	Eukaryotes
ORF69	gene_67|GeneMark.hmm|136_aa|+|60159|60569	0	NAD-dependent DNA ligase	Replication		Phaeocystis globosa virus	unclassified Prymnesiovirus	Virus
ORF70	gene_70|GeneMark.hmm|524_aa|-|64965|66539	1e-05	hypothetical protein	Unknown		Papilio machaon	common yellow swallowtail	Eukaryotes
ORF71	gene_71|GeneMark.hmm|57_aa|-|66766|66939	9e-07	hypothetical protein	Unknown		Phaeocystis globosa virus	unclassified Prymnesiovirus	Virus
ORF72	gene_72|GeneMark.hmm|547_aa|+|67209|68852	2e-39	hypothetical protein	Unknown		Phaeocystis globosa virus	unclassified Prymnesiovirus	Virus
ORF73	gene_73|GeneMark.hmm|499_aa|-|68857|70356	2e-14	VOG04103; sp|P08393|ICP0_HHV11 E3 ubiquitin-protein ligase ICP0	Posttranslational modification	Ubiquitination	Chrysochromulina ericina virus	unclassified Phycodnaviridae	Virus
ORF74	gene_74|GeneMark.hmm|138_aa|-|70430|70846	3e-06	hypothetical protein	Unknown		Phaeocystis globosa virus	unclassified Prymnesiovirus	Virus
ORF75	gene_75|GeneMark.hmm|273_aa|+|71063|71884	1e-08	hypothetical protein	Unknown		Phaeocystis globosa virus	unclassified Prymnesiovirus	Virus
ORF76	gene_76|GeneMark.hmm|140_aa|-|71835|72257	2e-61	VOG14608; sp|Q5UPY6|YL300_MIMIV Uncharacterized protein L300; GIY-YIG endonuclease superfamily protein	DNA repair and recombination		Chrysochromulina ericina virus	unclassified Phycodnaviridae	Virus
ORF77	gene_77|GeneMark.hmm|93_aa|-|72729|73010	6e-31	putative nucleoside deaminase	Metabolism	Nucleotides	Phaeocystis globosa virus	unclassified Prymnesiovirus	Virus
ORF78	gene_78|GeneMark.hmm|304_aa|+|73176|74090	2e-63	deoxyuridine 5'-triphosphate nucleotidohydrolase	Metabolism	Nucleotides	Phaeocystis globosa virus	unclassified Prymnesiovirus	Virus
ORF79	gene_79|GeneMark.hmm|832_aa|+|74197|76695	4e-60	hypothetical protein	Unknown		Phaeocystis globosa virus	unclassified Prymnesiovirus	Virus				2
ORF80	gene_80|GeneMark.hmm|199_aa|+|76811|77410	7e-05	protein nanos 1	Translation		Folsomia candida	Isotomidae	Eukaryotes
ORF81	gene_81|GeneMark.hmm|135_aa|-|77579|77986	1e-29	hypothetical protein	Unknown		Phaeocystis globosa virus	unclassified Prymnesiovirus	Virus
ORF82	gene_82|GeneMark.hmm|136_aa|-|78196|78606	0.062	predicted protein	Unknown				ORFan
ORF83	gene_83|GeneMark.hmm|102_aa|-|78677|78985	1e-20	hypothetical protein	Unknown		Phaeocystis globosa virus	unclassified Prymnesiovirus	Virus
ORF84	gene_84|GeneMark.hmm|58_aa|+|79277|79453	5.8	predicted protein	Unknown				ORFan
ORF85	gene_85|GeneMark.hmm|283_aa|+|79511|80362	4e-132	hypothetical protein	Unknown		Chrysochromulina ericina virus	unclassified Phycodnaviridae	Virus
ORF86	gene_86|GeneMark.hmm|541_aa|+|80518|82143	6e-20	Glycosyltransferase involved in cell membrane biogenesis	Metabolism	Glycan modification	Trypanosoma cruzi	protozoan	Eukaryotes
ORF87	gene_87|GeneMark.hmm|367_aa|+|82305|83408	9e-131	UDP-glucose/GDP-mannose dehydrogenase	Metabolism	Glycan modification	Trichomonas vaginalis	protozoan	Eukaryotes
ORF88	gene_88|GeneMark.hmm|208_aa|+|83454|84080	2e-24	Methyltransferase FkbM family	Metabolism	Glycan modification	Candidatus Solibacter usitatus	Candidatus Solibacter	Bacteria
ORF89	gene_89|GeneMark.hmm|311_aa|+|84126|85061	5e-91	hypothetical protein	Unknown		Synechococcus virus ST4	Synechococcus virus ST4	Virus
ORF90	gene_90|GeneMark.hmm|303_aa|+|85097|86008	3e-39	hypothetical protein	Unknown		Methanoregula formicica	Methanoregula	Archaea
ORF91	gene_91|GeneMark.hmm|87_aa|-|85989|86252	0.002	Glycosyltransferase, family 61	Metabolism	Glycan modification	Cyanobacterium sp. HL-69		ORFan
ORF92	gene_92|GeneMark.hmm|50_aa|+|86542|86694	2.5	predicted protein	Unknown				ORFan	1	1	27
ORF93	gene_93|GeneMark.hmm|63_aa|-|86834|87025	3.7	predicted protein	Unknown				ORFan
ORF94	gene_94|GeneMark.hmm|255_aa|+|87096|87863	1e-11	hypothetical protein	Unknown		Geobacter daltonii FRC-32	Geotalea	Bacteria
ORF95	gene_95|GeneMark.hmm|262_aa|+|87889|88677	3e-96	SAM-dependent methyltransferase	Posttranslational modification	Methylation	Synechococcus virus Bellamy (聚球藻噬菌体)	Synechococcus virus Bellamy	Virus
ORF96	gene_96|GeneMark.hmm|271_aa|+|88745|89560	5e-18	hypothetical protein	Unknown		Arthrospira platensis	Arthrospira	Bacteria
ORF97	gene_97|GeneMark.hmm|111_aa|+|90285|90620	0.66	predicted protein	Unknown				ORFan
ORF98	gene_98|GeneMark.hmm|135_aa|-|90626|91033	3e-38	disulfide isomerase (thioredoxin domain-containing)	Metabolism	Respiration chain; Cellular redox balance	Chrysochromulina ericina virus	unclassified Phycodnaviridae	Virus	1	1	34			ORF98	ORF98
ORF99	gene_99|GeneMark.hmm|122_aa|+|92665|93033	5e-07	class II HMG-box domain containing protein	Chromatin remodelling		Chrysochromulina ericina virus	unclassified Phycodnaviridae	Virus
ORF100	gene_100|GeneMark.hmm|111_aa|+|93141|93476	0.023	HMG-box-containning protein	Chromatin remodelling				ORFan
ORF101	gene_101|GeneMark.hmm|143_aa|+|95755|96186	0.0003	HMG domain-containing protein 4 isoform X1; high mobility group protein 2-like 1	Chromatin remodelling		Nematostella vectensis	starlet sea anemone	Eukaryotes
ORF102	gene_102|GeneMark.hmm|134_aa|+|96427|96831	3e-05	HMG-box-containning protein	Chromatin remodelling		Micromonas commoda	Micromonas	Eukaryotes
ORF103	gene_103|GeneMark.hmm|100_aa|+|96941|97243	1.9	predicted protein	Unknown				ORFan
ORF104	gene_104|GeneMark.hmm|254_aa|+|97381|98145	0.0003	zinc finger containing protein	Posttranslational modification	Ubiquitination	Gigantopelta aegis	peltospirid snail	Eukaryotes
ORF105	gene_105|GeneMark.hmm|126_aa|-|98123|98503	3e-39	cold-shock domain family protein	Posttranslational modification	chaperone	Phaeocystis globosa virus	unclassified Prymnesiovirus	Virus
ORF106	gene_106|GeneMark.hmm|241_aa|+|98622|99347	1e-20	hypothetical protein	Unknown		Phaeocystis globosa virus	unclassified Prymnesiovirus	Virus
ORF107	gene_107|GeneMark.hmm|266_aa|-|99361|100161	2e-71	CK1 family protein kinase	Posttranslational modification	Phosphorylation	Phaeocystis globosa virus	unclassified Prymnesiovirus	Virus
ORF108	gene_108|GeneMark.hmm|251_aa|-|100202|100957	5e-09	Peptidase E; dipeptidase E	Posttranslational modification		Bifidobacterium breve JCM 7019	Bifidobacterium	Bacteria
ORF109	gene_109|GeneMark.hmm|293_aa|-|101046|101927	2e-83	Cupin-like domain-containing protein	Chromatin remodelling		Phaeocystis globosa virus	unclassified Prymnesiovirus	Virus
ORF110	gene_110|GeneMark.hmm|540_aa|-|101976|103598	0.004	predicted protein	Unknown		Solanum tuberosum (potato)		ORFan
ORF111	gene_111|GeneMark.hmm|305_aa|-|103640|104557	7e-148	thymidylate synthase	Metabolism	Nucleotides	Phaeocystis globosa virus	unclassified Prymnesiovirus	Virus
ORF112	gene_112|GeneMark.hmm|255_aa|+|104892|105659	4e-98	hypothetical protein	Unknown		Phaeocystis globosa virus	unclassified Prymnesiovirus	Virus				2
ORF113	gene_113|GeneMark.hmm|371_aa|-|105787|106902	0.087	predicted protein	Unknown				ORFan				6
ORF114	gene_114|GeneMark.hmm|337_aa|-|106947|107960	5e-87	hypothetical protein	Unknown		Phaeocystis globosa virus	unclassified Prymnesiovirus	Virus
ORF115	gene_115|GeneMark.hmm|44_aa|+|108113|108247	8	predicted protein	Unknown				ORFan
ORF116	gene_116|GeneMark.hmm|99_aa|+|108760|109059	2e-21	hypothetical protein	Unknown		Phaeocystis globosa virus	unclassified Prymnesiovirus	Virus				3
ORF117	gene_117|GeneMark.hmm|266_aa|-|109044|109844	2e-59	hypothetical protein	Unknown		Phaeocystis globosa virus	unclassified Prymnesiovirus	Virus
ORF118	gene_118|GeneMark.hmm|141_aa|+|109997|110422	6e-17	hypothetical protein	Unknown		Phaeocystis globosa virus	unclassified Prymnesiovirus	Virus
ORF119	gene_119|GeneMark.hmm|138_aa|-|110425|110841	9e-39	hypothetical protein	Unknown		Phaeocystis globosa virus	unclassified Prymnesiovirus	Virus
ORF120	gene_120|GeneMark.hmm|75_aa|+|110814|111041	1.7	predicted protein	Unknown				ORFan				2
ORF121	gene_121|GeneMark.hmm|245_aa|-|111276|112013	0.66	predicted protein	Unknown				ORFan
ORF122	gene_122|GeneMark.hmm|228_aa|-|112069|112755	0 hits	predicted protein	Unknown				ORFan
ORF123	gene_123|GeneMark.hmm|201_aa|-|112782|113387	5e-33	hypothetical protein	Unknown		Phaeocystis globosa virus	unclassified Prymnesiovirus	Virus
ORF124	gene_124|GeneMark.hmm|571_aa|+|113533|115248	0	asparagine synthetase B	Metabolism	Amino acids	Phaeocystis globosa virus	unclassified Prymnesiovirus	Virus
ORF125	gene_125|GeneMark.hmm|158_aa|-|115280|115756	2.7	predicted protein	Unknown				ORFan
ORF126	gene_126|GeneMark.hmm|289_aa|+|116010|116879	2e-95	SUMO-1-specific cysteine protease	Posttranslational modification	Protease, C48	Phaeocystis globosa virus	unclassified Prymnesiovirus	Virus						ORF126	ORF126
ORF127	gene_127|GeneMark.hmm|349_aa|-|116904|117953	2e-22	hypothetical protein	Unknown		Phaeocystis globosa virus	unclassified Prymnesiovirus	Virus
ORF128	gene_128|GeneMark.hmm|333_aa|+|118208|119209	6e-08	Putative glycosyltransferase	Metabolism	Glycan modification	Pararhodospirillum photometricum	Pararhodospirillum	Bacteria
ORF129	gene_129|GeneMark.hmm|1251_aa|-|119254|123009	0	VOG00451; sp|P04308|ETF1_VACCW Early transcription factor 70 kDa subunit	Transcription		Phaeocystis globosa virus	unclassified Prymnesiovirus	Virus					ORF129	ORF129	ORF129
ORF130	gene_130|GeneMark.hmm|363_aa|-|123302|124393	3e-175	ribonuclease III	Translation		Phaeocystis globosa virus	unclassified Prymnesiovirus	Virus
ORF131	gene_131|GeneMark.hmm|107_aa|+|124537|124860	4e-13	hypothetical protein	Unknown		Phaeocystis globosa virus	unclassified Prymnesiovirus	Virus
ORF132	gene_132|GeneMark.hmm|286_aa|+|124973|125833	3e-64	ERCC4-type DNA repair nuclease	DNA repair and recombination		Phaeocystis globosa virus	unclassified Prymnesiovirus	Virus
ORF133	gene_133|GeneMark.hmm|168_aa|+|125900|126406	8e-31	hypothetical protein	Unknown		Phaeocystis globosa virus	unclassified Prymnesiovirus	Virus
ORF134	gene_134|GeneMark.hmm|163_aa|+|126576|127067	5	predicted protein	Unknown				ORFan	1	1	25	1
ORF135	gene_135|GeneMark.hmm|127_aa|-|127084|127467	7e-10	hypothetical protein	Unknown		Phaeocystis globosa virus	unclassified Prymnesiovirus	Virus
ORF136	gene_136|GeneMark.hmm|269_aa|-|127734|128543	3e-70	hypothetical protein	Unknown		Phaeocystis globosa virus	unclassified Prymnesiovirus	Virus				1
ORF137	gene_137|GeneMark.hmm|113_aa|-|128743|129084	0.54	predicted protein	Unknown				ORFan				4
ORF138	gene_138|GeneMark.hmm|143_aa|+|129200|129631	3e-26	disulfide isomerase (thioredoxin domain-containing)	Metabolism	Respiration chain; Cellular redox balance	Phaeocystis globosa virus	unclassified Prymnesiovirus	Virus
ORF139	gene_139|GeneMark.hmm|300_aa|-|129628|130530	7e-33	hypothetical protein	Unknown		Phaeocystis globosa virus	unclassified Prymnesiovirus	Virus				1
ORF140	gene_140|GeneMark.hmm|430_aa|+|130629|131921	1e-69	hypothetical protein	Unknown		Phaeocystis globosa virus	unclassified Prymnesiovirus	Virus
ORF141	gene_141|GeneMark.hmm|69_aa|+|132051|132260	9e-11	hypothetical protein	Unknown		Phaeocystis globosa virus	unclassified Prymnesiovirus	Virus
ORF142	gene_142|GeneMark.hmm|344_aa|-|132336|133370	1e-126	hypothetical protein	Unknown		Phaeocystis globosa virus	unclassified Prymnesiovirus	Virus
ORF143	gene_143|GeneMark.hmm|382_aa|+|133449|134597	1e-75	methyltransferase	Metabolism	Respiration chain; Plastoquinol biosynthesis	Phaeocystis globosa virus	unclassified Prymnesiovirus	Virus
ORF144	gene_144|GeneMark.hmm|36_aa|+|134575|134685	0 hits	predicted protein	Unknown				ORFan
ORF145	gene_145|GeneMark.hmm|263_aa|-|134678|135469	1e-32	hypothetical protein	Unknown		Phaeocystis globosa virus	unclassified Prymnesiovirus	Virus				1
ORF146	gene_146|GeneMark.hmm|229_aa|+|135548|136237	2e-58	EF-hand-containing protein	Posttranslational modification	Phosphorylation	Phaeocystis globosa virus	unclassified Prymnesiovirus	Virus				3
ORF147	gene_147|GeneMark.hmm|1076_aa|+|136287|139517	1e-18	hypothetical protein	Unknown		Cavenderia fasciculata	cellular slime mold	Eukaryotes
ORF148	gene_148|GeneMark.hmm|225_aa|-|139514|140191	2e-71	Bacteriorhodopsin-like protein	Metabolism	Light harvesting	Phaeocystis globosa virus	unclassified Prymnesiovirus	Virus				7
ORF149	gene_149|GeneMark.hmm|275_aa|-|140331|141158	1e-79	RNase H PIN (5'-3' exonuclease) domain	Replication		Phaeocystis globosa virus	unclassified Prymnesiovirus	Virus
ORF150	gene_150|GeneMark.hmm|121_aa|-|141297|141662	0.11	GlpM membrane protein	Metabolism	Glycan modification			ORFan				4
ORF151	gene_151|GeneMark.hmm|442_aa|-|141743|143071	6e-163	Amino-oxidase family protein	Metabolism	Amino acids	Phaeocystis globosa virus	unclassified Prymnesiovirus	Virus
ORF152	gene_152|GeneMark.hmm|129_aa|-|143124|143513	3.7	predicted protein	Unknown				ORFan				4
ORF153	gene_153|GeneMark.hmm|283_aa|-|143565|144416	3e-108	rhodanese-like domain protein	Unknown		Phaeocystis globosa virus	unclassified Prymnesiovirus	Virus
ORF154	gene_154|GeneMark.hmm|124_aa|-|144468|144842	2e-41	hypothetical protein	Unknown		Phaeocystis globosa virus	unclassified Prymnesiovirus	Virus
ORF155	gene_155|GeneMark.hmm|525_aa|-|144978|146555	0	hypothetical protein	Unknown		Phaeocystis globosa virus	unclassified Prymnesiovirus	Virus					ORF155		ORF155
ORF156	gene_156|GeneMark.hmm|279_aa|-|146626|147465	1e-89	Putative Holliday junction resolvase	DNA repair and recombination		Phaeocystis globosa virus	unclassified Prymnesiovirus	Virus					ORF156	ORF156	ORF156
ORF157	gene_157|GeneMark.hmm|80_aa|-|147576|147818	5e-18	hypothetical protein	Unknown		Phaeocystis globosa virus	unclassified Prymnesiovirus	Virus				2
ORF158	gene_158|GeneMark.hmm|136_aa|-|147950|148360	7e-52	hypothetical protein	Unknown		Phaeocystis globosa virus	unclassified Prymnesiovirus	Virus
ORF159	gene_159|GeneMark.hmm|260_aa|-|148514|149296	4e-23	hypothetical protein	Unknown		Phaeocystis globosa virus	unclassified Prymnesiovirus	Virus				1
ORF160	gene_160|GeneMark.hmm|656_aa|-|149329|151299	0	MutS 8-like protein	DNA repair and recombination		Phaeocystis globosa virus	unclassified Prymnesiovirus	Virus				2		ORF160	ORF160
ORF161	gene_161|GeneMark.hmm|485_aa|+|151410|152867	5e-48	hypothetical protein	Unknown		Phaeocystis globosa virus	unclassified Prymnesiovirus	Virus
ORF162	gene_162|GeneMark.hmm|102_aa|-|152892|153200	3.4	predicted protein	Unknown				ORFan
ORF163	gene_163|GeneMark.hmm|724_aa|+|153263|155437	2e-65	hypothetical protein	Unknown		Phaeocystis globosa virus	unclassified Prymnesiovirus	Virus
ORF164	gene_164|GeneMark.hmm|691_aa|+|155481|157556	7e-22	hypothetical protein	Unknown		Emiliania huxleyi	algae	Eukaryotes
ORF165	gene_165|GeneMark.hmm|652_aa|-|157546|159504	2e-100	AF-4 damian-containing protein	Unknown		Chrysochromulina ericina virus	unclassified Phycodnaviridae	Virus
ORF166	gene_166|GeneMark.hmm|278_aa|+|159741|160577	1e-180	VV A32-like packaging ATPase	Virus morphogenesis		Phaeocystis globosa virus	unclassified Prymnesiovirus	Virus					ORF166		ORF166
ORF167	gene_167|GeneMark.hmm|130_aa|-|160599|160991	0.21	predicted protein	Unknown				ORFan				4
ORF168	gene_168|GeneMark.hmm|84_aa|-|161033|161287	5.8	predicted protein	Unknown				ORFan
ORF169	gene_169|GeneMark.hmm|366_aa|-|161378|162478	7e-152	hypothetical protein	Unknown		Phaeocystis globosa virus	unclassified Prymnesiovirus	Virus						ORF169	ORF169
ORF170	gene_170|GeneMark.hmm|83_aa|+|162687|162938	4e-36	hypothetical protein	Unknown		Phaeocystis globosa virus	unclassified Prymnesiovirus	Virus				2
ORF171	gene_171|GeneMark.hmm|144_aa|+|163120|163554	7e-27	N-acetylglucosamine-1-phosphate uridyltransferase	Metabolism	Glycan modification; UDP-GlcNAc biosynthesis	Cafeteria roenbergensis virus	Cafeteria roenbergensis virus	Virus
ORF172	gene_172|GeneMark.hmm|218_aa|+|163657|164313	8e-78	hypothetical protein	Unknown		Phaeocystis globosa virus	unclassified Prymnesiovirus	Virus					ORF172		ORF172
ORF173	gene_173|GeneMark.hmm|271_aa|+|164364|165179	3e-85	glycosyltransferase, family 7 (beta-1,4-galactosyltransferase)	Metabolism	Glycan modification	Phaeocystis globosa virus	unclassified Prymnesiovirus	Virus
ORF174	gene_174|GeneMark.hmm|718_aa|-|165200|167356	0	Glutamine-fructose-6-phosphate transaminase	Metabolism	Glycan modification; UDP-GlcNAc biosynthesis	Phaeocystis globosa virus	unclassified Prymnesiovirus	Virus
ORF175	gene_175|GeneMark.hmm|325_aa|-|167482|168459	0	ribonucleoside-diphosphate reductase small subunit	Metabolism	Nucleotides	Phaeocystis globosa virus	unclassified Prymnesiovirus	Virus					ORF175	ORF175	ORF175
ORF176	gene_176|GeneMark.hmm|127_aa|+|168609|168992	2e-11	hypothetical protein	Unknown		Phaeocystis globosa virus	unclassified Prymnesiovirus	Virus				3
ORF177	gene_177|GeneMark.hmm|125_aa|+|169316|169693	0.18	predicted protein	Unknown				ORFan
ORF178	gene_178|GeneMark.hmm|275_aa|+|169817|170644	3e-50	hypothetical protein	Unknown		Phaeocystis globosa virus	unclassified Prymnesiovirus	Virus				4
ORF179	gene_179|GeneMark.hmm|130_aa|+|170716|171108	0.0007	hypothetical protein	Unknown		Phaeocystis globosa virus	unclassified Prymnesiovirus	Virus				2
ORF180	gene_180|GeneMark.hmm|221_aa|+|171163|171828	9e-72	hypothetical protein	Unknown		Phaeocystis globosa virus	unclassified Prymnesiovirus	Virus				1
ORF181	gene_181|GeneMark.hmm|136_aa|+|171954|172364	2e-37	Quaternary amonium transporter	Metabolism	Amino acids	Chrysochromulina ericina virus	unclassified Phycodnaviridae	Virus				4
ORF182	gene_182|GeneMark.hmm|597_aa|-|172427|174220	0	hypothetical protein	Unknown		Phaeocystis globosa virus	unclassified Prymnesiovirus	Virus
ORF183	gene_183|GeneMark.hmm|165_aa|-|174421|174918	5e-52	hypothetical protein	Unknown		Phaeocystis globosa virus	unclassified Prymnesiovirus	Virus
ORF184	gene_184|GeneMark.hmm|510_aa|-|175128|176660	2e-19	Outer membrane autotransporter	Recognition		Phaeocystis globosa virus	unclassified Prymnesiovirus	Virus
ORF185	gene_185|GeneMark.hmm|101_aa|+|176869|177174	8e-35	DVNP domain-containing protein	Chromatin remodelling		Phaeocystis globosa virus	unclassified Prymnesiovirus	Virus
ORF186	gene_186|GeneMark.hmm|174_aa|+|177294|177818	0.0004	hypothetical protein	Unknown		Chrysochromulina ericina virus	unclassified Phycodnaviridae	Virus
ORF187	gene_187|GeneMark.hmm|277_aa|+|177984|178817	6e-87	Exodeoxyribonuclease III	DNA repair and recombination		Phaeocystis globosa virus	unclassified Prymnesiovirus	Virus
ORF188	gene_188|GeneMark.hmm|291_aa|+|179031|179906	3e-159	putative proliferating cell nuclear antigen	Replication		Phaeocystis globosa virus	unclassified Prymnesiovirus	Virus					ORF188	ORF188	ORF188
ORF189	gene_189|GeneMark.hmm|268_aa|-|179945|180751	8e-46	Eukaryotic initiation factor 4E family protein	Translation		Phaeocystis globosa virus	unclassified Prymnesiovirus	Virus
ORF190	gene_190|GeneMark.hmm|1546_aa|-|180852|185492	0	Bacterial surface protein 26-residue repeat	Unknown		Ostreococcus tauri	Ostreococcus	Eukaryotes
ORF191	gene_191|GeneMark.hmm|335_aa|-|185596|186603	4e-41	hypothetical protein	Unknown		Phaeocystis globosa virus	unclassified Prymnesiovirus	Virus				3
ORF192	gene_192|GeneMark.hmm|464_aa|-|186709|188103	2e-172	Glycotransferase, family 2	Metabolism	Glycan modification	Phaeocystis globosa virus	unclassified Prymnesiovirus	Virus
ORF193	gene_193|GeneMark.hmm|570_aa|-|188242|189954	1e-16	hypothetical protein	Unknown		Phaeocystis globosa virus	unclassified Prymnesiovirus	Virus				10
ORF194	gene_194|GeneMark.hmm|706_aa|+|190029|192149	1e-69	GMP reductase	Metabolism	Nucleotides	Phaeocystis globosa virus	unclassified Prymnesiovirus	Virus
ORF195	gene_195|GeneMark.hmm|506_aa|+|192244|193764	1e-19	hypothetical protein	Unknown		Phaeocystis globosa virus	unclassified Prymnesiovirus	Virus				1
ORF196	gene_196|GeneMark.hmm|157_aa|-|194023|194496	0 hits	predicted protein	Unknown				ORFan
ORF197	gene_197|GeneMark.hmm|101_aa|-|194490|194795	2e-50	hypothetical protein	Unknown		Phaeocystis globosa virus	unclassified Prymnesiovirus	Virus
ORF198	gene_198|GeneMark.hmm|165_aa|+|194847|195344	6e-43	hypothetical protein	Unknown		Phaeocystis globosa virus	unclassified Prymnesiovirus	Virus
ORF199	gene_199|GeneMark.hmm|606_aa|-|195341|197161	0	Major capsid protein MCP2	Virus morphogenesis		Phaeocystis globosa virus	unclassified Prymnesiovirus	Virus					ORF199	ORF199	ORF199
ORF200	gene_200|GeneMark.hmm|96_aa|+|197104|197394	2e-10	hypothetical protein	Unknown		Culex quinquefasciatus	southern house mosquito	Eukaryotes
ORF201	gene_201|GeneMark.hmm|394_aa|+|197419|198603	1e-52	Phosphatidylinositol-specific phospholipase C, Y domain	Resistance		Phaeocystis globosa virus	unclassified Prymnesiovirus	Virus
ORF202	gene_202|GeneMark.hmm|463_aa|+|198700|200091	0	polyA polymerase catalytic subunit	Transcription		Phaeocystis globosa virus	unclassified Prymnesiovirus	Virus
ORF203	gene_203|GeneMark.hmm|292_aa|-|200105|200983	4e-107	Serine/threonine Mitogen-activated Protein kinase	Posttranslational modification	Phosphorylation	Chrysochromulina ericina virus	unclassified Phycodnaviridae	Virus
ORF204	gene_204|GeneMark.hmm|1070_aa|-|201253|204465	0 hits	predicted protein	Unknown				ORFan
ORF205	gene_205|GeneMark.hmm|126_aa|+|204596|204976	1	predicted protein	Unknown				ORFan
ORF206	gene_206|GeneMark.hmm|209_aa|-|205011|205640	3e-54	hypothetical protein	Unknown		Phaeocystis globosa virus	unclassified Prymnesiovirus	Virus
ORF207	gene_207|GeneMark.hmm|190_aa|+|205694|206266	4e-47	hypothetical protein	Unknown		Phaeocystis globosa virus	unclassified Prymnesiovirus	Virus
ORF208	gene_208|GeneMark.hmm|439_aa|+|206444|207763	3e-175	lambda-type exonuclease	DNA repair and recombination		Phaeocystis globosa virus	unclassified Prymnesiovirus	Virus					ORF208	ORF208	ORF208
ORF209	gene_209|GeneMark.hmm|211_aa|-|207768|208403	1e-40	Toll-like receptor	Resistance	Inhibition of apoptosis	Chrysochromulina ericina virus	unclassified Phycodnaviridae	Virus
ORF210	gene_210|GeneMark.hmm|1178_aa|+|208519|212055	0	putative ribonucleoside di phosphate reductase alpha subunit	Metabolism	Nucleotides	Aureococcus anophagefferens virus	unclassified Phycodnaviridae	Virus					ORF210	ORF210	ORF210
ORF211	gene_211|GeneMark.hmm|648_aa|+|212147|214093	2e-157	FtsJ-like methyltransferase	Translation		Phaeocystis globosa virus	unclassified Prymnesiovirus	Virus
ORF212	gene_212|GeneMark.hmm|270_aa|-|214252|215064	2e-12	hypothetical protein	Unknown		Phaeocystis globosa virus	unclassified Prymnesiovirus	Virus
ORF213	gene_213|GeneMark.hmm|101_aa|+|215312|215617	0.48	predicted protein	Unknown				ORFan				1
ORF214	gene_214|GeneMark.hmm|380_aa|+|215743|216885	1e-26	hypothetical protein	Unknown		Phaeocystis globosa virus	unclassified Prymnesiovirus	Virus				1
ORF215	gene_215|GeneMark.hmm|262_aa|+|216925|217713	2e-18	hypothetical protein	Unknown		Phaeocystis globosa virus	unclassified Prymnesiovirus	Virus				1
ORF216	gene_216|GeneMark.hmm|420_aa|-|217862|219124	3e-83	hypothetical protein	Unknown		Phaeocystis globosa virus	unclassified Prymnesiovirus	Virus
ORF217	gene_217|GeneMark.hmm|1662_aa|+|219409|224397	0	DNA-directed RNA polymerase II subunit RPB2	Transcription		Phaeocystis globosa virus	unclassified Prymnesiovirus	Virus					ORF217	ORF217	ORF217
ORF218	gene_218|GeneMark.hmm|288_aa|+|224471|225337	2e-08	hypothetical protein	Unknown		Chrysochromulina ericina virus	unclassified Phycodnaviridae	Virus
ORF219	gene_219|GeneMark.hmm|146_aa|+|225465|225905	1e-05	hypothetical protein	Unknown		Chrysochromulina ericina virus	unclassified Phycodnaviridae	Virus
ORF220	gene_220|GeneMark.hmm|140_aa|+|225983|226405	5e-13	hypothetical protein	Unknown		Phaeocystis globosa virus	unclassified Prymnesiovirus	Virus
ORF221	gene_221|GeneMark.hmm|1111_aa|+|226568|229903	0	MutS7 protein; DNA mismatch repair protein MutS	DNA repair and recombination		Phaeocystis globosa virus	unclassified Prymnesiovirus	Virus
ORF222	gene_222|GeneMark.hmm|107_aa|-|229898|230221	7e-19	VOG00492; sp|P03034|RPC1_LAMBD Repressor protein cI	Transcription		Chrysochromulina ericina virus	unclassified Phycodnaviridae	Virus
ORF223	gene_223|GeneMark.hmm|237_aa|-|230316|231029	1e-32	glycosyl transferase, family 25	Resistance	Lysis, endlysin	Herbaspirillum sp. Meg3	unclassified Herbaspirillum	Eukaryotes
ORF224	gene_224|GeneMark.hmm|393_aa|-|231065|232246	5e-72	hypothetical protein	Unknown		Phaeocystis globosa virus	unclassified Prymnesiovirus	Virus
ORF225	gene_225|GeneMark.hmm|353_aa|-|232858|233919	5e-48	VOG02173; REFSEQ MutT/NUDIX hydrolase family protein	Translation		Zerene cesonia	dogface butterfly	Eukaryotes
ORF226	gene_226|GeneMark.hmm|153_aa|+|234057|234518	0 hits	predicted protein	Unknown				ORFan				1
ORF227	gene_227|GeneMark.hmm|71_aa|+|234617|234832	0.18	predicted protein	Unknown				ORFan	1	1	14	1
ORF228	gene_228|GeneMark.hmm|77_aa|+|234935|235168	8e-34	DNA-directed RNA polymerase, subunit N/RPB10; DNA-directed RNA polymerases I, II, and III subunit RPABC5	Transcription		Chrysochromulina ericina virus	unclassified Phycodnaviridae	Virus
ORF229	gene_229|GeneMark.hmm|94_aa|+|235344|235628	8	predicted protein	Unknown				ORFan
ORF230	gene_230|GeneMark.hmm|113_aa|+|235830|236171	1e-47	hypothetical protein	Unknown		Phaeocystis globosa virus	unclassified Prymnesiovirus	Virus				3
ORF231	gene_231|GeneMark.hmm|1533_aa|+|236318|240919	0	DNA-directed RNA polymerase II subunit RPB2; DNA-directed RNA polymerase II subunit RPB2	Transcription		Phaeocystis globosa virus	unclassified Prymnesiovirus	Virus					ORF231	ORF231	ORF231
ORF232	gene_232|GeneMark.hmm|1338_aa|-|241064|245080	3e-05	pentapeptide repeat-containing protein	Chromatin remodelling		Callorhinchus milii	elephant shark	Eukaryotes
ORF233	gene_233|GeneMark.hmm|137_aa|+|245280|245693	1e-17	hypothetical protein	Unknown		Phaeocystis globosa virus	unclassified Prymnesiovirus	Virus
ORF234	gene_234|GeneMark.hmm|340_aa|+|245889|246911	0.67	predicted protein	Unknown				ORFan
ORF235	gene_235|GeneMark.hmm|1087_aa|+|247086|250349	0	VOG00451; sp|P04308|ETF1_VACCW Early transcription factor 70 kDa subunit	Transcription		Phaeocystis globosa virus	unclassified Prymnesiovirus	Virus					ORF235		ORF235
ORF236	gene_236|GeneMark.hmm|138_aa|-|250370|250786	6e-16	putative ribonuclease H	Replication		Leptospirillum ferrooxidans	Leptospirillum	Bacteria
ORF237	gene_237|GeneMark.hmm|350_aa|-|250851|251903	3e-09	hypothetical protein	Unknown		Nicrophorus vespilloides	burying beetle	Eukaryotes
ORF238	gene_238|GeneMark.hmm|66_aa|-|251890|252090	0 hits	predicted protein	Unknown				ORFan
ORF239	gene_239|GeneMark.hmm|242_aa|+|252056|252784	5e-74	deoxynucleoside kinase	Metabolism	Nucleotides	Phaeocystis globosa virus	unclassified Prymnesiovirus	Virus
ORF240	gene_240|GeneMark.hmm|77_aa|-|252949|253182	8e-46	ubiquitin-small subunit ribosomal protein S27Ae	Posttranslational modification	Ubiquitination	Emiliania huxleyi	algae	Eukaryotes
ORF241	gene_241|GeneMark.hmm|223_aa|-|253276|253947	2e-72	von Willebrand factor type A domain-containing protein	Unknown		Phaeocystis globosa virus	unclassified Prymnesiovirus	Virus
ORF242	gene_242|GeneMark.hmm|53_aa|-|254043|254204	2.1	predicted protein	Unknown				ORFan
ORF243	gene_243|GeneMark.hmm|166_aa|-|254251|254751	1e-14	putative ion channel domain-containing protein	Unknown		Aureococcus anophagefferens virus	unclassified Phycodnaviridae	Virus				2
ORF244	gene_244|GeneMark.hmm|234_aa|-|254806|255510	3e-11	Bacteriorhodopsin-like protein	Metabolism		Phaeocystis globosa virus	unclassified Prymnesiovirus	Virus				7
ORF245	gene_245|GeneMark.hmm|414_aa|+|255603|256847	1e-41	Patatin-like protein	Vesicle trafficking		Emiliania huxleyi	algae	Eukaryotes
ORF246	gene_246|GeneMark.hmm|521_aa|-|256990|258555	0	Major capsid protein MCP	Virus morphogenesis		Phaeocystis globosa virus	unclassified Prymnesiovirus	Virus					ORF246	ORF246	ORF246
ORF247	gene_247|GeneMark.hmm|548_aa|+|258764|260410	1e-134	late transcription factor VLTF3	Transcription		Phaeocystis globosa virus	unclassified Prymnesiovirus	Virus					ORF247	ORF247	ORF247
ORF248	gene_248|GeneMark.hmm|64_aa|-|260407|260601	3e-26	hypothetical protein	Unknown		Phaeocystis globosa virus	unclassified Prymnesiovirus	Virus				2
ORF249	gene_249|GeneMark.hmm|136_aa|+|260840|261250	2e-65	dCMP deaminase	Metabolism	Nucleotides	Phaeocystis globosa virus	unclassified Prymnesiovirus	Virus
ORF250	gene_250|GeneMark.hmm|229_aa|-|261262|261951	2e-41	hypothetical protein	Unknown		Phaeocystis globosa virus	unclassified Prymnesiovirus	Virus				2
ORF251	gene_251|GeneMark.hmm|89_aa|-|261996|262265	4e-33	hypothetical protein	Unknown		Phaeocystis globosa virus	unclassified Prymnesiovirus	Virus
ORF252	gene_252|GeneMark.hmm|78_aa|-|262360|262596	5e-22	hypothetical protein	Unknown		Phaeocystis globosa virus	unclassified Prymnesiovirus	Virus	1	1	27
ORF253	gene_253|GeneMark.hmm|265_aa|-|262725|263522	1e-64	hypothetical protein	Unknown		Phaeocystis globosa virus	unclassified Prymnesiovirus	Virus
ORF254	gene_254|GeneMark.hmm|141_aa|-|263628|264053	1e-40	hypothetical protein	Unknown		Phaeocystis globosa virus	unclassified Prymnesiovirus	Virus				1
ORF255	gene_255|GeneMark.hmm|374_aa|+|264168|265292	1e-45	hypothetical protein	Unknown		Phaeocystis globosa virus	unclassified Prymnesiovirus	Virus				4
ORF256	gene_256|GeneMark.hmm|81_aa|-|265311|265556	3e-21	hypothetical protein	Unknown		Phaeocystis globosa virus	unclassified Prymnesiovirus	Virus				2
ORF257	gene_257|GeneMark.hmm|187_aa|-|265715|266278	8e-41	Putative chlorophyll A-B binding protein	Metabolism	Light harvesting	Chrysochromulina ericina virus	unclassified Phycodnaviridae	Virus	1	1	20	1
ORF258	gene_258|GeneMark.hmm|2031_aa|-|266501|272596	0	hypothetical protein	Unknown		Phaeocystis globosa virus	unclassified Prymnesiovirus	Virus
ORF259	gene_259|GeneMark.hmm|480_aa|+|272739|274181	5e-153	hypothetical protein	Unknown		Phaeocystis globosa virus	unclassified Prymnesiovirus	Virus
ORF260	gene_260|GeneMark.hmm|372_aa|-|274202|275320	1e-147	DNA-directed RNA polymerase II subunit D	Transcription		Phaeocystis globosa virus	unclassified Prymnesiovirus	Virus						ORF260	ORF260
ORF261	gene_261|GeneMark.hmm|181_aa|-|275433|275978	4e-76	hypothetical protein	Unknown		Phaeocystis globosa virus	unclassified Prymnesiovirus	Virus
ORF262	gene_262|GeneMark.hmm|601_aa|+|276334|278139	6e-64	hypothetical protein	Unknown		Phaeocystis globosa virus	unclassified Prymnesiovirus	Virus
ORF263	gene_263|GeneMark.hmm|230_aa|+|278261|278953	1e-65	hypothetical protein	Unknown		Phaeocystis globosa virus	unclassified Prymnesiovirus	Virus				2	ORF263	ORF263	ORF263
ORF264	gene_264|GeneMark.hmm|191_aa|+|279059|279634	2e-76	hypothetical protein	Unknown		Phaeocystis globosa virus	unclassified Prymnesiovirus	Virus
ORF265	gene_265|GeneMark.hmm|118_aa|+|279736|280092	6e-33	hypothetical protein	Unknown		Phaeocystis globosa virus	unclassified Prymnesiovirus	Virus
ORF266	gene_266|GeneMark.hmm|105_aa|-|280153|280470	0 hits	predicted protein	Unknown				ORFan
ORF267	gene_267|GeneMark.hmm|92_aa|+|280632|280910	0.081	predicted protein	Unknown				ORFan				1
ORF268	gene_268|GeneMark.hmm|156_aa|-|280916|281386	1e-34	hypothetical protein	Unknown		Phaeocystis globosa virus	unclassified Prymnesiovirus	Virus				3
ORF269	gene_269|GeneMark.hmm|874_aa|+|281792|284416	3e-179	VV A18-like intein-containing helicase; VOG00039; sp|P20703|UVSW_BPT4 ATP-dependent DNA helicase uvsW	Transcription		Phaeocystis globosa virus	unclassified Prymnesiovirus	Virus					ORF269	ORF269	ORF269
ORF270	gene_270|GeneMark.hmm|118_aa|-|284500|284856	0 hits	predicted protein	Unknown				ORFan
ORF271	gene_271|GeneMark.hmm|260_aa|-|284976|285758	0.095	predicted protein	Unknown				ORFan
ORF272	gene_272|GeneMark.hmm|125_aa|-|285875|286252	1.6	predicted protein	Unknown				ORFan
ORF273	gene_273|GeneMark.hmm|53_aa|-|286347|286508	0 hits	predicted protein	Unknown				ORFan
ORF274	gene_274|GeneMark.hmm|357_aa|-|286530|287603	3e-73	hypothetical protein	Unknown		Phaeocystis globosa virus	unclassified Prymnesiovirus	Virus
ORF275	gene_275|GeneMark.hmm|130_aa|-|287697|288089	1e-11	hypothetical protein	Unknown		Phaeocystis globosa virus	unclassified Prymnesiovirus	Virus
ORF276	gene_276|GeneMark.hmm|161_aa|+|288170|288655	6e-25	hypothetical protein	Unknown		Phaeocystis globosa virus	unclassified Prymnesiovirus	Virus
ORF277	gene_277|GeneMark.hmm|181_aa|+|288743|289288	7e-71	Transcription elongation factor TFIIS_C	Transcription		Phaeocystis globosa virus	unclassified Prymnesiovirus	Virus						ORF277	ORF277
ORF278	gene_278|GeneMark.hmm|268_aa|-|289289|290095	1e-45	DNA-directed RNA polymerase II subunit RPB6	Transcription		Phaeocystis globosa virus	unclassified Prymnesiovirus	Virus					ORF278	ORF278	ORF278
ORF279	gene_279|GeneMark.hmm|129_aa|-|290336|290725	4e-47	DNA-directed RNA polymerase subunit M like protein	Transcription		Phaeocystis globosa virus	unclassified Prymnesiovirus	Virus						ORF279	ORF279
ORF280	gene_280|GeneMark.hmm|302_aa|-|290888|291796	1e-60	ubiquitin-conjugating enzyme E2	Posttranslational modification	Ubiquitination	Phaeocystis globosa virus	unclassified Prymnesiovirus	Virus
ORF281	gene_281|GeneMark.hmm|955_aa|+|291898|294765	0	D5 family helicase	Replication		Phaeocystis globosa virus	unclassified Prymnesiovirus	Virus					ORF281	ORF281	ORF281
ORF282	gene_282|GeneMark.hmm|297_aa|-|294863|295756	1e-26	hypothetical protein	Unknown		Phaeocystis globosa virus	unclassified Prymnesiovirus	Virus				2
ORF283	gene_283|GeneMark.hmm|911_aa|-|295944|298679	1e-43	hypothetical protein	Unknown		Phaeocystis globosa virus	unclassified Prymnesiovirus	Virus				2
ORF284	gene_284|GeneMark.hmm|70_aa|-|298757|298969	0 hits	predicted protein	Unknown				ORFan				1
ORF285	gene_285|GeneMark.hmm|320_aa|-|299079|300041	8e-26	hypothetical protein	Unknown		Phaeocystis globosa virus	unclassified Prymnesiovirus	Virus				2
ORF286	gene_286|GeneMark.hmm|188_aa|-|300112|300678	0.002	predicted protein	Unknown		Phaeocystis globosa virus	unclassified Prymnesiovirus	ORFan				2
ORF287	gene_287|GeneMark.hmm|350_aa|-|300717|301769	0.0003	hypothetical protein	Unknown		Phaeocystis globosa virus	unclassified Prymnesiovirus	Virus				1
ORF288	gene_288|GeneMark.hmm|207_aa|-|301808|302431	2e-85	DNA-directed RNA polymerase II subunit RPB5	Transcription		Phaeocystis globosa virus	unclassified Prymnesiovirus	Virus					ORF288		ORF288
ORF289	gene_289|GeneMark.hmm|227_aa|+|302621|303304	7.1	predicted protein	Unknown				ORFan
ORF290	gene_290|GeneMark.hmm|153_aa|-|303309|303770	4e-12	hypothetical protein	Unknown		Monosiga brevicollis	Monosiga	Eukaryotes	1	1	11	1
ORF291	gene_291|GeneMark.hmm|150_aa|-|303857|304309	3e-21	hypothetical protein	Unknown		Chrysochromulina ericina virus	unclassified Phycodnaviridae	Virus	1	1	10
ORF292	gene_292|GeneMark.hmm|220_aa|-|304406|305068	1e-08	hypothetical protein	Unknown		Pangasianodon hypophthalmus	striped catfish	Eukaryotes
ORF293	gene_293|GeneMark.hmm|237_aa|+|305311|306024	1e-51	Ribonuclease H	Replication		Phaeocystis globosa virus	unclassified Prymnesiovirus	Virus
ORF294	gene_294|GeneMark.hmm|72_aa|+|306099|306317	4e-18	hypothetical protein	Unknown		Chrysochromulina ericina virus	unclassified Phycodnaviridae	Virus
ORF295	gene_295|GeneMark.hmm|255_aa|-|306312|307079	6e-31	ATP-dependent Clp protease, proteolytic subunit	Posttranslational modification	Protease, S14	Chrysochromulina ericina virus	unclassified Phycodnaviridae	Virus	1	1	21
ORF296	gene_296|GeneMark.hmm|276_aa|-|307133|307963	2e-28	proline dehydrogenase	Metabolism	Amino acids	Sphingobacterium psychroaquaticum	Sphingobacterium	Bacteria
ORF297	gene_297|GeneMark.hmm|267_aa|-|308046|308849	1e-65	N-acetylglucosamine-1-phosphate uridyltransferase	Metabolism	Glycan modification; UDP-GlcNAc biosynthesis	Chrysochromulina ericina virus	unclassified Phycodnaviridae	Virus
ORF298	gene_298|GeneMark.hmm|131_aa|-|308886|309281	6e-45	rhodanese-like domain protein	Unknown		Phaeocystis globosa virus	unclassified Prymnesiovirus	Virus
ORF299	gene_299|GeneMark.hmm|101_aa|+|309459|309764	1.7	predicted protein	Unknown				ORFan
ORF300	gene_300|GeneMark.hmm|370_aa|-|309771|310883	1e-33	transcription initiation factor IIB	Transcription		Cavenderia fasciculata	cellular slime mold	Eukaryotes					ORF300	ORF300	ORF300
ORF301	gene_301|GeneMark.hmm|430_aa|+|311048|312340	0.006	predicted protein	Unknown				ORFan
ORF302	gene_302|GeneMark.hmm|197_aa|-|312440|313033	4e-86	hypothetical protein	Unknown		Phaeocystis globosa virus	unclassified Prymnesiovirus	Virus
ORF303	gene_303|GeneMark.hmm|436_aa|+|313131|314441	3e-84	patatin-like phospholipase	Vesicle trafficking		Phaeocystis globosa virus	unclassified Prymnesiovirus	Virus
ORF304	gene_304|GeneMark.hmm|174_aa|-|314474|314998	4e-37	disulfide isomerase (thioredoxin domain-containing)	Metabolism	Respiration chain; Cellular redox balance	Phaeocystis globosa virus	unclassified Prymnesiovirus	Virus				1		ORF304	ORF304
ORF305	gene_305|GeneMark.hmm|204_aa|+|315096|315710	7e-77	ERV/ALR sulfhydryl oxidase	Metabolism	Respiration chain; Cellular redox balance	Phaeocystis globosa virus	unclassified Prymnesiovirus	Virus					ORF305	ORF305	ORF305
ORF306	gene_306|GeneMark.hmm|56_aa|+|315803|315973	2.3	predicted protein	Unknown				ORFan
ORF307	gene_307|GeneMark.hmm|412_aa|-|316172|317410	0.91	predicted protein	Unknown				ORFan	1	1	25
ORF308	gene_308|GeneMark.hmm|236_aa|+|317451|318161	8e-84	Ribonuclease HII	DNA repair and recombination		Phaeocystis globosa virus	unclassified Prymnesiovirus	Virus
ORF309	gene_309|GeneMark.hmm|233_aa|-|318249|318950	5e-26	hypothetical protein	Unknown		Phaeocystis globosa virus	unclassified Prymnesiovirus	Virus
ORF310	gene_310|GeneMark.hmm|279_aa|+|319082|319921	2e-103	aspartyl-tRNA synthetase (class II)	Translation		Prochlorococcus virus PSSM7	Prochlorococcus virus PSSM7	Virus
ORF311	gene_311|GeneMark.hmm|113_aa|+|320305|320646	3e-13	hypothetical protein	Unknown		Emiliania huxleyi	algae	Eukaryotes				3
ORF312	gene_312|GeneMark.hmm|373_aa|+|320735|321856	3e-87	VOG19868； REFSEQ BspA family leucine rich repeat surface protein	Vesicle trafficking		Campylobacter subantarcticus LMG 24374 (prophage?)	Campylobacter	Bacteria
ORF313	gene_313|GeneMark.hmm|298_aa|+|322014|322910	1e-64	VOG19868； REFSEQ BspA family leucine rich repeat surface protein	Vesicle trafficking		Campylobacter subantarcticus LMG 24374 (prophage?)	Campylobacter	Bacteria
ORF314	gene_314|GeneMark.hmm|225_aa|+|323104|323781	7e-84	DNA polymerase III subunit epsilon; Ribonuclease T	Translation		Phaeocystis globosa virus	unclassified Prymnesiovirus	Virus
ORF315	gene_315|GeneMark.hmm|162_aa|-|323967|324455	0 hits	predicted protein	Unknown				ORFan
ORF316	gene_316|GeneMark.hmm|1297_aa|-|324514|328407	0	mRNA capping enzyme	Translation		Phaeocystis globosa virus	unclassified Prymnesiovirus	Virus					ORF316	ORF316	ORF316
ORF317	gene_317|GeneMark.hmm|348_aa|-|328476|329522	1e-23	hypothetical protein	Unknown		Phaeocystis globosa virus	unclassified Prymnesiovirus	Virus
ORF318	gene_318|GeneMark.hmm|167_aa|-|329650|330153	2e-25	hypothetical protein	Unknown		Phaeocystis globosa virus	unclassified Prymnesiovirus	Virus
ORF319	gene_319|GeneMark.hmm|173_aa|-|330233|330754	2e-51	VOG14440; sp|Q5UQW1|YL376_MIMIV Putative DNA-directed RNA polymerase subunit L376	Transcription		Phaeocystis globosa virus	unclassified Prymnesiovirus	Virus
ORF320	gene_320|GeneMark.hmm|1597_aa|-|330809|335602	0	VOG00451; sp|P04308|ETF1_VACCW Early transcription factor 70 kDa subunit	Transcription		Phaeocystis globosa virus	unclassified Prymnesiovirus	Virus					ORF320	ORF320	ORF320
ORF321	gene_321|GeneMark.hmm|268_aa|-|335646|336452	5e-115	mRNA decapping protein	Translation		Phaeocystis globosa virus	unclassified Prymnesiovirus	Virus					ORF321	ORF321	ORF321
ORF322	gene_322|GeneMark.hmm|145_aa|+|336574|337011	2e-56	ERV/ALR sulfhydryl oxidase	Metabolism	Respiration chain; Cellular redox balance	Phaeocystis globosa virus	unclassified Prymnesiovirus	Virus				1	ORF322	ORF322	ORF322
ORF323	gene_323|GeneMark.hmm|199_aa|+|337042|337641	7e-99	HNH endonuclease	Virus morphogenesis		Phaeocystis globosa virus	unclassified Prymnesiovirus	Virus
ORF324	gene_324|GeneMark.hmm|528_aa|+|337702|339288	8e-97	Concanavalin A-like lectin/glucanases	Recognition		Phaeocystis globosa virus	unclassified Prymnesiovirus	Virus				7
ORF325	gene_325|GeneMark.hmm|271_aa|+|339397|340212	1e-78	Concanavalin A-like lectin/glucanases	Recognition		Phaeocystis globosa virus	unclassified Prymnesiovirus	Virus	1	1	20
ORF326	gene_326|GeneMark.hmm|347_aa|+|340303|341346	5e-128	Concanavalin A-like lectin/glucanases	Recognition		Phaeocystis globosa virus	unclassified Prymnesiovirus	Virus				1
ORF327	gene_327|GeneMark.hmm|759_aa|+|341429|343708	3e-34	hypothetical protein	Unknown		Phaeocystis globosa virus	unclassified Prymnesiovirus	Virus
ORF328	gene_328|GeneMark.hmm|1327_aa|+|343879|347862	0	DNA polymerase B	Replication		Phaeocystis globosa virus	unclassified Prymnesiovirus	Virus					ORF328		ORF328
ORF329	gene_329|GeneMark.hmm|442_aa|+|348021|349349	1e-171	aminopeptidase C	Posttranslational modification		Phaeocystis globosa virus	unclassified Prymnesiovirus	Virus
ORF330	gene_330|GeneMark.hmm|92_aa|+|349501|349779	2.8	predicted protein	Unknown				ORFan				3
ORF331	gene_331|GeneMark.hmm|129_aa|+|349877|350266	0.57	predicted protein	Unknown				ORFan
ORF332	gene_332|GeneMark.hmm|245_aa|-|350215|350952	5.2	predicted protein	Unknown				ORFan
ORF333	gene_333|GeneMark.hmm|338_aa|-|350976|351992	4e-24	RING finger protein	Posttranslational modification	Ubiquitination	Phaeocystis globosa virus	unclassified Prymnesiovirus	Virus
ORF334	gene_334|GeneMark.hmm|338_aa|+|352065|353081	3e-139	ubiquitin specific peptidase C19	Posttranslational modification	Protease, C19	Phaeocystis globosa virus	unclassified Prymnesiovirus	Virus
ORF335	gene_335|GeneMark.hmm|272_aa|+|353246|354064	2e-119	extracellular link domain-containing protein	Recognition		Phaeocystis globosa virus	unclassified Prymnesiovirus	Virus				2
ORF336	gene_336|GeneMark.hmm|686_aa|-|354176|356236	0	ATP-dependent zinc metalloprotease	Posttranslational modification		Phaeocystis globosa virus	unclassified Prymnesiovirus	Virus	1	1	23	1
ORF337	gene_337|GeneMark.hmm|172_aa|-|356322|356840	6e-68	hypothetical protein	Unknown		Phaeocystis globosa virus	unclassified Prymnesiovirus	Virus
ORF338	gene_338|GeneMark.hmm|135_aa|-|356886|357293	0.011	predicted protein	Unknown				ORFan
ORF339	gene_339|GeneMark.hmm|124_aa|-|357347|357721	4e-23	hypothetical protein	Unknown		Phaeocystis globosa virus	unclassified Prymnesiovirus	Virus
ORF340	gene_340|GeneMark.hmm|94_aa|-|357847|358131	2	predicted protein	Unknown				ORFan
ORF341	gene_341|GeneMark.hmm|74_aa|-|358199|358423	1e-10	hypothetical protein	Unknown		Phaeocystis globosa virus	unclassified Prymnesiovirus	Virus				2
ORF342	gene_342|GeneMark.hmm|375_aa|+|358600|359727	4e-84	hypothetical protein	Unknown		Phaeocystis globosa virus	unclassified Prymnesiovirus	Virus
ORF343	gene_343|GeneMark.hmm|183_aa|+|359894|360445	2e-54	hypothetical protein	Unknown		Phaeocystis globosa virus	unclassified Prymnesiovirus	Virus	1	1	26		ORF343		ORF343
ORF344	gene_344|GeneMark.hmm|196_aa|+|360510|361100	1e-98	metal-dependent hydrolase	Posttranslational modification	Protease	Phaeocystis globosa virus	unclassified Prymnesiovirus	Virus					ORF344	ORF344	ORF344
ORF345	gene_345|GeneMark.hmm|194_aa|-|361141|361725	6e-49	dihydrofolate reductase	Metabolism	Nucleotides	Phaeocystis globosa virus	unclassified Prymnesiovirus	Virus
ORF346	gene_346|GeneMark.hmm|2343_aa|+|361761|368792	3e-118	hypothetical protein	Unknown		Phaeocystis globosa virus	unclassified Prymnesiovirus	Virus
ORF347	gene_347|GeneMark.hmm|1522_aa|-|368987|373555	0	DNA-directed RNA polymerase II subunit RPB1	Transcription		Phaeocystis globosa virus	unclassified Prymnesiovirus	Virus					ORF347	ORF347	ORF347
ORF348	gene_348|GeneMark.hmm|613_aa|+|373799|375640	0	ATP-dependent protease	Posttranslational modification	Protease	Phaeocystis globosa virus	unclassified Prymnesiovirus	Virus
ORF349	gene_349|GeneMark.hmm|275_aa|-|375681|376508	7e-24	hypothetical protein	Unknown		Phaeocystis globosa virus	unclassified Prymnesiovirus	Virus	1	1	12
ORF350	gene_350|GeneMark.hmm|52_aa|+|376447|376605	0 hits	predicted protein	Unknown				ORFan
ORF351	gene_351|GeneMark.hmm|214_aa|-|376676|377320	9e-36	hypothetical protein	Unknown		Phaeocystis globosa virus	unclassified Prymnesiovirus	Virus	1	1	27
ORF352	gene_352|GeneMark.hmm|303_aa|-|377474|378385	2e-44	hypothetical protein	Unknown		Phaeocystis globosa virus	unclassified Prymnesiovirus	Virus				3
ORF353	gene_353|GeneMark.hmm|177_aa|-|378487|379020	1e-52	hypothetical protein	Unknown		Phaeocystis globosa virus	unclassified Prymnesiovirus	Virus				1
ORF354	gene_354|GeneMark.hmm|141_aa|-|379167|379592	4e-05	hypothetical protein	Unknown		Phaeocystis globosa virus	unclassified Prymnesiovirus	Virus	1	1	45
ORF355	gene_355|GeneMark.hmm|172_aa|+|379650|380168	9e-47	hypothetical protein	Unknown		Phaeocystis globosa virus	unclassified Prymnesiovirus	Virus
ORF356	gene_356|GeneMark.hmm|262_aa|+|380313|381101	0.046	predicted protein	Unknown				ORFan
ORF357	gene_357|GeneMark.hmm|44_aa|+|381221|381355	0.4	predicted protein	Unknown				ORFan
ORF358	gene_358|GeneMark.hmm|108_aa|+|381700|382026	3.6	predicted protein	Unknown				ORFan
ORF359	gene_359|GeneMark.hmm|37_aa|+|382135|382248	0 hits	predicted protein	Unknown				ORFan
ORF360	gene_360|GeneMark.hmm|55_aa|-|382251|382418	0 hits	predicted protein	Unknown				ORFan
ORF361	gene_361|GeneMark.hmm|427_aa|-|382529|383812	6e-59	hypothetical protein	Unknown		Phaeocystis globosa virus	unclassified Prymnesiovirus	Virus
ORF362	gene_362|GeneMark.hmm|76_aa|+|383973|384203	0.66	predicted protein	Unknown				ORFan
ORF363	gene_363|GeneMark.hmm|240_aa|-|384261|384983	9e-18	Phytanoyl-CoA dioxygenase (PhyH)	Metabolism	Light harvesting; Chlorophyll degradation	Pestalotiopsis fici	Pestalotiopsis	Eukaryotes
ORF364	gene_364|GeneMark.hmm|841_aa|+|385148|387673	0	DNA topoisomerase IA	Replication		Chrysochromulina ericina virus	unclassified Phycodnaviridae	Virus
ORF365	gene_365|GeneMark.hmm|270_aa|+|387744|388556	6e-83	Arginase	Metabolism	Amino acids	Chrysochromulina ericina virus	unclassified Phycodnaviridae	Virus
ORF366	gene_366|GeneMark.hmm|587_aa|+|388635|390398	6e-146	putative AAA+ family ATPase; sp|P32839|BCS1_YEAST Mitochondrial chaperone BCS1	Posttranslational modification	chaperone	Chrysochromulina ericina virus	unclassified Phycodnaviridae	Virus				1
ORF367	gene_367|GeneMark.hmm|119_aa|-|390380|390739	1e-18	hypothetical protein	Unknown		Phaeocystis globosa virus	unclassified Prymnesiovirus	Virus				4
ORF368	gene_368|GeneMark.hmm|187_aa|+|390831|391394	8e-106	VOG25351; REFSEQ hemagglutinin domain-containing protein	Vesicle trafficking		Phaeocystis globosa virus	unclassified Prymnesiovirus	Virus
ORF369	gene_369|GeneMark.hmm|226_aa|+|391348|392028	5e-45	phosphoesterase PA-phosphatase related protein	Posttranslational modification	Phosphorylation	Phaeocystis globosa virus	unclassified Prymnesiovirus	Virus	1	1	58
ORF370	gene_370|GeneMark.hmm|193_aa|+|392098|392679	1e-43	thymidine kinase	Metabolism	Nucleotides	Phaeocystis globosa virus	unclassified Prymnesiovirus	Virus
ORF371	gene_371|GeneMark.hmm|334_aa|-|392657|393661	0.0007	hypothetical protein	Unknown		Chrysochromulina ericina virus	unclassified Phycodnaviridae	Virus
ORF372	gene_372|GeneMark.hmm|206_aa|+|393807|394427	5e-45	hypothetical protein	Unknown		Phaeocystis globosa virus	unclassified Prymnesiovirus	Virus				4
ORF373	gene_373|GeneMark.hmm|199_aa|-|394406|395005	7e-26	hypothetical protein	Unknown		Phaeocystis globosa virus	unclassified Prymnesiovirus	Virus
ORF374	gene_374|GeneMark.hmm|387_aa|+|395112|396275	6e-84	hypothetical protein	Unknown		Phaeocystis globosa virus	unclassified Prymnesiovirus	Virus
ORF375	gene_375|GeneMark.hmm|383_aa|+|396323|397474	5e-39	DnaJ-like protein	Posttranslational modification	chaperone	Phaeocystis globosa virus	unclassified Prymnesiovirus	Virus
ORF376	gene_376|GeneMark.hmm|319_aa|-|397582|398541	2e-97	hypothetical protein	Unknown		Phaeocystis globosa virus	unclassified Prymnesiovirus	Virus
ORF377	gene_377|GeneMark.hmm|223_aa|-|399409|400080	3e-61	SWIB-domain-containing protein	Chromatin remodelling		Phaeocystis globosa virus	unclassified Prymnesiovirus	Virus
ORF378	gene_378|GeneMark.hmm|392_aa|-|400293|401471	2e-133	hypothetical protein	Unknown		Phaeocystis globosa virus	unclassified Prymnesiovirus	Virus
ORF379	gene_379|GeneMark.hmm|507_aa|-|401603|403126	4e-55	hypothetical protein	Unknown		Phaeocystis globosa virus	unclassified Prymnesiovirus	Virus
ORF380	gene_380|GeneMark.hmm|79_aa|-|403178|403417	6e-27	hypothetical protein	Unknown		Phaeocystis globosa virus	unclassified Prymnesiovirus	Virus				2
ORF381	gene_381|GeneMark.hmm|339_aa|-|403751|404770	3e-117	hypothetical protein	Unknown		Phaeocystis globosa virus	unclassified Prymnesiovirus	Virus
ORF382	gene_382|GeneMark.hmm|289_aa|-|404831|405700	2e-89	VOG00946; sp|P35250|RFC2_HUMAN Replication factor C subunit 2	Replication		Phaeocystis globosa virus	unclassified Prymnesiovirus	Virus
ORF383	gene_383|GeneMark.hmm|161_aa|+|405766|406251	4e-14	(p)ppGpp synthetase I, SpoT/RelA; GTP diphosphokinase / guanosine-3',5'-bis(diphosphate) 3'-diphosphatase [EC:2.7.6.5 3.1.7.2]	Metabolism	Nucleotides	Melioribacter roseus	Melioribacter	Bacteria
ORF384	gene_384|GeneMark.hmm|137_aa|-|406356|406769	0.67	predicted protein	Unknown				ORFan
ORF385	gene_385|GeneMark.hmm|2288_aa|+|406908|413774	0	hypothetical protein	Unknown		Ostreococcus tauri	Ostreococcus	Eukaryotes
ORF386	gene_386|GeneMark.hmm|168_aa|+|413820|414326	0.0002	hypothetical protein	Unknown		Chrysochromulina ericina virus	unclassified Phycodnaviridae	Virus
ORF387	gene_387|GeneMark.hmm|461_aa|+|414314|415699	1e-147	hypothetical protein	Unknown		Phaeocystis globosa virus	unclassified Prymnesiovirus	Virus
ORF388	gene_388|GeneMark.hmm|299_aa|-|415744|416643	2e-09	hypothetical protein	Unknown		Zygosaccharomyces rouxii	Zygosaccharomyces	Eukaryotes
ORF389	gene_389|GeneMark.hmm|360_aa|-|416747|417829	1e-108	hypothetical protein	Unknown		Phaeocystis globosa virus	unclassified Prymnesiovirus	Virus
ORF390	gene_390|GeneMark.hmm|312_aa|+|417924|418862	4e-111	replication factor C small subunit	Replication		Phaeocystis globosa virus	unclassified Prymnesiovirus	Virus
ORF391	gene_391|GeneMark.hmm|83_aa|-|418846|419097	0 hits	predicted protein	Unknown				ORFan
ORF392	gene_392|GeneMark.hmm|375_aa|+|419336|420463	2e-116	TATA-box binding protein	Transcription		Phaeocystis globosa virus	unclassified Prymnesiovirus	Virus					ORF392		ORF392
ORF393	gene_393|GeneMark.hmm|367_aa|-|420510|421613	6e-11	hypothetical protein	Unknown		Chrysochromulina ericina virus	unclassified Phycodnaviridae	Virus
ORF394	gene_394|GeneMark.hmm|60_aa|-|421668|421850	7.1	predicted protein	Unknown				ORFan
ORF395	gene_395|GeneMark.hmm|596_aa|+|421926|423716	2e-26	tetratricopeptide repeat protein; lipopolysaccharide heptosyltransferase	Metabolism	Glycan modification	Paraburkholderia terrae	Paraburkholderia	Bacteria
ORF396	gene_396|GeneMark.hmm|164_aa|-|423740|424234	9e-63	hypothetical protein	Unknown		Phaeocystis globosa virus	unclassified Prymnesiovirus	Virus					ORF396	ORF396	ORF396
ORF397	gene_397|GeneMark.hmm|132_aa|+|424422|424820	5e-15	hypothetical protein	Unknown		Yellowstone lake mimivirus	unclassified Mimiviridae	Virus	1	1	29
ORF398	gene_398|GeneMark.hmm|1509_aa|+|424920|429449	2e-41	hypothetical protein	Unknown		Phaeocystis globosa virus	unclassified Prymnesiovirus	Virus
ORF399	gene_399|GeneMark.hmm|1519_aa|+|429547|434106	5e-154	hypothetical protein	Unknown		Chrysochromulina ericina virus	unclassified Phycodnaviridae	Virus
ORF400	gene_400|GeneMark.hmm|215_aa|+|434139|434786	1e-22	Methyltransferase	Posttranslational modification	Methylation	Nitrosospira multiformis	Nitrosospira	Bacteria
ORF401	gene_401|GeneMark.hmm|312_aa|+|434825|435763	0.041	predicted protein	Unknown				ORFan
ORF402	gene_402|GeneMark.hmm|35_aa|-|435741|435848	0 hits	predicted protein	Unknown				ORFan
ORF403	gene_403|GeneMark.hmm|265_aa|-|435829|436626	1e-53	hypothetical protein	Unknown		Acanthamoeba castellanii	Acanthamoeba	Eukaryotes
ORF404	gene_404|GeneMark.hmm|186_aa|+|436643|437203	0.54	predicted protein	Unknown				ORFan
ORF405	gene_405|GeneMark.hmm|75_aa|+|437362|437589	1.5	predicted protein	Unknown				ORFan
ORF406	gene_406|GeneMark.hmm|343_aa|-|437614|438645	2e-154	Nucleoside-diphosphate-sugar epimerase	Metabolism	Glycan modification	Breviolum minutum	Breviolum	Eukaryotes
ORF407	gene_407|GeneMark.hmm|279_aa|-|438704|439543	7e-26	putative UDP-glucose 6-dehydrogenase	Metabolism	Glycan modification	Cafeteria roenbergensis virus	Cafeteria roenbergensis virus	Virus
ORF408	gene_408|GeneMark.hmm|130_aa|-|439615|440007	3e-14	VOG00151; sp|P27830|RMLB2_ECOLI dTDP-glucose 4	Metabolism	Glycan modification	Cyanobium sp. NIES-981	marine cyanobacterium	Bacteria
ORF409	gene_409|GeneMark.hmm|320_aa|-|440368|441330	0	dTDP-D-glucose 4,6-dehydratase	Metabolism	Glycan modification; O-antigen biosynthesis	Chrysochromulina ericina virus	unclassified Phycodnaviridae	Virus
ORF410	gene_410|GeneMark.hmm|1161_aa|-|441496|444981	0	DNA gyrase/DNA topoisomerase IV subunit A	Replication		Phaeocystis globosa virus	unclassified Prymnesiovirus	Virus					ORF410	ORF410	ORF410
ORF411	gene_411|GeneMark.hmm|3697_aa|+|445201|456294	1e-90	hypothetical protein	Unknown		Phaeocystis globosa virus	unclassified Prymnesiovirus	Virus
ORF412	gene_412|GeneMark.hmm|546_aa|-|456483|458123	1e-37	hypothetical protein	Unknown		Phaeocystis globosa virus	unclassified Prymnesiovirus	Virus
ORF413	gene_413|GeneMark.hmm|218_aa|-|458280|458936	0.23	hypothetical protein	Unknown				ORFan
ORF414	gene_414|GeneMark.hmm|365_aa|-|459027|460124	2e-55	Tail fiber protein with peptidase domain	Posttranslational modification	Protease, S74	Phaeocystis globosa virus	unclassified Prymnesiovirus	Virus
ORF415	gene_415|GeneMark.hmm|98_aa|+|460246|460542	9e-31	hypothetical protein	Unknown		Chrysochromulina ericina virus	unclassified Phycodnaviridae	Virus
ORF416	gene_416|GeneMark.hmm|110_aa|-|460684|461016	1e-10	hypothetical protein	Unknown		Chrysochromulina ericina virus	unclassified Phycodnaviridae	Virus
ORF417	gene_417|GeneMark.hmm|345_aa|-|461254|462291	9e-97	replication factor C small subunit	Replication		Phaeocystis globosa virus	unclassified Prymnesiovirus	Virus
ORF418	gene_418|GeneMark.hmm|354_aa|+|462348|463412	1e-48	DnaJ superfamily	Posttranslational modification	Chaperone	Phaeocystis globosa virus	unclassified Prymnesiovirus	Virus
ORF419	gene_419|GeneMark.hmm|73_aa|-|463430|463651	0 hits	predicted protein	Unknown				ORFan	1	1	34
ORF420	gene_420|GeneMark.hmm|327_aa|-|463758|464741	2e-131	hypothetical protein	Unknown		Phaeocystis globosa virus	unclassified Prymnesiovirus	Virus
ORF421	gene_421|GeneMark.hmm|635_aa|-|464810|466717	6e-150	Thiamine pyrophosphate enzyme	Metabolism	Coenzyme in mutiple metabolic pathways	Lottia gigantea	owl limpet	Eukaryotes
ORF422	gene_422|GeneMark.hmm|296_aa|-|466803|467693	4e-77	hypothetical protein	Unknown		Phaeocystis globosa virus	unclassified Prymnesiovirus	Virus
ORF423	gene_423|GeneMark.hmm|246_aa|+|467869|468609	7e-32	hypothetical protein	Unknown		Rhodoplanes sp. Z2-YC6860	unclassified Rhodoplanes	Bacteria
ORF424	gene_424|GeneMark.hmm|30_aa|-|468640|468732	0 hits	predicted protein	Unknown				ORFan
ORF425	gene_425|GeneMark.hmm|378_aa|-|468707|469843	2e-68	hypothetical protein	Unknown		Phaeocystis globosa virus	unclassified Prymnesiovirus	Virus
ORF426	gene_426|GeneMark.hmm|169_aa|+|470385|470894	0.11	predicted protein	Unknown				ORFan				6
ORF427	gene_427|GeneMark.hmm|121_aa|+|470977|471342	2e-30	Thioredoxin-containing protein	Metabolism	Respiration chain; Cellular redox balance	Phaeocystis globosa virus	unclassified Prymnesiovirus	Virus						ORF427	ORF427
ORF428	gene_428|GeneMark.hmm|534_aa|-|471395|472999	0	XRN family 5'-3' exonuclease	Translation		Phaeocystis globosa virus	unclassified Prymnesiovirus	Virus
ORF429	gene_429|GeneMark.hmm|1086_aa|+|473248|476508	5e-170	Intein containing ATP-dependent Lon peptidase	Posttranslational modification	Protease, S16	Chrysochromulina ericina virus	unclassified Phycodnaviridae	Virus
ORF430	gene_430|GeneMark.hmm|223_aa|+|476539|477210	4e-47	hypothetical protein	Unknown		Phaeocystis globosa virus	unclassified Prymnesiovirus	Virus				4
ORF431	gene_431|GeneMark.hmm|57_aa|-|477283|477456	0.053	predicted protein	Unknown				ORFan
ORF432	gene_432|GeneMark.hmm|151_aa|-|477447|477902	9e-37	ERV/ALR sulfhydryl oxidase	Metabolism	Respiration chain; Cellular redox balance	Phaeocystis globosa virus	unclassified Prymnesiovirus	Virus					ORF432	ORF432	ORF432
ORF433	gene_433|GeneMark.hmm|237_aa|+|477962|478675	2e-47	Sulfolipid-1-addressing protein	Chromatin remodelling		Phaeocystis globosa virus	unclassified Prymnesiovirus	Virus
ORF434	gene_434|GeneMark.hmm|118_aa|+|478839|479195	5e-37	hypothetical protein	Unknown		Phaeocystis globosa virus	unclassified Prymnesiovirus	Virus
ORF435	gene_435|GeneMark.hmm|68_aa|+|479272|479478	2e-05	hypothetical protein	Unknown		Phaeocystis globosa virus	unclassified Prymnesiovirus	Virus				2
ORF436	gene_436|GeneMark.hmm|286_aa|-|479479|480339	4e-52	hypothetical protein	Unknown		Chrysochromulina ericina virus	unclassified Phycodnaviridae	Virus				2
ORF437	gene_437|GeneMark.hmm|257_aa|+|480432|481205	9e-101	hypothetical protein	Unknown		Phaeocystis globosa virus	unclassified Prymnesiovirus	Virus
ORF438	gene_438|GeneMark.hmm|67_aa|+|481275|481478	5.3	predicted protein	Unknown				ORFan
ORF439	gene_439|GeneMark.hmm|46_aa|+|481691|481831	0 hits	predicted protein	Unknown				ORFan
ORF440	gene_440|GeneMark.hmm|210_aa|+|482015|482647	4e-52	Methyltransferase domain	Posttranslational modification	Methylation	Mycobacterium marseillense	Mycobacterium avium complex (MAC)	Bacteria
ORF441	gene_441|GeneMark.hmm|173_aa|+|482745|483266	4e-59	hypothetical protein	Unknown		Phaeocystis globosa virus	unclassified Prymnesiovirus	Virus
ORF442	gene_442|GeneMark.hmm|188_aa|+|483378|483944	0.065	predicted protein	Unknown				ORFan
ORF443	gene_443|GeneMark.hmm|240_aa|-|483933|484655	4e-32	hypothetical protein	Unknown		Phaeocystis globosa virus	unclassified Prymnesiovirus	Virus
ORF444	gene_444|GeneMark.hmm|187_aa|+|484809|485372	8e-24	hypothetical protein	Unknown		Cavenderia fasciculata	cellular slime mold	Eukaryotes
ORF445	gene_445|GeneMark.hmm|100_aa|-|485369|485671	2	predicted protein	Unknown				ORFan
ORF446	gene_446|GeneMark.hmm|36_aa|-|485781|485891	0 hits	predicted protein	Unknown				ORFan
ORF447	gene_447|GeneMark.hmm|96_aa|-|485891|486181	1.1	predicted protein	Unknown				ORFan
ORF448	gene_448|GeneMark.hmm|142_aa|-|486422|486850	0.0003	high mobility group protein B3	Chromatin remodelling		Artibeus jamaicensis	Jamaican fruit-eating bat	Eukaryotes
ORF449	gene_449|GeneMark.hmm|111_aa|-|488549|488884	0.024	class II HMG-box domain containing protein	Chromatin remodelling				ORFan
ORF450	gene_450|GeneMark.hmm|122_aa|-|488992|489360	5e-07	class II HMG-box domain containing protein	Chromatin remodelling		Chrysochromulina ericina virus	unclassified Phycodnaviridae	Virus
ORF451	gene_451|GeneMark.hmm|135_aa|+|491012|491419	3e-38	disulfide isomerase (thioredoxin domain-containing)	Metabolism	Respiration chain; Cellular redox balance	Chrysochromulina ericina virus	unclassified Phycodnaviridae	Virus	1	1	34			ORF451	ORF451
ORF452	gene_452|GeneMark.hmm|111_aa|-|491425|491760	0.7	predicted protein	Unknown				ORFan
ORF453	gene_453|GeneMark.hmm|271_aa|-|492493|493308	5e-18	hypothetical protein	Unknown		Arthrospira platensis	Arthrospira	Bacteria
ORF454	gene_454|GeneMark.hmm|262_aa|-|493376|494164	3e-96	SAM-dependent methyltransferase	Posttranslational modification	Methylation	Synechococcus virus Bellamy	Synechococcus virus Bellamy	Virus
ORF455	gene_455|GeneMark.hmm|255_aa|-|494190|494957	1e-11	hypothetical protein	Unknown		Geobacter daltonii FRC-32	Geotalea	Bacteria
ORF456	gene_456|GeneMark.hmm|63_aa|+|495028|495219	4	predicted protein	Unknown				ORFan
ORF457	gene_457|GeneMark.hmm|50_aa|-|495359|495511	2.6	predicted protein	Unknown				ORFan	1	1	27
ORF458	gene_458|GeneMark.hmm|87_aa|+|495801|496064	0.002	Glycosyltransferase, family 61	Metabolism		Cyanobacterium sp. HL-69		ORFan
ORF459	gene_459|GeneMark.hmm|303_aa|-|496045|496956	3e-39	hypothetical protein	Unknown		Methanoregula formicica	Methanoregula	Archaea
ORF460	gene_460|GeneMark.hmm|311_aa|-|496992|497927	5e-91	hypothetical protein	Unknown		Synechococcus virus ST4	Synechococcus virus ST4	Virus
ORF461	gene_461|GeneMark.hmm|208_aa|-|497973|498599	3e-24	Methyltransferase FkbM family	Metabolism	Glycan modification	Candidatus Solibacter usitatus	Candidatus Solibacter	Bacteria
ORF462	gene_462|GeneMark.hmm|367_aa|-|498645|499748	1e-130	UDP-glucose/GDP-mannose dehydrogenase	metabolism	Glycan modification	Trichomonas vaginalis	protozoan	Eukaryotes
ORF463	gene_463|GeneMark.hmm|541_aa|-|499910|501535	7e-20	putative glycosyltransferase family 47	Metabolism	Glycan modification	Trypanosoma cruzi	protozoan, Schizotrypanum	Eukaryotes
ORF464	gene_464|GeneMark.hmm|283_aa|-|501691|502542	4e-132	hypothetical protein	Unknown		Chrysochromulina ericina virus	unclassified Phycodnaviridae	Virus
ORF465	gene_465|GeneMark.hmm|58_aa|-|502600|502776	6.2	predicted protein	Unknown				ORFan
ORF466	gene_466|GeneMark.hmm|102_aa|+|503068|503376	1e-20	hypothetical protein	Unknown		Phaeocystis globosa virus	unclassified Prymnesiovirus	Virus
ORF467	gene_467|GeneMark.hmm|136_aa|+|503447|503857	0.066	predicted protein	Unknown				ORFan
ORF468	gene_468|GeneMark.hmm|135_aa|+|504067|504474	2e-29	hypothetical protein	Unknown		Phaeocystis globosa virus	unclassified Prymnesiovirus	Virus
ORF469	gene_469|GeneMark.hmm|199_aa|-|504643|505242	8e-05	protein nanos 1	Translation		Folsomia candida	Folsomia	Eukaryotes
ORF470	gene_470|GeneMark.hmm|832_aa|-|505358|507856	4e-60	hypothetical protein	Unknown		Phaeocystis globosa virus	unclassified Prymnesiovirus	Virus				2
ORF471	gene_471|GeneMark.hmm|304_aa|-|507963|508877	2e-63	deoxyuridine 5'-triphosphate nucleotidohydrolase	Metabolism	Nucleotides	Phaeocystis globosa virus	unclassified Prymnesiovirus	Virus
ORF472	gene_472|GeneMark.hmm|93_aa|+|509043|509324	6e-31	putative nucleoside deaminase	Metabolism	Nucleotides	Phaeocystis globosa virus	unclassified Prymnesiovirus	Virus
ORF473	gene_473|GeneMark.hmm|140_aa|+|509800|510222	2e-61	VOG14608; sp|Q5UPY6|YL300_MIMIV Uncharacterized protein L300; GIY-YIG endonuclease superfamily protein	DNA repair and recombination		Chrysochromulina ericina virus	unclassified Phycodnaviridae	Virus
ORF474	gene_474|GeneMark.hmm|273_aa|-|510173|510994	1e-08	hypothetical protein	Unknown		Phaeocystis globosa virus	unclassified Prymnesiovirus	Virus
ORF475	gene_475|GeneMark.hmm|138_aa|+|511211|511627	3e-06	hypothetical protein	Unknown		Phaeocystis globosa virus	unclassified Prymnesiovirus	Virus
ORF476	gene_476|GeneMark.hmm|499_aa|+|511701|513200	2e-14	VOG04103; sp|P08393|ICP0_HHV11 E3 ubiquitin-protein ligase ICP0	Posttranslational modification	Ubiquitination	Chrysochromulina ericina virus	unclassified Phycodnaviridae	Virus
ORF477	gene_477|GeneMark.hmm|547_aa|-|513205|514848	2e-39	hypothetical protein	Unknown		Phaeocystis globosa virus	unclassified Prymnesiovirus	Virus
ORF478	gene_478|GeneMark.hmm|57_aa|+|515118|515291	1e-06	hypothetical protein	Unknown		Phaeocystis globosa virus	unclassified Prymnesiovirus	Virus
ORF479	gene_479|GeneMark.hmm|524_aa|+|515518|517092	1e-119	hypothetical protein	Unknown		Phaeocystis globosa virus	unclassified Prymnesiovirus	Virus
ORF480	gene_480|GeneMark.hmm|1132_aa|-|517316|520714	0	NAD-dependent DNA ligase	Replication		Phaeocystis globosa virus	unclassified Prymnesiovirus	Virus
ORF481	gene_481|GeneMark.hmm|193_aa|+|520810|521391	2e-06	hypothetical protein	Unknown		Nilaparvata lugens	brown planthopper	Eukaryotes
ORF482	gene_482|GeneMark.hmm|136_aa|-|521491|521901	0.15	predicted protein	Unknown				ORFan
ORF483	gene_483|GeneMark.hmm|421_aa|+|522097|523362	1e-10	hypothetical protein	Unknown		Phaeocystis globosa virus	unclassified Prymnesiovirus	Virus				1
ORF484	gene_484|GeneMark.hmm|117_aa|+|523387|523740	2e-18	EamA-like transporter	Resistance	Ion channel	Phaeocystis globosa virus	unclassified Prymnesiovirus	Virus				4
ORF485	gene_485|GeneMark.hmm|313_aa|-|523737|524678	5e-33	hypothetical protein	Unknown		Phaeocystis globosa virus	unclassified Prymnesiovirus	Virus
ORF486	gene_486|GeneMark.hmm|199_aa|+|524865|525464	3e-25	hypothetical protein	Unknown		Phaeocystis globosa virus	unclassified Prymnesiovirus	Virus
ORF487	gene_487|GeneMark.hmm|132_aa|-|525481|525879	6e-12	hypothetical protein	Unknown		Chrysochromulina ericina virus	unclassified Phycodnaviridae	Virus
ORF488	gene_488|GeneMark.hmm|62_aa|+|526078|526266	2.7	predicted protein	Unknown				ORFan
ORF489	gene_489|GeneMark.hmm|244_aa|+|526413|527147	4e-39	DUF1599 domain-containing protein	Metabolism	Nucleotides; putative nucleotide modification	Phaeocystis globosa virus	unclassified Prymnesiovirus	Virus
ORF490	gene_490|GeneMark.hmm|678_aa|-|527248|529284	0	ELP3-like acetyltransferase	Posttranslational modification	Acetylation	Phaeocystis globosa virus	unclassified Prymnesiovirus	Virus
ORF491	gene_491|GeneMark.hmm|440_aa|+|529574|530896	8e-98	hypothetical protein	Unknown		Phaeocystis globosa virus	unclassified Prymnesiovirus	Virus
ORF492	gene_492|GeneMark.hmm|212_aa|-|530936|531574	3e-12	putative CLP_protease	Posttranslational modification	Protease, S14	Phaeocystis globosa virus	unclassified Prymnesiovirus	Virus
ORF493	gene_493|GeneMark.hmm|148_aa|+|531849|532295	6e-25	hypothetical protein	Unknown		Phaeocystis globosa virus	unclassified Prymnesiovirus	Virus
ORF494	gene_494|GeneMark.hmm|164_aa|+|532393|532887	1e-33	putative Nudix hydrolase	Translation		Phaeocystis globosa virus	unclassified Prymnesiovirus	Virus
ORF495	gene_495|GeneMark.hmm|209_aa|-|532907|533536	4e-06	hypothetical protein	Unknown		Bombyx mori	domestic silkworm	Eukaryotes
ORF496	gene_496|GeneMark.hmm|215_aa|+|533637|534284	4	predicted protein	Unknown				ORFan
ORF497	gene_497|GeneMark.hmm|456_aa|+|534393|535763	2e-154	DNA methyltrasferase	Resistance	Restriction-modification system	Phaeocystis globosa virus	unclassified Prymnesiovirus	Virus
ORF498	gene_498|GeneMark.hmm|193_aa|-|535774|536355	3e-07	hypothetical protein	Unknown		Esox lucius	northern pike	Eukaryotes
ORF499	gene_499|GeneMark.hmm|84_aa|+|536507|536761	3.1	DnaJ-like protein	Posttranslational modification	chaperone			ORFan
ORF500	gene_500|GeneMark.hmm|656_aa|-|536889|538859	2e-62	2-polyprenylphenol 6-hydroxylase	Metabolism	Respiration chain; CoQ (ubiquinone) biosynthesis in mitochondria	Phaeocystis globosa virus	unclassified Prymnesiovirus	Virus
ORF501	gene_501|GeneMark.hmm|204_aa|+|539109|539723	8e-26	hypothetical protein	Unknown		Phaeocystis globosa virus	unclassified Prymnesiovirus	Virus
ORF502	gene_502|GeneMark.hmm|189_aa|+|539821|540390	2e-28	hypothetical protein	Unknown		Phaeocystis globosa virus	unclassified Prymnesiovirus	Virus
ORF503	gene_503|GeneMark.hmm|243_aa|-|540433|541164	3e-106	hypothetical protein	Unknown		Chrysochromulina ericina virus	unclassified Phycodnaviridae	Virus				2
ORF504	gene_504|GeneMark.hmm|700_aa|+|541260|543362	0.0008	hypothetical protein	Unknown		Manis javanica	Malayan pangolin	Eukaryotes
ORF505	gene_505|GeneMark.hmm|157_aa|+|543416|543889	1.4	predicted protein	Unknown				ORFan				4
ORF506	gene_506|GeneMark.hmm|224_aa|-|543914|544588	0.04	predicted protein	Unknown				ORFan				2
ORF507	gene_507|GeneMark.hmm|791_aa|+|544765|547140	0	U-box and intein containing von Willebrand factor type A	Posttranslational modification	Ubiquitination	Chrysochromulina ericina virus	unclassified Phycodnaviridae	Virus
ORF508	gene_508|GeneMark.hmm|652_aa|+|547388|549346	0	heat shock 70kDa protein	Posttranslational modification	chaperone	Xenopus tropicalis	western clawed frog	Eukaryotes
ORF509	gene_509|GeneMark.hmm|241_aa|-|549393|550118	0.036	predicted protein	Unknown				ORFan	1	1	21	1
ORF510	gene_510|GeneMark.hmm|307_aa|-|550169|551092	8e-12	putative prenyltransferase protein	Posttranslational modification	Prenylation	Chrysochromulina ericina virus	unclassified Phycodnaviridae	Virus				8
ORF511	gene_511|GeneMark.hmm|289_aa|-|551162|552031	0 hits	predicted protein	Unknown				ORFan
ORF512	gene_512|GeneMark.hmm|299_aa|-|552081|552980	2e-92	Phytanoyl-CoA dioxygenase	Metabolism	Light harvesting; Chlorophyll degradation	Chrysochromulina ericina virus	unclassified Phycodnaviridae	Virus
ORF513	gene_513|GeneMark.hmm|85_aa|+|553057|553314	8	predicted protein	Unknown				ORFan
ORF514	gene_514|GeneMark.hmm|650_aa|-|553324|555276	0.002	predicted protein	Unknown				ORFan	1	1	24
ORF515	gene_515|GeneMark.hmm|336_aa|+|555342|556352	2e-07	hypothetical protein	Unknown		Plasmodium falciparum 3D7	Plasmodium (Laverania)	Eukaryotes	1	1	20
ORF516	gene_516|GeneMark.hmm|162_aa|-|556355|556843	0.001	EamA-like transporter	Resistance	Ion channel	Phaeocystis globosa virus	unclassified Prymnesiovirus	Virus				5
ORF517	gene_517|GeneMark.hmm|66_aa|+|556968|557168	0.067	predicted protein	Unknown				ORFan
ORF518	gene_518|GeneMark.hmm|213_aa|-|557165|557806	0.005	predicted protein	Unknown				ORFan
ORF519	gene_519|GeneMark.hmm|164_aa|+|557968|558462	3e-33	DnaJ-like protein	Posttranslational modification	chaperone	Phaeocystis globosa virus	unclassified Prymnesiovirus	Virus
ORF520	gene_520|GeneMark.hmm|179_aa|+|558488|559027	0.028	predicted protein	Unknown				ORFan	1	1	22
ORF521	gene_521|GeneMark.hmm|95_aa|+|559095|559382	3e-11	hypothetical protein	Unknown		Chrysochromulina ericina virus	unclassified Phycodnaviridae	Virus
ORF522	gene_522|GeneMark.hmm|187_aa|-|559468|560031	0.003	VOG17623, sp|Q9Q8T2|LAP_RFVKA E3 ubiquitin-protein ligase LAP	Posttranslational modification	Ubiquitination			ORFan				2
ORF523	gene_523|GeneMark.hmm|78_aa|-|560094|560330	6e-26	hypothetical protein	Unknown		Chrysochromulina ericina virus	unclassified Phycodnaviridae	Virus	1	1	15
ORF524	gene_524|GeneMark.hmm|297_aa|+|560451|561344	0.14	predicted protein	Unknown				ORFan
ORF525	gene_525|GeneMark.hmm|562_aa|+|561750|563438	9e-05	hypothetical protein	Unknown		Phaeocystis globosa virus	unclassified Prymnesiovirus	Virus
ORF526	gene_526|GeneMark.hmm|223_aa|+|563492|564163	0.21	predicted protein	Unknown				ORFan
ORF527	gene_527|GeneMark.hmm|82_aa|-|564266|564514	2.4	predicted protein	Unknown				ORFan				1
ORF528	gene_528|GeneMark.hmm|332_aa|-|564611|565609	3e-72	hypothetical protein	Unknown		Phaeocystis globosa virus	unclassified Prymnesiovirus	Virus
ORF529	gene_529|GeneMark.hmm|54_aa|+|565691|565855	0 hits	predicted protein	Unknown				ORFan
ORF530	gene_530|GeneMark.hmm|583_aa|+|565919|567670	1e-08	hypothetical protein	Unknown		Phaeocystis globosa virus	unclassified Prymnesiovirus	Virus
ORF531	gene_531|GeneMark.hmm|275_aa|+|567748|568575	6e-127	hypothetical protein	Unknown		Emiliania huxleyi	algae	Eukaryotes
ORF532	gene_532|GeneMark.hmm|111_aa|-|568637|568972	2e-37	Fe-S cluster assembly scaffold protein	Metabolism	Respiration chain; Fe-S cluster biosynthesis	Chrysochromulina ericina virus	unclassified Phycodnaviridae	Virus
ORF533	gene_533|GeneMark.hmm|33_aa|+|569048|569149	0 hits	predicted protein	Unknown				ORFan
ORF534	gene_534|GeneMark.hmm|75_aa|+|569199|569426	1	predicted protein	Unknown				ORFan
ORF535	gene_535|GeneMark.hmm|183_aa|-|569704|570255	0.002	predicted protein	Unknown				ORFan				4
ORF536	gene_536|GeneMark.hmm|127_aa|+|570279|570662	0.9	predicted protein	Unknown				ORFan				3
ORF537	gene_537|GeneMark.hmm|58_aa|+|570924|571100	9	predicted protein	Unknown				ORFan	1	1	25
ORF538	gene_538|GeneMark.hmm|505_aa|+|571314|572831	0 hits	predicted protein	Unknown				ORFan
ORF539	gene_539|GeneMark.hmm|1086_aa|+|573026|576286	1e-07	hypothetical protein	Unknown		Plasmodium vivax	Plasmodium (Plasmodium)	Eukaryotes
ORF540	gene_540|GeneMark.hmm|191_aa|+|576458|577033	1.4	lipid-sensing domain protein	Vesicle trafficking				ORFan				7
ORF541	gene_541|GeneMark.hmm|299_aa|+|577198|578097	6e-98	site-specific DNA methyltransferase	Resistance	Restriction-modification system	Yellowstone lake mimivirus	unclassified Mimiviridae	Virus
ORF542	gene_542|GeneMark.hmm|194_aa|-|578072|578656	8e-29	hypothetical protein	Unknown		Tokyovirus A1	unclassified Marseillevirus	Virus
ORF543	gene_543|GeneMark.hmm|533_aa|+|578892|580493	5.9	predicted protein	Unknown				ORFan
ORF544	gene_544|GeneMark.hmm|77_aa|-|580622|580855	0.81	predicted protein	Unknown				ORFan
ORF545	gene_545|GeneMark.hmm|37_aa|+|582028|582138	0 hits	predicted protein	Unknown				ORFan	1	1	15

## Sheet: PkV-RF02
ORF	Description	E-value	Annotation	Functional distribution	Biological process	Organism	Taxonomy	Origin	SP	SP_start	SP_end	TM	NCLDVs	All-to-all blastp	Core genes
ORF1	gene_1|GeneMark.hmm|629_aa|-|2|1888	2e-20	hypothetical protein	Unknown		Salmonella virus Sasha	Sashavirus	Virus
ORF2	gene_2|GeneMark.hmm|201_aa|-|1959|2564	2e-07	HNH endonuclease	Virus morphogenesis		Aquimarina sp. AD10	unclassified Aquimarina	Bacteria
ORF3	gene_3|GeneMark.hmm|68_aa|-|2537|2743	8.4	predicted protein	Unknown				ORFan
ORF4	gene_4|GeneMark.hmm|52_aa|-|2906|3064	0.42	predicted protein	Unknown				ORFan
ORF5	gene_5|GeneMark.hmm|127_aa|-|3246|3629	0.17	predicted protein	Unknown				ORFan
ORF6	gene_6|GeneMark.hmm|123_aa|-|3683|4054	1.4	predicted protein	Unknown				ORFan				3
ORF7	gene_7|GeneMark.hmm|198_aa|+|4143|4739	2e-27	hypothetical protein	Unknown		Tokyovirus A1	unclassified Marseillevirus	Virus
ORF8	gene_8|GeneMark.hmm|299_aa|-|4714|5613	3e-96	site-specific DNA methyltransferase	Resistance	Restriction-modification system	Yellowstone lake mimivirus	unclassified Mimiviridae	Virus
ORF9	gene_9|GeneMark.hmm|111_aa|+|6033|6368	2e-06	hypothetical protein	Unknown		Micromonas pusilla virus 12T	unclassified Prasinovirus	Virus				3
ORF10	gene_10|GeneMark.hmm|96_aa|-|6411|6701	1.8	predicted protein	Unknown				ORFan
ORF11	gene_11|GeneMark.hmm|68_aa|+|7294|7500	0.91	predicted protein	Unknown				ORFan				2
ORF12	gene_12|GeneMark.hmm|143_aa|-|8080|8511	2e-06	VOG17623, sp|Q9Q8T2|LAP_RFVKA E3 ubiquitin-protein ligase LAP	Posttranslational modification	Ubiquitination, E3	Phaeocystis globosa virus	unclassified Prymnesiovirus	Virus				2
ORF13	gene_13|GeneMark.hmm|99_aa|+|8646|8945	2.6	predicted protein	Unknown				ORFan
ORF14	gene_14|GeneMark.hmm|40_aa|+|8920|9042	0 hits	predicted protein	Unknown				ORFan	1	1	28
ORF15	gene_15|GeneMark.hmm|42_aa|-|9045|9173	7.7	predicted protein	Unknown				ORFan
ORF16	gene_16|GeneMark.hmm|422_aa|-|9281|10549	2e-31	beta-1,3-glucan-binding protein	Metabolism	Glycan modification	Lingula anatina	brachiopods	Eukaryotes	1	1	10
ORF17	gene_17|GeneMark.hmm|258_aa|+|10840|11616	2e-17	transmembrane BAX inhibitor motif-containing protein	Resistance	Inhibition of apoptosis	Verticillium alfalfae	fungus	Eukaryotes				7
ORF18	gene_18|GeneMark.hmm|322_aa|+|11876|12844	2e-73	hypothetical protein	Unknown		Phaeocystis globosa virus	unclassified Prymnesiovirus	Virus
ORF19	gene_19|GeneMark.hmm|151_aa|+|12886|13341	0.0002	VOG17623, sp|Q9Q8T2|LAP_RFVKA E3 ubiquitin-protein ligase LAP	Posttranslational modification	Ubiquitination, E3	Phaeocystis globosa virus	unclassified Prymnesiovirus	Virus				2
ORF20	gene_20|GeneMark.hmm|105_aa|+|13412|13729	0.91	predicted protein	Unknown				ORFan
ORF21	gene_21|GeneMark.hmm|73_aa|+|13666|13887	2.5	predicted protein	Unknown				ORFan
ORF22	gene_22|GeneMark.hmm|122_aa|+|13966|14334	1.8	predicted protein	Unknown				ORFan
ORF23	gene_23|GeneMark.hmm|126_aa|+|14796|15176	2e-56	VOG14608; sp|Q5UPY6|YL300_MIMIV Uncharacterized protein L300; GIY-YIG endonuclease superfamily protein	DNA repair and recombination		Chrysochromulina ericina virus	unclassified Phycodnaviridae	Virus
ORF24	gene_24|GeneMark.hmm|84_aa|-|15164|15418	5e-36	hypothetical protein	Unknown		Phaeocystis globosa virus	unclassified Prymnesiovirus	Virus
ORF25	gene_25|GeneMark.hmm|49_aa|-|15423|15572	1.7	predicted protein	Unknown				ORFan
ORF26	gene_26|GeneMark.hmm|166_aa|-|15640|16140	2e-37	DnaJ-like protein	Posttranslational modification	chaperone	Phaeocystis globosa virus	unclassified Prymnesiovirus	Virus
ORF27	gene_27|GeneMark.hmm|32_aa|+|16126|16224	0 hits	predicted protein	Unknown				ORFan
ORF28	gene_28|GeneMark.hmm|386_aa|+|16234|17394	6e-125	tRNA-Ile-lysidine synthetase	Translation		Phaeocystis globosa virus	unclassified Prymnesiovirus	Virus
ORF29	gene_29|GeneMark.hmm|212_aa|+|17433|18071	0.059	predicted protein	Unknown				ORFan
ORF30	gene_30|GeneMark.hmm|102_aa|-|18068|18376	0.004	predicted protein	Unknown				ORFan
ORF31	gene_31|GeneMark.hmm|147_aa|+|18434|18877	8e-05	EamA-like transporter	Resistance	Ion channel	Phaeocystis globosa virus	unclassified Prymnesiovirus	Virus				5
ORF32	gene_32|GeneMark.hmm|84_aa|-|18874|19128	4.9	predicted protein	Unknown				ORFan
ORF33	gene_33|GeneMark.hmm|317_aa|+|19196|20149	5e-90	Phytanoyl-CoA dioxygenase	Metabolism	Light harvesting; Chlorophyll degradation	Chrysochromulina ericina virus	unclassified Phycodnaviridae	Virus
ORF34	gene_34|GeneMark.hmm|122_aa|-|20176|20544	6e-24	hypothetical protein	Unknown		Phaeocystis globosa virus	unclassified Prymnesiovirus	Virus				3
ORF35	gene_35|GeneMark.hmm|121_aa|-|20574|20939	6e-41	putative permease	Resistance	Ion channel	Phaeocystis globosa virus	unclassified Prymnesiovirus	Virus				4
ORF36	gene_36|GeneMark.hmm|228_aa|+|21171|21857	0.006	HNH endonuclease	Virus morphogenesis		Bacteriovorax stolpii		ORFan
ORF37	gene_37|GeneMark.hmm|249_aa|-|21869|22618	2e-12	putative NUDIX hydrolase	Translation		Rhodococcus coprophilus	bacteria	Bacteria
ORF38	gene_38|GeneMark.hmm|209_aa|+|22725|23354	5e-06	hypothetical protein	Unknown		Mus caroli	Ryukyu mouse	Eukaryotes	1	1	31	1
ORF39	gene_39|GeneMark.hmm|704_aa|-|23356|25470	0	heat shock 70 kDa protein	Posttranslational modification	chaperone	Esox lucius	northern pike	Eukaryotes
ORF40	gene_40|GeneMark.hmm|81_aa|-|25470|25715	5.8	predicted protein	Unknown				ORFan
ORF41	gene_41|GeneMark.hmm|768_aa|-|25825|28131	0	U-box and intein containing von Willebrand factor type A	Posttranslational modification	Ubiquitination, E3	Chrysochromulina ericina virus	unclassified Phycodnaviridae	Virus
ORF42	gene_42|GeneMark.hmm|209_aa|+|28446|29075	1e-89	SAM-dependent methyltransferase	Translation		Chrysochromulina ericina virus	unclassified Phycodnaviridae	Virus
ORF43	gene_43|GeneMark.hmm|255_aa|+|29146|29913	0.17	predicted protein	Unknown				ORFan				2
ORF44	gene_44|GeneMark.hmm|162_aa|-|29910|30398	2	predicted protein	Unknown				ORFan
ORF45	gene_45|GeneMark.hmm|156_aa|-|30440|30910	0.074	predicted protein	Unknown		Caenorhabditis elegans (nematode)	.	ORFan				4
ORF46	gene_46|GeneMark.hmm|402_aa|+|30986|32194	4e-26	hypothetical protein	Unknown		Chrysochromulina ericina virus	unclassified Phycodnaviridae	Virus
ORF47	gene_47|GeneMark.hmm|1568_aa|+|32272|36978	0 hits	predicted protein	Unknown				ORFan	1	1	10
ORF48	gene_48|GeneMark.hmm|1556_aa|+|37100|41770	6e-06	LOW QUALITY PROTEIN: uncharacterized protein LOC100166039	Recognition		Acyrthosiphon pisum	pea aphid	Eukaryotes	1	1	25
ORF49	gene_49|GeneMark.hmm|421_aa|+|41915|43180	0.67	predicted protein	Unknown				ORFan
ORF50	gene_50|GeneMark.hmm|204_aa|+|43669|44283	0 hits	predicted protein	Unknown				ORFan
ORF51	gene_51|GeneMark.hmm|69_aa|+|44334|44543	0.58	EzrA domian containing protein	Resistance	Cell cycle regulation			ORFan
ORF52	gene_52|GeneMark.hmm|69_aa|+|44591|44800	0.69	predicted protein	Unknown				ORFan
ORF53	gene_53|GeneMark.hmm|300_aa|+|44841|45743	0 hits	predicted protein	Unknown				ORFan
ORF54	gene_54|GeneMark.hmm|240_aa|+|45823|46545	4e-91	hypothetical protein	Unknown		Chrysochromulina ericina virus	unclassified Phycodnaviridae	Virus				2
ORF55	gene_55|GeneMark.hmm|515_aa|-|46548|48095	2e-87	hypothetical protein	Unknown		Phaeocystis globosa virus	unclassified Prymnesiovirus	Virus
ORF56	gene_56|GeneMark.hmm|165_aa|-|48183|48680	2e-40	hypothetical protein	Unknown		Phaeocystis globosa virus	unclassified Prymnesiovirus	Virus
ORF57	gene_57|GeneMark.hmm|193_aa|-|48725|49306	2e-50	hypothetical protein	Unknown		Phaeocystis globosa virus	unclassified Prymnesiovirus	Virus
ORF58	gene_58|GeneMark.hmm|505_aa|+|49388|50905	2e-100	2-polyprenylphenol 6-hydroxylase	Metabolism	Respiration chain; CoQ (ubiquinone) biosynthesis in mitochondria	Phaeocystis globosa virus	unclassified Prymnesiovirus	Virus
ORF59	gene_59|GeneMark.hmm|76_aa|-|50907|51137	0.0007	DnaJ-like protein	Posttranslational modification	chaperone	Phaeocystis globosa virus	unclassified Prymnesiovirus	Virus
ORF60	gene_60|GeneMark.hmm|103_aa|+|51374|51685	0.72	hypothetical protein	Unknown				ORFan
ORF61	gene_61|GeneMark.hmm|462_aa|-|51680|53068	4e-160	DNA methyltrasferase	Resistance	Restriction-modification system	Phaeocystis globosa virus	unclassified Prymnesiovirus	Virus
ORF62	gene_62|GeneMark.hmm|169_aa|-|53133|53642	4e-44	putative Nudix hydrolase	Translation		Phaeocystis globosa virus	unclassified Prymnesiovirus	Virus
ORF63	gene_63|GeneMark.hmm|206_aa|-|53788|54408	7e-27	hypothetical protein	Unknown		Phaeocystis globosa virus	unclassified Prymnesiovirus	Virus
ORF64	gene_64|GeneMark.hmm|237_aa|+|54661|55374	3.9	predicted protein	Unknown				ORFan
ORF65	gene_65|GeneMark.hmm|82_aa|-|55398|55646	2.8	predicted protein	Unknown				ORFan
ORF66	gene_66|GeneMark.hmm|211_aa|+|55765|56400	5e-21	putative CLP_protease	Posttranslational modification	Protease, S14	Phaeocystis globosa virus	unclassified Prymnesiovirus	Virus
ORF67	gene_67|GeneMark.hmm|447_aa|-|56397|57740	2e-125	hypothetical protein	Unknown		Phaeocystis globosa virus	unclassified Prymnesiovirus	Virus
ORF68	gene_68|GeneMark.hmm|631_aa|+|57864|59759	0	ELP3-like acetyltransferase	Posttranslational modification	Acetylation	Phaeocystis globosa virus	unclassified Prymnesiovirus	Virus
ORF69	gene_69|GeneMark.hmm|129_aa|-|59791|60180	3e-15	S-adenosylmethionine decarboxylase related protein	Metabolism	polyamine biosynthesis	Methanolacinia petrolearia	Methanomicrobiaceae	Archaea
ORF70	gene_70|GeneMark.hmm|84_aa|-|60237|60491	0 hits	predicted protein	Unknown				ORFan
ORF71	gene_71|GeneMark.hmm|120_aa|-|60538|60900	6e-47	DUF1599 domain-containing protein	Metabolism	Nucleotides; putative nucleotide modification	Phaeocystis globosa virus	unclassified Prymnesiovirus	Virus
ORF72	gene_72|GeneMark.hmm|29_aa|-|60984|61073	1.2	predicted protein	Unknown				ORFan	1	1	19
ORF73	gene_73|GeneMark.hmm|93_aa|-|61324|61605	8e-05	putative poly [ADP-ribose] polymerase 11	Posttranslational modification	poly(ADP-ribosyl)ation	Oreochromis niloticus	Nile tilapia	Eukaryotes
ORF74	gene_74|GeneMark.hmm|114_aa|-|61665|62009	0.31	predicted protein	Unknown				ORFan
ORF75	gene_75|GeneMark.hmm|452_aa|+|62039|63397	0.49	putative Calcineurin-like phosphoesterase	resistance	Inhibition of host cell signal transduction			ORFan
ORF76	gene_76|GeneMark.hmm|210_aa|-|63399|64031	6e-47	hypothetical protein	Unknown		Phaeocystis globosa virus	unclassified Prymnesiovirus	Virus
ORF77	gene_77|GeneMark.hmm|276_aa|+|64105|64935	2e-54	hypothetical protein	Unknown		Phaeocystis globosa virus	unclassified Prymnesiovirus	Virus
ORF78	gene_78|GeneMark.hmm|166_aa|+|65015|65515	0.78	predicted protein	Unknown				ORFan
ORF79	gene_79|GeneMark.hmm|538_aa|+|65599|67215		hypothetical protein	Unknown				ORFan
ORF80	gene_80|GeneMark.hmm|148_aa|+|67398|67844	0 hits	predicted protein	Unknown				ORFan
ORF81	gene_81|GeneMark.hmm|56_aa|-|67778|67948	0 hits	predicted protein	Unknown				ORFan				1
ORF82	gene_82|GeneMark.hmm|188_aa|+|68258|68824	1e-12	hypothetical protein	Unknown		Chrysochromulina ericina virus	unclassified Phycodnaviridae	Virus	1	1	12	2
ORF83	gene_83|GeneMark.hmm|213_aa|-|68827|69468	0.0001	hypothetical protein	Unknown		Myotis brandtii	Brandt's bat	Eukaryotes
ORF84	gene_84|GeneMark.hmm|1116_aa|-|69529|72879	0	NAD-dependent DNA ligase	Replication		Phaeocystis globosa virus	unclassified Prymnesiovirus	Virus
ORF85	gene_85|GeneMark.hmm|112_aa|+|72953|73291	2.9	predicted protein	Unknown				ORFan
ORF86	gene_86|GeneMark.hmm|134_aa|-|73293|73697	0.69	predicted protein	Unknown				ORFan
ORF87	gene_87|GeneMark.hmm|367_aa|+|73772|74875	1.2	predicted protein	Unknown				ORFan
ORF88	gene_88|GeneMark.hmm|299_aa|+|75013|75912	0.54	predicted protein	Unknown				ORFan
ORF89	gene_89|GeneMark.hmm|121_aa|+|75961|76326	0.33	predicted protein	Unknown				ORFan	1	1	10
ORF90	gene_90|GeneMark.hmm|316_aa|+|76557|77507	2e-17	hypothetical protein	Unknown		Phaeocystis globosa virus	unclassified Prymnesiovirus	Virus				1
ORF91	gene_91|GeneMark.hmm|57_aa|-|77504|77677	0.002	hypothetical protein	Unknown		Phaeocystis globosa virus	unclassified Prymnesiovirus	ORFan
ORF92	gene_92|GeneMark.hmm|127_aa|-|77844|78227	6e-25	predicted protein	Unknown		Phaeocystis globosa virus	unclassified Prymnesiovirus	Virus
ORF93	gene_93|GeneMark.hmm|503_aa|+|78304|79815	3e-43	protein kinase	Posttranslational modification	Phosphorylation	Phaeocystis globosa virus	unclassified Prymnesiovirus	Virus
ORF94	gene_94|GeneMark.hmm|510_aa|-|79871|81403	3e-06	VOG04103; sp|P08393|ICP0_HHV11 E3 ubiquitin-protein ligase ICP0	Posttranslational modification	Ubiquitination, E3	Helobdella robusta	leech	Eukaryotes
ORF95	gene_95|GeneMark.hmm|167_aa|-|81428|81931	0.04	predicted protein	Unknown		Phaeocystis globosa virus	unclassified Prymnesiovirus	ORFan
ORF96	gene_96|GeneMark.hmm|142_aa|-|81976|82404	0.01	hypothetical protein	Unknown		Phaeocystis globosa virus	unclassified Prymnesiovirus	ORFan
ORF97	gene_97|GeneMark.hmm|225_aa|+|82526|83203	6e-18	hypothetical protein	Unknown		Phaeocystis globosa virus	unclassified Prymnesiovirus	Virus
ORF98	gene_98|GeneMark.hmm|162_aa|-|83243|83731	5e-22	predicted protein	Unknown		Phaeocystis globosa virus	unclassified Prymnesiovirus	Virus
ORF99	gene_99|GeneMark.hmm|88_aa|-|83757|84023	7e-36	putative nucleoside deaminase	Metabolism	Nucleotides	Phaeocystis globosa virus	unclassified Prymnesiovirus	Virus
ORF100	gene_100|GeneMark.hmm|286_aa|+|84143|85003	4e-51	deoxyuridine 5'-triphosphate nucleotidohydrolase	Metabolism	Nucleotides	Phaeocystis globosa virus	unclassified Prymnesiovirus	Virus
ORF101	gene_101|GeneMark.hmm|708_aa|+|85055|87181	3e-75	hypothetical protein	Unknown		Phaeocystis globosa virus	unclassified Prymnesiovirus	Virus				3
ORF102	gene_102|GeneMark.hmm|136_aa|+|87285|87695	0.002	protein nanos 1	Translation		Danaus plexippus (monarch butterfly)		ORFan
ORF103	gene_103|GeneMark.hmm|161_aa|+|88010|88495	7e-30	hypothetical protein	Unknown		Phaeocystis globosa virus	unclassified Prymnesiovirus	Virus
ORF104	gene_104|GeneMark.hmm|130_aa|+|88677|89069	0.94	predicted protein	Unknown				ORFan
ORF105	gene_105|GeneMark.hmm|104_aa|-|89074|89388	1e-16	hypothetical protein	Unknown		Phaeocystis globosa virus	unclassified Prymnesiovirus	Virus
ORF106	gene_106|GeneMark.hmm|36_aa|-|89659|89769	0 hits	predicted protein	Unknown				ORFan
ORF107	gene_107|GeneMark.hmm|74_aa|+|91163|91387	0.57	predicted protein	Unknown				ORFan
ORF108	gene_108|GeneMark.hmm|58_aa|-|91382|91558	0 hits	predicted protein	Unknown				ORFan
ORF109	gene_109|GeneMark.hmm|104_aa|-|91741|92055	1 hits	predicted protein	Unknown				ORFan
ORF110	gene_110|GeneMark.hmm|98_aa|-|92277|92573	1.3	predicted protein	Unknown				ORFan
ORF111	gene_111|GeneMark.hmm|62_aa|+|92682|92870	0.001	hypothetical protein	Unknown		Chrysochromulina ericina virus	unclassified Phycodnaviridae	Virus
ORF112	gene_112|GeneMark.hmm|126_aa|+|93253|93633	0.0004	class II HMG-box domain containing protein	Chromatin remodelling		Chrysochromulina ericina virus	unclassified Phycodnaviridae	Virus
ORF113	gene_113|GeneMark.hmm|128_aa|+|94027|94413	3e-05	class II HMG-box domain containing protein	Chromatin remodelling		Debaryomyces hansenii	yeast	Eukaryotes
ORF114	gene_114|GeneMark.hmm|132_aa|+|94663|95061	7.8	predicted protein	Unknown				ORFan
ORF115	gene_115|GeneMark.hmm|144_aa|+|95510|95944	0.13	predicted protein	Unknown				ORFan
ORF116	gene_116|GeneMark.hmm|134_aa|+|96424|96828	0.001	transmembrane E3 ubiquitin-protein ligase	Posttranslational modification	Ubiquitination, E3	Trichomonas vaginalis	protozoan	Eukaryotes				1
ORF117	gene_117|GeneMark.hmm|119_aa|-|96901|97260	1e-39	cold-shock domain family protein	Posttranslational modification	chaperone	Phaeocystis globosa virus	unclassified Prymnesiovirus	Virus
ORF118	gene_118|GeneMark.hmm|202_aa|+|97329|97937	6e-14	hypothetical protein	Unknown		Phaeocystis globosa virus	unclassified Prymnesiovirus	Virus
ORF119	gene_119|GeneMark.hmm|259_aa|-|97934|98713	2e-72	CK1 family protein kinase	Posttranslational modification	Phosphorylation	Phaeocystis globosa virus	unclassified Prymnesiovirus	Virus
ORF120	gene_120|GeneMark.hmm|287_aa|-|98907|99770	6e-98	Cupin-like domain-containing protein	Chromatin remodelling		Phaeocystis globosa virus	unclassified Prymnesiovirus	Virus
ORF121	gene_121|GeneMark.hmm|283_aa|-|99843|100694	4	predicted protein	Unknown				ORFan
ORF122	gene_122|GeneMark.hmm|305_aa|-|100734|101651	1e-156	thymidylate synthase	Metabolism	Nucleotides	Phaeocystis globosa virus	unclassified Prymnesiovirus	Virus
ORF123	gene_123|GeneMark.hmm|245_aa|+|101747|102484	1e-99	hypothetical protein	Unknown		Phaeocystis globosa virus	unclassified Prymnesiovirus	Virus				3
ORF124	gene_124|GeneMark.hmm|314_aa|-|102538|103482	0.0002	hypothetical protein	Unknown		Phaeocystis globosa virus	unclassified Prymnesiovirus	Virus				7
ORF125	gene_125|GeneMark.hmm|326_aa|-|103512|104492	3e-80	hypothetical protein	Unknown		Phaeocystis globosa virus	unclassified Prymnesiovirus	Virus
ORF126	gene_126|GeneMark.hmm|160_aa|+|104720|105202	2e-32	hypothetical protein	Unknown		Phaeocystis globosa virus	unclassified Prymnesiovirus	Virus				4
ORF127	gene_127|GeneMark.hmm|252_aa|-|105177|105935	2e-41	hypothetical protein	Unknown		Phaeocystis globosa virus	unclassified Prymnesiovirus	Virus
ORF128	gene_128|GeneMark.hmm|138_aa|-|105990|106406	2e-52	hypothetical protein	Unknown		Phaeocystis globosa virus	unclassified Prymnesiovirus	Virus
ORF129	gene_129|GeneMark.hmm|112_aa|+|106458|106796	2e-25	hypothetical protein	Unknown		Phaeocystis globosa virus	unclassified Prymnesiovirus	Virus
ORF130	gene_130|GeneMark.hmm|214_aa|-|106793|107437	1.9	predicted protein	Unknown				ORFan
ORF131	gene_131|GeneMark.hmm|576_aa|-|107486|109216	0	asparagine synthetase	Metabolism	Amino acids	Phaeocystis globosa virus	unclassified Prymnesiovirus	Virus
ORF132	gene_132|GeneMark.hmm|164_aa|+|109274|109768	4e-51	hypothetical protein	Unknown		Phaeocystis globosa virus	unclassified Prymnesiovirus	Virus
ORF133	gene_133|GeneMark.hmm|157_aa|+|109784|110257	2e-09	hypothetical protein	Unknown		Phaeocystis globosa virus	unclassified Prymnesiovirus	Virus
ORF134	gene_134|GeneMark.hmm|389_aa|+|110282|111451	1e-115	SUMO-1-specific cysteine protease	Posttranslational modification	Protease, C48	Phaeocystis globosa virus	unclassified Prymnesiovirus	Virus						ORF134	ORF134
ORF135	gene_135|GeneMark.hmm|296_aa|+|111516|112406	1e-22	hypothetical protein	Unknown		Phaeocystis globosa virus	unclassified Prymnesiovirus	Virus
ORF136	gene_136|GeneMark.hmm|55_aa|-|112393|112560	0 hits	predicted protein	Unknown				ORFan
ORF137	gene_137|GeneMark.hmm|43_aa|-|112538|112669	4.2	predicted protein	Unknown				ORFan
ORF138	gene_138|GeneMark.hmm|844_aa|-|112635|115169	0	VOG00451; sp|P04308|ETF1_VACCW Early transcription factor 70 kDa subunit	Transcription		Phaeocystis globosa virus	unclassified Prymnesiovirus	Virus					ORF138		ORF138
ORF139	gene_139|GeneMark.hmm|315_aa|-|115282|116229	4e-160	Ribonuclease III	Translation		Phaeocystis globosa virus	unclassified Prymnesiovirus	Virus
ORF140	gene_140|GeneMark.hmm|108_aa|+|116501|116827	3e-07	hypothetical protein	Unknown		Phaeocystis globosa virus	unclassified Prymnesiovirus	Virus
ORF141	gene_141|GeneMark.hmm|280_aa|+|116897|117739	3e-75	ERCC4-type DNA repair nuclease	DNA repair and recombination		Phaeocystis globosa virus	unclassified Prymnesiovirus	Virus
ORF142	gene_142|GeneMark.hmm|160_aa|+|117786|118268	3e-32	hypothetical protein	Unknown		Phaeocystis globosa virus	unclassified Prymnesiovirus	Virus	1	1	29
ORF143	gene_143|GeneMark.hmm|163_aa|+|118315|118806	0.37	Predicted protein	Unknown				ORFan				2
ORF144	gene_144|GeneMark.hmm|226_aa|+|119071|119751	3e-13	Bacteriorhodopsin-like protein	Metabolism	Light harvesting	Phaeocystis globosa virus	unclassified Prymnesiovirus	Virus				7
ORF145	gene_145|GeneMark.hmm|124_aa|+|119768|120142	0.91	predicted protein	Unknown				ORFan
ORF146	gene_146|GeneMark.hmm|222_aa|-|120329|120997	4e-77	hypothetical protein	Unknown		Phaeocystis globosa virus	unclassified Prymnesiovirus	Virus	1	1	21
ORF147	gene_147|GeneMark.hmm|249_aa|-|121057|121806	6e-40	hypothetical protein	Unknown		Phaeocystis globosa virus	unclassified Prymnesiovirus	Virus				1
ORF148	gene_148|GeneMark.hmm|360_aa|+|121898|122980	1e-131	hypothetical protein	Unknown		Phaeocystis globosa virus	unclassified Prymnesiovirus	Virus
ORF149	gene_149|GeneMark.hmm|72_aa|+|123065|123283	3e-08	hypothetical protein	Unknown		Phaeocystis globosa virus	unclassified Prymnesiovirus	Virus
ORF150	gene_150|GeneMark.hmm|162_aa|+|123352|123840	1.7	predicted protein	Unknown				ORFan
ORF151	gene_151|GeneMark.hmm|332_aa|+|124046|125044	5	predicted protein	Unknown				ORFan
ORF152	gene_152|GeneMark.hmm|57_aa|-|125041|125214	0.0001	t-SNARE family protein	Vesicle trafficking		Dictyostelium discoideum	cellular slime mold	Eukaryotes
ORF153	gene_153|GeneMark.hmm|87_aa|-|125338|125601	8e-11	DDE_3 domian containing protein	Unknown		Rhizobiales bacterium NRL2	unclassified Hyphomicrobiales	Bacteria
ORF154	gene_154|GeneMark.hmm|352_aa|-|125728|126786	1e-135	hypothetical protein	Unknown		Phaeocystis globosa virus	unclassified Prymnesiovirus	Virus
ORF155	gene_155|GeneMark.hmm|327_aa|+|126850|127833	3e-86	methyltransferase	Metabolism	Respiration chain; Plastoquinol biosynthesis	Phaeocystis globosa virus	unclassified Prymnesiovirus	Virus
ORF156	gene_156|GeneMark.hmm|208_aa|-|127889|128515	2e-35	hypothetical protein	Unknown		Phaeocystis globosa virus	unclassified Prymnesiovirus	Virus				1
ORF157	gene_157|GeneMark.hmm|161_aa|+|128596|129081	2e-55	EF-hand-containing protein	Posttranslational modification	Phosphorylation	Phaeocystis globosa virus	unclassified Prymnesiovirus	Virus				2
ORF158	gene_158|GeneMark.hmm|745_aa|+|129122|131359	8e-26	hypothetical protein	Unknown		Phaeocystis globosa virus	unclassified Prymnesiovirus	Virus
ORF159	gene_159|GeneMark.hmm|270_aa|-|131360|132172	2e-82	RNase H PIN (5'-3' exonuclease) domain	Replication		Phaeocystis globosa virus	unclassified Prymnesiovirus	Virus
ORF160	gene_160|GeneMark.hmm|40_aa|-|132234|132356	0 hits	predicted protein	Unknown				ORFan
ORF161	gene_161|GeneMark.hmm|583_aa|-|132824|134575	7e-110	2-polyprenylphenol 6-hydroxylase	Metabolism	Respiration chain; CoQ (ubiquinone) biosynthesis in mitochondria	Phaeocystis globosa virus	unclassified Prymnesiovirus	Virus
ORF162	gene_162|GeneMark.hmm|225_aa|-|134594|135271	2e-65	hypothetical protein	Unknown		Phaeocystis globosa virus	unclassified Prymnesiovirus	Virus
ORF163	gene_163|GeneMark.hmm|287_aa|-|135330|136193	6e-100	glycosyltransferase, family 25	Resistance	Lysis, endlysin	Phaeocystis globosa virus	unclassified Prymnesiovirus	Virus
ORF164	gene_164|GeneMark.hmm|262_aa|+|136296|137084	4e-13	VOG00752; sp|P41436|IAP_GVCPM Apoptosis inhibitor IAP	Resistance	Inhibition of apoptosis	Kryptolebias marmoratus	mangrove rivulus	Eukaryotes
ORF165	gene_165|GeneMark.hmm|140_aa|-|137118|137540	0 hits	predicted protein	Unknown				ORFan
ORF166	gene_166|GeneMark.hmm|494_aa|-|137598|139082	0	hypothetical protein	Unknown		Phaeocystis globosa virus	unclassified Prymnesiovirus	Virus					ORF166		ORF166
ORF167	gene_167|GeneMark.hmm|267_aa|-|139140|139943	9e-100	Putative Holliday junction resolvase	DNA repair and recombination		Phaeocystis globosa virus	unclassified Prymnesiovirus	Virus					ORF167	ORF167	ORF167
ORF168	gene_168|GeneMark.hmm|52_aa|+|140054|140212	3.4	predicted protein	Unknown				ORFan
ORF169	gene_169|GeneMark.hmm|138_aa|-|140405|140821	7e-42	hypothetical protein	Unknown		Phaeocystis globosa virus	unclassified Prymnesiovirus	Virus
ORF170	gene_170|GeneMark.hmm|289_aa|-|140860|141729	2e-15	hypothetical protein	Unknown		Phaeocystis globosa virus	unclassified Prymnesiovirus	Virus				1
ORF171	gene_171|GeneMark.hmm|617_aa|-|141818|143671	0	MutS 8-like protein	DNA repair and recombination		Phaeocystis globosa virus	unclassified Prymnesiovirus	Virus				2
ORF172	gene_172|GeneMark.hmm|366_aa|+|143776|144876	5e-51	hypothetical protein	Unknown		Phaeocystis globosa virus	unclassified Prymnesiovirus	Virus
ORF173	gene_173|GeneMark.hmm|102_aa|-|144879|145187	0.84	predicted protein	Unknown				ORFan
ORF174	gene_174|GeneMark.hmm|697_aa|+|145300|147393	4e-176	hypothetical protein	Unknown		Phaeocystis globosa virus	unclassified Prymnesiovirus	Virus
ORF175	gene_175|GeneMark.hmm|770_aa|+|147470|149782	2e-06	predicted protein	Unknown		Austrofundulus limnaeus	annual killifish	Eukaryotes
ORF176	gene_176|GeneMark.hmm|466_aa|+|149838|151238	2e-91	hypothetical protein	Unknown		Phaeocystis globosa virus	unclassified Prymnesiovirus	Virus
ORF177	gene_177|GeneMark.hmm|365_aa|+|151289|152386	1e-110	hypothetical protein	Unknown		Phaeocystis globosa virus	unclassified Prymnesiovirus	Virus
ORF178	gene_178|GeneMark.hmm|231_aa|+|152522|153217	2e-68	SWIB-domain-containing protein	Chromatin remodelling		Phaeocystis globosa virus	unclassified Prymnesiovirus	Virus
ORF179	gene_179|GeneMark.hmm|310_aa|+|153555|154487	2e-103	hypothetical protein	Unknown		Phaeocystis globosa virus	unclassified Prymnesiovirus	Virus
ORF180	gene_180|GeneMark.hmm|361_aa|-|154595|155680	5e-64	DnaJ-like protein	Posttranslational modification	chaperone	Phaeocystis globosa virus	unclassified Prymnesiovirus	Virus
ORF181	gene_181|GeneMark.hmm|343_aa|-|155670|156701	6e-103	hypothetical protein	Unknown		Phaeocystis globosa virus	unclassified Prymnesiovirus	Virus
ORF182	gene_182|GeneMark.hmm|162_aa|+|156788|157276	5e-44	hypothetical protein	Unknown		Phaeocystis globosa virus	unclassified Prymnesiovirus	Virus
ORF183	gene_183|GeneMark.hmm|211_aa|-|157262|157897	6e-66	hypothetical protein	Unknown		Phaeocystis globosa virus	unclassified Prymnesiovirus	Virus				5
ORF184	gene_184|GeneMark.hmm|316_aa|+|157972|158922	0.0002	hypothetical protein	Unknown		Acanthocystis turfacea chlorella virus 1	Chlorovirus	Virus
ORF185	gene_185|GeneMark.hmm|105_aa|+|159022|159339	6e-08	hypothetical protein	Unknown		Phaeocystis globosa virus	unclassified Prymnesiovirus	Virus
ORF186	gene_186|GeneMark.hmm|213_aa|-|159345|159986	1e-40	thymidine kinase	Metabolism	Nucleotides	Phaeocystis globosa virus	unclassified Prymnesiovirus	Virus
ORF187	gene_187|GeneMark.hmm|41_aa|+|160070|160195	0 hits	predicted protein	Unknown				ORFan
ORF188	gene_188|GeneMark.hmm|34_aa|-|160281|160385	0 hits	predicted protein	Unknown				ORFan
ORF189	gene_189|GeneMark.hmm|63_aa|+|160371|160562	0 hits	predicted protein	Unknown				ORFan
ORF190	gene_190|GeneMark.hmm|114_aa|-|160566|160910	6e-08	hypothetical protein	Unknown		Chrysochromulina ericina virus	unclassified Phycodnaviridae	Virus
ORF191	gene_191|GeneMark.hmm|91_aa|-|161021|161296	0 hits	predicted protein	Unknown				ORFan
ORF192	gene_192|GeneMark.hmm|121_aa|+|161365|161730	0.62	predicted protein	Unknown				ORFan
ORF193	gene_193|GeneMark.hmm|338_aa|-|161740|162756	5e-14	RING finger protein	Posttranslational modification	Ubiquitination, E3	Phaeocystis globosa virus	unclassified Prymnesiovirus	Virus
ORF194	gene_194|GeneMark.hmm|355_aa|+|162779|163846	2e-166	ubiquitin specific peptidase C19	Posttranslational modification	Protease, C19	Phaeocystis globosa virus	unclassified Prymnesiovirus	Virus
ORF195	gene_195|GeneMark.hmm|269_aa|+|163891|164700	3e-117	extracellular link domain-containing protein	Recognition		Phaeocystis globosa virus	unclassified Prymnesiovirus	Virus				2
ORF196	gene_196|GeneMark.hmm|32_aa|-|164675|164773	0 hits	predicted protein	Unknown				ORFan
ORF197	gene_197|GeneMark.hmm|269_aa|+|164794|165603	2e-24	proline dehydrogenase	Metabolism	Amino acids	Ostreococcus lucimarinus	algae	Eukaryotes
ORF198	gene_198|GeneMark.hmm|281_aa|-|165609|166454	0.096	predicted protein	Unknown				ORFan
ORF199	gene_199|GeneMark.hmm|245_aa|+|166788|167525	9e-82	deoxynucleoside kinase	Metabolism	Nucleotides	Phaeocystis globosa virus	unclassified Prymnesiovirus	Virus
ORF200	gene_200|GeneMark.hmm|712_aa|+|167603|169741	0	K04079 molecular chaperone HtpG	Posttranslational modification	chaperone	Emiliania huxleyi	algae	Eukaryotes
ORF201	gene_201|GeneMark.hmm|217_aa|-|169745|170398	1e-14	hypothetical protein	Unknown		Phaeocystis globosa virus	unclassified Prymnesiovirus	Virus
ORF202	gene_202|GeneMark.hmm|248_aa|-|170497|171243	3e-09	hypothetical protein	Unknown		Phaeocystis globosa virus	unclassified Prymnesiovirus	Virus				2
ORF203	gene_203|GeneMark.hmm|171_aa|-|171263|171778	3e-18	hypothetical protein	Unknown		Pseudopropionibacterium propionicum	Gram-positive species of bacteria	Bacteria
ORF204	gene_204|GeneMark.hmm|1026_aa|+|171838|174918	0	VOG00451; sp|P04308|ETF1_VACCW Early transcription factor 70 kDa subunit	Transcription		Phaeocystis globosa virus	unclassified Prymnesiovirus	Virus					ORF204		ORF204
ORF205	gene_205|GeneMark.hmm|269_aa|+|174958|175767	3e-41	ATP-dependent Clp protease, proteolytic subunit	Posttranslational modification	Protease, S14	Chrysochromulina ericina virus	unclassified Phycodnaviridae	Virus	1	1	23
ORF206	gene_206|GeneMark.hmm|73_aa|-|175773|175994	7.7	predicted protein	Unknown				ORFan				1
ORF207	gene_207|GeneMark.hmm|260_aa|+|176104|176886	0 hits	predicted protein	Unknown				ORFan
ORF208	gene_208|GeneMark.hmm|220_aa|-|176896|177558	2e-75	Uracil-DNA glycosylase	DNA repair and recombination		Chrysochromulina ericina virus	unclassified Phycodnaviridae	Virus
ORF209	gene_209|GeneMark.hmm|95_aa|+|177626|177913	6e-07	hypothetical protein	Unknown		Phaeocystis globosa virus	unclassified Prymnesiovirus	Virus
ORF210	gene_210|GeneMark.hmm|134_aa|-|177958|178362	1e-16	Ribonuclease H	Replication		Tetrahymena thermophila	protozoan	Eukaryotes
ORF211	gene_211|GeneMark.hmm|2122_aa|-|178444|184812	0	hypothetical protein	Unknown		Phaeocystis globosa virus	unclassified Prymnesiovirus	Virus
ORF212	gene_212|GeneMark.hmm|172_aa|+|184850|185368	1e-53	dihydrofolate reductase	Metabolism	Nucleotides	Phaeocystis globosa virus	unclassified Prymnesiovirus	Virus
ORF213	gene_213|GeneMark.hmm|196_aa|-|185356|185946	2e-98	metal-dependent hydrolase	Posttranslational modification	Protease	Phaeocystis globosa virus	unclassified Prymnesiovirus	Virus					ORF213	ORF213	ORF213
ORF214	gene_214|GeneMark.hmm|169_aa|-|185982|186491	3e-46	hypothetical protein	Unknown		Phaeocystis globosa virus	unclassified Prymnesiovirus	Virus	1	1	30		ORF214		ORF214
ORF215	gene_215|GeneMark.hmm|386_aa|-|186567|187727	4e-93	hypothetical protein	Unknown		Phaeocystis globosa virus	unclassified Prymnesiovirus	Virus
ORF216	gene_216|GeneMark.hmm|77_aa|+|187875|188108	0.059	predicted protein	Unknown				ORFan
ORF217	gene_217|GeneMark.hmm|118_aa|+|188171|188527	2e-24	hypothetical protein	Unknown		Phaeocystis globosa virus	unclassified Prymnesiovirus	Virus
ORF218	gene_218|GeneMark.hmm|83_aa|+|188570|188821	0.002	hypothetical protein	Unknown		Phaeocystis globosa virus	unclassified Prymnesiovirus	ORFan
ORF219	gene_219|GeneMark.hmm|227_aa|-|188849|189532	1e-37	hypothetical protein	Unknown		Phaeocystis globosa virus	unclassified Prymnesiovirus	Virus
ORF220	gene_220|GeneMark.hmm|90_aa|+|189640|189912	0 hits	predicted protein	Unknown				ORFan
ORF221	gene_221|GeneMark.hmm|157_aa|-|189909|190382	3e-14	hypothetical protein	Unknown		Chrysochromulina ericina virus	unclassified Phycodnaviridae	Virus
ORF222	gene_222|GeneMark.hmm|173_aa|+|190489|191010	6e-72	Transcription elongation factor TFIIS_C	Transcription		Phaeocystis globosa virus	unclassified Prymnesiovirus	Virus						ORF222	ORF222
ORF223	gene_223|GeneMark.hmm|551_aa|-|191007|192662	1e-21	BspA type Leucine rich repeat protein	Vesicle trafficking		Aureococcus anophagefferens virus	unclassified Phycodnaviridae	Virus
ORF224	gene_224|GeneMark.hmm|626_aa|-|192706|194586	2e-41	hypothetical protein	Unknown		Desulfitobacterium metallireducens	Desulfitobacterium	Bacteria				1
ORF225	gene_225|GeneMark.hmm|257_aa|-|194645|195418	3e-50	DNA-directed RNA polymerase II subunit RPB6	Transcription		Phaeocystis globosa virus	unclassified Prymnesiovirus	Virus					ORF225	ORF225	ORF225
ORF226	gene_226|GeneMark.hmm|123_aa|-|195486|195857	6e-37	DNA-directed RNA polymerase subunit M like protein	Transcription		Phaeocystis globosa virus	unclassified Prymnesiovirus	Virus						ORF226	ORF226
ORF227	gene_227|GeneMark.hmm|251_aa|-|196100|196855	1e-66	ubiquitin-conjugating enzyme E2	Posttranslational modification	Ubiquitination, E2	Phaeocystis globosa virus	unclassified Prymnesiovirus	Virus
ORF228	gene_228|GeneMark.hmm|943_aa|+|196958|199789	0	D5 family helicase	Replication		Phaeocystis globosa virus	unclassified Prymnesiovirus	Virus					ORF228	ORF228	ORF228
ORF229	gene_229|GeneMark.hmm|267_aa|+|199843|200646	0.045	predicted protein	Unknown				ORFan
ORF230	gene_230|GeneMark.hmm|280_aa|-|200846|201688	7e-29	hypothetical protein	Unknown		Phaeocystis globosa virus	unclassified Prymnesiovirus	Virus				2
ORF231	gene_231|GeneMark.hmm|72_aa|-|201746|201964	4.4	predicted protein	Unknown				ORFan	1	1	25
ORF232	gene_232|GeneMark.hmm|799_aa|-|202025|204424	2e-55	hypothetical protein	Unknown		Phaeocystis globosa virus	unclassified Prymnesiovirus	Virus				2
ORF233	gene_233|GeneMark.hmm|74_aa|-|204512|204736	0.099	predicted protein	Unknown				ORFan				1
ORF234	gene_234|GeneMark.hmm|492_aa|-|204765|206243	9e-11	hypothetical protein	Unknown		Phaeocystis globosa virus	unclassified Prymnesiovirus	Virus	1	1	33	2
ORF235	gene_235|GeneMark.hmm|89_aa|-|206298|206567	1.8	predicted protein	Unknown				ORFan				2
ORF236	gene_236|GeneMark.hmm|332_aa|-|206595|207593	6e-42	hypothetical protein	Unknown		Phaeocystis globosa virus	unclassified Prymnesiovirus	Virus				1
ORF237	gene_237|GeneMark.hmm|209_aa|-|207641|208270	7e-88	DNA-directed RNA polymerase II subunit RPB5	Transcription		Phaeocystis globosa virus	unclassified Prymnesiovirus	Virus					ORF237		ORF237
ORF238	gene_238|GeneMark.hmm|1461_aa|-|208346|212731	0	DNA-directed RNA polymerase II subunit RPB2; DNA-directed RNA polymerase II subunit RPB2	Transcription		Phaeocystis globosa virus	unclassified Prymnesiovirus	Virus					ORF238		ORF238
ORF239	gene_239|GeneMark.hmm|110_aa|-|212827|213159	2e-47	hypothetical protein	Unknown		Phaeocystis globosa virus	unclassified Prymnesiovirus	Virus				3
ORF240	gene_240|GeneMark.hmm|99_aa|-|213243|213542	0.5	predicted protein	Unknown				ORFan
ORF241	gene_241|GeneMark.hmm|77_aa|-|213618|213851	7e-34	DNA-directed RNA polymerase, subunit N/RPB10; DNA-directed RNA polymerases I, II, and III subunit RPABC5	Transcription		Chrysochromulina ericina virus	unclassified Phycodnaviridae	Virus
ORF242	gene_242|GeneMark.hmm|52_aa|-|213923|214081	0 hits	predicted protein	Unknown				ORFan	1	1	31
ORF243	gene_243|GeneMark.hmm|40_aa|-|214174|214296	0 hits	predicted protein	Unknown				ORFan
ORF244	gene_244|GeneMark.hmm|341_aa|+|214647|215672	2e-43	VOG02173; REFSEQ MutT/NUDIX hydrolase family protein	Translation		Bombus terrestris	buff-tailed bumblebee	Eukaryotes
ORF245	gene_245|GeneMark.hmm|1511_aa|-|215730|220265	0	DNA-directed RNA polymerase II subunit RPB1	Transcription		Phaeocystis globosa virus	unclassified Prymnesiovirus	Virus					ORF245	ORF245	ORF245
ORF246	gene_246|GeneMark.hmm|637_aa|+|220461|222374	0	ATP-dependent protease	Posttranslational modification	Protease	Phaeocystis globosa virus	unclassified Prymnesiovirus	Virus
ORF247	gene_247|GeneMark.hmm|72_aa|+|222441|222659	0.61	UBA domain-containing protein	Posttranslational modification	Ubiquitination, E1			ORFan
ORF248	gene_248|GeneMark.hmm|332_aa|+|223110|224108	7e-86	hypothetical protein	Unknown		Phaeocystis globosa virus	unclassified Prymnesiovirus	Virus
ORF249	gene_249|GeneMark.hmm|244_aa|-|224121|224855	2.2	predicted protein	Unknown				ORFan	1	1	17
ORF250	gene_250|GeneMark.hmm|171_aa|-|224924|225439	6e-56	hypothetical protein	Unknown		Phaeocystis globosa virus	unclassified Prymnesiovirus	Virus
ORF251	gene_251|GeneMark.hmm|158_aa|+|225494|225970	0 hits	predicted protein	Unknown				ORFan				1
ORF252	gene_252|GeneMark.hmm|178_aa|+|226063|226599	4e-66	hypothetical protein	Unknown		Phaeocystis globosa virus	unclassified Prymnesiovirus	Virus	1	1	28
ORF253	gene_253|GeneMark.hmm|301_aa|+|226657|227562	5e-51	hypothetical protein	Unknown		Phaeocystis globosa virus	unclassified Prymnesiovirus	Virus				3
ORF254	gene_254|GeneMark.hmm|170_aa|+|227604|228116	2e-45	hypothetical protein	Unknown		Phaeocystis globosa virus	unclassified Prymnesiovirus	Virus	1	1	21
ORF255	gene_255|GeneMark.hmm|264_aa|+|228166|228960	0.0003	predicted protein	Unknown		Myotis brandtii	Brandt's bat	Eukaryotes
ORF256	gene_256|GeneMark.hmm|238_aa|+|229016|229732	3e-39	hypothetical protein	Unknown		Phaeocystis globosa virus	unclassified Prymnesiovirus	Virus	1	1	20
ORF257	gene_257|GeneMark.hmm|226_aa|-|229736|230416	3e-18	Phytanoyl-CoA dioxygenase	Metabolism	Light harvesting; Chlorophyll degradation	Komagataella phaffii	yeast	Eukaryotes
ORF258	gene_258|GeneMark.hmm|811_aa|+|230512|232947	0	DNA topoisomerase IA	Replication		Phaeocystis globosa virus	unclassified Prymnesiovirus	Virus
ORF259	gene_259|GeneMark.hmm|38_aa|-|233294|233410	0 hits	predicted protein	Unknown				ORFan	1	1	24
ORF260	gene_260|GeneMark.hmm|114_aa|-|233504|233848	3e-35	Fe-S cluster assembly scaffold protein	Metabolism	Respiration chain; Fe-S cluster biosynthesis	Chrysochromulina ericina virus	unclassified Phycodnaviridae	Virus
ORF261	gene_261|GeneMark.hmm|267_aa|+|233963|234766	3e-27	Arginase	Metabolism	Amino acids	Naegleria gruberi	protozoan	Eukaryotes
ORF262	gene_262|GeneMark.hmm|123_aa|+|234770|235141	2e-28	hypothetical protein	Unknown		Phaeocystis globosa virus	unclassified Prymnesiovirus	Virus				4
ORF263	gene_263|GeneMark.hmm|78_aa|+|235134|235370	4e-30	Fe-S cluster assembly scaffold IscU; nitrogen fixation protein NifU and related proteins	Metabolism	Respiration chain; Fe-S cluster biosynthesis	Pulveribacter suum	Pulveribacter, gram-negative	Bacteria
ORF264	gene_264|GeneMark.hmm|46_aa|+|235395|235535	5e-14	Fe-S cluster assembly scaffold IscU; nitrogen fixation protein NifU and related proteins	Metabolism	Respiration chain; Fe-S cluster biosynthesis	Tetrahymena thermophila	protozoan	Eukaryotes
ORF265	gene_265|GeneMark.hmm|1294_aa|-|235570|239454	0	DNA polymerase B	Replication		Phaeocystis globosa virus	unclassified Prymnesiovirus	Virus					ORF265		ORF265
ORF266	gene_266|GeneMark.hmm|973_aa|-|239553|242474	5e-91	hypothetical protein	Unknown		Phaeocystis globosa virus	unclassified Prymnesiovirus	Virus
ORF267	gene_267|GeneMark.hmm|329_aa|-|242540|243529	1e-106	Concanavalin A-like lectin/glucanases	Recognition		Phaeocystis globosa virus	unclassified Prymnesiovirus	Virus				1
ORF268	gene_268|GeneMark.hmm|292_aa|-|243583|244461	4e-69	Concanavalin A-like lectin/glucanases	Recognition		Phaeocystis globosa virus	unclassified Prymnesiovirus	Virus	1	1	21
ORF269	gene_269|GeneMark.hmm|474_aa|-|244517|245941	1e-92	Concanavalin A-like lectin/glucanases	Recognition		Phaeocystis globosa virus	unclassified Prymnesiovirus	Virus				5
ORF270	gene_270|GeneMark.hmm|199_aa|-|245990|246589	2e-96	HNH endonuclease	Virus morphogenesis		Phaeocystis globosa virus	unclassified Prymnesiovirus	Virus
ORF271	gene_271|GeneMark.hmm|143_aa|-|246618|247049	2e-50	ERV/ALR sulfhydryl oxidase	Metabolism	Respiration chain; Cellular redox balance	Phaeocystis globosa virus	unclassified Prymnesiovirus	Virus	1	1	24	1	ORF271	ORF271	ORF271
ORF272	gene_272|GeneMark.hmm|273_aa|+|247179|248000	9e-122	mRNA decapping protein	Translation		Phaeocystis globosa virus	unclassified Prymnesiovirus	Virus					ORF272	ORF272	ORF272
ORF273	gene_273|GeneMark.hmm|1347_aa|+|248008|252051	0	VOG00451; sp|P04308|ETF1_VACCW Early transcription factor 70 kDa subunit	Transcription		Phaeocystis globosa virus	unclassified Prymnesiovirus	Virus					ORF273	ORF273	ORF273
ORF274	gene_274|GeneMark.hmm|159_aa|+|252142|252621	3e-49	VOG14440; sp|Q5UQW1|YL376_MIMIV Putative DNA-directed RNA polymerase subunit L376	Transcription		Phaeocystis globosa virus	unclassified Prymnesiovirus	Virus						ORF274	ORF274
ORF275	gene_275|GeneMark.hmm|103_aa|+|252663|252974	8e-25	hypothetical protein	Unknown		Phaeocystis globosa virus	unclassified Prymnesiovirus	Virus
ORF276	gene_276|GeneMark.hmm|295_aa|+|252988|253875	1e-28	hypothetical protein	Unknown		Phaeocystis globosa virus	unclassified Prymnesiovirus	Virus
ORF277	gene_277|GeneMark.hmm|1216_aa|+|253952|257602	0	mRNA capping enzyme	Translation		Phaeocystis globosa virus	unclassified Prymnesiovirus	Virus					ORF277	ORF277	ORF277
ORF278	gene_278|GeneMark.hmm|177_aa|-|257637|258170	3e-25	NADAR-domain-containing protein	metabolism	Respiration chain; Coenzyme	Moumouvirus	Moumouvirus	Virus
ORF279	gene_279|GeneMark.hmm|29_aa|-|258239|258328	0 hits	predicted protein	Unknown				ORFan	1	1	10
ORF280	gene_280|GeneMark.hmm|629_aa|+|258322|260211	2e-162	FtsJ-like methyltransferase	Translation		Phaeocystis globosa virus	unclassified Prymnesiovirus	Virus
ORF281	gene_281|GeneMark.hmm|267_aa|-|260215|261018	6e-35	hypothetical protein	Unknown		Phaeocystis globosa virus	unclassified Prymnesiovirus	Virus
ORF282	gene_282|GeneMark.hmm|95_aa|+|261064|261351	2.5	predicted protein	Unknown				ORFan	1	1	37		ORF282		ORF282
ORF283	gene_283|GeneMark.hmm|257_aa|+|261401|262174	7e-64	hypothetical protein	Unknown		Phaeocystis globosa virus	unclassified Prymnesiovirus	Virus				1
ORF284	gene_284|GeneMark.hmm|427_aa|-|262179|263462	6e-35	hypothetical protein	Unknown		Phaeocystis globosa virus	unclassified Prymnesiovirus	Virus
ORF285	gene_285|GeneMark.hmm|1218_aa|+|263569|267225	0	DNA-directed RNA polymerase II subunit RPB2	Transcription		Phaeocystis globosa virus	unclassified Prymnesiovirus	Virus					ORF285	ORF285	ORF285
ORF286	gene_286|GeneMark.hmm|186_aa|+|267268|267828	2e-14	hypothetical protein	Unknown		Chrysochromulina ericina virus	unclassified Phycodnaviridae	Virus
ORF287	gene_287|GeneMark.hmm|167_aa|+|267904|268407	2e-05	hypothetical protein	Unknown		Chrysochromulina ericina virus	unclassified Phycodnaviridae	Virus
ORF288	gene_288|GeneMark.hmm|247_aa|+|268457|269200	4e-35	hypothetical protein	Unknown		Plasmodium chabaudi	protozoan	Eukaryotes
ORF289	gene_289|GeneMark.hmm|120_aa|+|269281|269643	4e-25	hypothetical protein	Unknown		Phaeocystis globosa virus	unclassified Prymnesiovirus	Virus
ORF290	gene_290|GeneMark.hmm|118_aa|+|269698|270054	3.1	predicted protein	Unknown				ORFan
ORF291	gene_291|GeneMark.hmm|87_aa|+|270123|270386	2.7	predicted protein	Unknown				ORFan
ORF292	gene_292|GeneMark.hmm|1060_aa|+|270447|273629	0	MutS7 protein; DNA mismatch repair protein MutS	DNA repair and recombination		Phaeocystis globosa virus	unclassified Prymnesiovirus	Virus						ORF292	ORF292
ORF293	gene_293|GeneMark.hmm|645_aa|+|273701|275638	1e-135	Acyl-CoA dehydrogenase	metabolism	Respiration chain	Guillardia theta	algae	Eukaryotes
ORF294	gene_294|GeneMark.hmm|51_aa|+|275716|275871	0 hits	predicted protein	Unknown				ORFan	1	1	49
ORF295	gene_295|GeneMark.hmm|77_aa|+|275923|276156	2	predicted protein	Unknown				ORFan
ORF296	gene_296|GeneMark.hmm|186_aa|+|276197|276757	5e-119	VOG25351; REFSEQ hemagglutinin domain-containing protein	Vesicle trafficking		Phaeocystis globosa virus	unclassified Prymnesiovirus	Virus
ORF297	gene_297|GeneMark.hmm|110_aa|-|276801|277133	7e-21	VOG01557; sp|P03034|RPC1_LAMBD Repressor protein cI	Transcription		Chrysochromulina ericina virus	unclassified Phycodnaviridae	Virus
ORF298	gene_298|GeneMark.hmm|249_aa|-|277188|277937	0.27	hypothetical protein with zinc finger domain	Posttranslational modification	Ubiquitination, E3			ORFan
ORF299	gene_299|GeneMark.hmm|164_aa|-|277980|278474	1.2	predicted protein	Unknown				ORFan
ORF300	gene_300|GeneMark.hmm|107_aa|-|278510|278833	0.96	predicted protein	Unknown				ORFan
ORF301	gene_301|GeneMark.hmm|60_aa|+|278969|279151	0.99	predicted protein	Unknown				ORFan
ORF302	gene_302|GeneMark.hmm|211_aa|+|279198|279833	3e-86	hypothetical protein	Unknown		Phaeocystis globosa virus	unclassified Prymnesiovirus	Virus
ORF303	gene_303|GeneMark.hmm|65_aa|+|279930|280127	5e-35	ubiquitin-small subunit ribosomal protein S27Ae	Posttranslational modification	Ubiquitination	Emiliania huxleyi	algae	Eukaryotes
ORF304	gene_304|GeneMark.hmm|206_aa|+|280581|281201	6e-33	VOG00428; REFSEQ HNH endonuclease	Virus morphogenesis		Rufibacter radiotolerans	Rufibacter	Bacteria
ORF305	gene_305|GeneMark.hmm|212_aa|-|281192|281830	7e-38	VOG16497; REFSEQ GIY-YIG endonuclease	DNA repair and recombination		Yellowstone lake phycodnavirus 3	unclassified Prasinovirus	Virus
ORF306	gene_306|GeneMark.hmm|146_aa|-|281901|282341	1.2	predicted protein	Unknown				ORFan
ORF307	gene_307|GeneMark.hmm|286_aa|-|282433|283293	0.17	predicted protein	Unknown				ORFan
ORF308	gene_308|GeneMark.hmm|69_aa|+|283343|283552	0.47	predicted protein	Unknown				ORFan
ORF309	gene_309|GeneMark.hmm|426_aa|+|283624|284904	8e-41	VOG01829; sp|Q8QLK1|CATV_NPVMC Viral cathepsin	Posttranslational modification	Protease, C1	Pacmanvirus A23	unclassified viruses	Virus
ORF310	gene_310|GeneMark.hmm|95_aa|-|284901|285188	1.5	predicted protein	Unknown				ORFan
ORF311	gene_311|GeneMark.hmm|119_aa|+|285271|285630	0.01	predicted protein	Unknown				ORFan				1
ORF312	gene_312|GeneMark.hmm|157_aa|-|285620|286093	7e-12	putative ion channel domain-containing protein	Resistance	Ion channel	Aureococcus anophagefferens virus	unclassified Phycodnaviridae	Virus				2
ORF313	gene_313|GeneMark.hmm|525_aa|-|286181|287758	0	Major capsid protein MCP	Virus morphogenesis		Phaeocystis globosa virus	unclassified Prymnesiovirus	Virus	1	1	12		ORF313		ORF313
ORF314	gene_314|GeneMark.hmm|426_aa|+|287887|289167	6e-157	late transcription factor VLTF3	Transcription		Phaeocystis globosa virus	unclassified Prymnesiovirus	Virus					ORF314	ORF314	ORF314
ORF315	gene_315|GeneMark.hmm|58_aa|-|289204|289380	8.8	predicted protein	Unknown				ORFan
ORF316	gene_316|GeneMark.hmm|135_aa|+|289456|289863	3e-65	dCMP deaminase	Metabolism	Nucleotides	Phaeocystis globosa virus	unclassified Prymnesiovirus	Virus
ORF317	gene_317|GeneMark.hmm|249_aa|-|289869|290618	4e-42	Origin recognition complex (ORC) subunit 3 N-terminus	Replication		Phaeocystis globosa virus	unclassified Prymnesiovirus	Virus				2
ORF318	gene_318|GeneMark.hmm|92_aa|-|290664|290942	2e-43	hypothetical protein	Unknown		Phaeocystis globosa virus	unclassified Prymnesiovirus	Virus
ORF319	gene_319|GeneMark.hmm|168_aa|-|290982|291488	0.049	predicted protein	Unknown				ORFan	1	1	29
ORF320	gene_320|GeneMark.hmm|92_aa|-|291511|291789	4e-28	hypothetical protein	Unknown		Phaeocystis globosa virus	unclassified Prymnesiovirus	Virus	1	1	39
ORF321	gene_321|GeneMark.hmm|268_aa|-|291792|292598	3e-70	hypothetical protein	Unknown		Phaeocystis globosa virus	unclassified Prymnesiovirus	Virus
ORF322	gene_322|GeneMark.hmm|142_aa|-|292616|293044	1e-45	hypothetical protein	Unknown		Phaeocystis globosa virus	unclassified Prymnesiovirus	Virus				1
ORF323	gene_323|GeneMark.hmm|352_aa|+|293128|294186	1e-68	hypothetical protein	Unknown		Phaeocystis globosa virus	unclassified Prymnesiovirus	Virus				4
ORF324	gene_324|GeneMark.hmm|81_aa|-|294189|294434	1e-27	hypothetical protein	Unknown		Phaeocystis globosa virus	unclassified Prymnesiovirus	Virus				2
ORF325	gene_325|GeneMark.hmm|208_aa|-|294508|295134	0.37	predicted protein	Unknown				ORFan
ORF326	gene_326|GeneMark.hmm|134_aa|+|295194|295598	0.37	predicted protein	Unknown				ORFan
ORF327	gene_327|GeneMark.hmm|302_aa|+|295765|296673	2e-32	gamma-glutamyl hydrolase	Metabolism	Amino acids	Phaeocystis globosa virus	unclassified Prymnesiovirus	Virus
ORF328	gene_328|GeneMark.hmm|173_aa|+|296696|297217	5e-72	hypothetical protein	Unknown		Phaeocystis globosa virus	unclassified Prymnesiovirus	Virus
ORF329	gene_329|GeneMark.hmm|94_aa|-|297228|297512	8	predicted protein	Unknown				ORFan
ORF330	gene_330|GeneMark.hmm|861_aa|-|297609|300194	0	putative ribonucleoside di phosphate reductase alpha subunit	Metabolism	Nucleotides	Phaeocystis globosa virus	unclassified Prymnesiovirus	Virus					ORF330	ORF330	ORF330
ORF331	gene_331|GeneMark.hmm|441_aa|-|300303|301628	4e-170	Lambda-type exonuclease	DNA repair and recombination		Phaeocystis globosa virus	unclassified Prymnesiovirus	Virus					ORF331	ORF331	ORF331
ORF332	gene_332|GeneMark.hmm|167_aa|+|301739|302242	1e-10	hypothetical protein	Unknown		Papilio machaon	common yellow swallowtail	Eukaryotes				1
ORF333	gene_333|GeneMark.hmm|177_aa|-|302245|302778	6e-49	hypothetical protein	Unknown		Phaeocystis globosa virus	unclassified Prymnesiovirus	Virus
ORF334	gene_334|GeneMark.hmm|173_aa|+|302861|303382	2e-57	hypothetical protein	Unknown		Phaeocystis globosa virus	unclassified Prymnesiovirus	Virus
ORF335	gene_335|GeneMark.hmm|94_aa|-|303408|303692	1.1	predicted protein	Unknown				ORFan
ORF336	gene_336|GeneMark.hmm|326_aa|-|303738|304718	2e-32	Toll-like recepter	Resistance	Inhibition of apoptosis	Chrysochromulina ericina virus	unclassified Phycodnaviridae	Virus
ORF337	gene_337|GeneMark.hmm|238_aa|-|304861|305577	8e-05	hypothetical protein	Unknown		Sarcophilus harrisii	Tasmanian devil	Eukaryotes
ORF338	gene_338|GeneMark.hmm|149_aa|-|305622|306071	6e-28	Glucosamine 6-phosphate N-acetyltransferase	metabolism	Glycan modification; UDP-GlcNAc biosynthesis	Chrysochromulina ericina virus	unclassified Phycodnaviridae	Virus
ORF339	gene_339|GeneMark.hmm|221_aa|+|306143|306808	3e-80	hypothetical protein	Unknown		Phaeocystis globosa virus	unclassified Prymnesiovirus	Virus					ORF339		ORF339
ORF340	gene_340|GeneMark.hmm|647_aa|+|306857|308800	4e-48	aminotransferase	Metabolism	Amino acids	Gramella forsetii	Gramella	Bacteria
ORF341	gene_341|GeneMark.hmm|134_aa|+|308849|309253	5e-48	hypothetical protein	Unknown		Phaeocystis globosa virus	unclassified Prymnesiovirus	Virus
ORF342	gene_342|GeneMark.hmm|251_aa|+|309263|310018	8e-71	N-acetylglucosamine-1-phosphate uridyltransferase	Metabolism	Glycan modification; UDP-GlcNAc biosynthesis	Chrysochromulina ericina virus	unclassified Phycodnaviridae	Virus
ORF343	gene_343|GeneMark.hmm|185_aa|-|310061|310618	9e-20	hypothetical protein	Unknown		Phaeocystis globosa virus	unclassified Prymnesiovirus	Virus
ORF344	gene_344|GeneMark.hmm|111_aa|+|310760|311095	0.0004	hypothetical protein	Unknown		Phaeocystis globosa virus	unclassified Prymnesiovirus	Virus				1
ORF345	gene_345|GeneMark.hmm|339_aa|+|311342|312361	6e-84	hypothetical protein	Unknown		Phaeocystis globosa virus	unclassified Prymnesiovirus	Virus
ORF346	gene_346|GeneMark.hmm|55_aa|+|312366|312533	0 hits	predicted protein	Unknown				ORFan
ORF347	gene_347|GeneMark.hmm|41_aa|+|312603|312728	0 hits	predicted protein	Unknown				ORFan
ORF348	gene_348|GeneMark.hmm|538_aa|-|312725|314341	2e-168	VV A18-like intein-containing helicase; VOG00039; sp|P20703|UVSW_BPT4 ATP-dependent DNA helicase uvsW	Transcription		Chrysochromulina ericina virus	unclassified Phycodnaviridae	Virus					ORF348	ORF348	ORF348
ORF349	gene_349|GeneMark.hmm|147_aa|+|314454|314897	6e-35	hypothetical protein	Unknown		Phaeocystis globosa virus	unclassified Prymnesiovirus	Virus				3
ORF350	gene_350|GeneMark.hmm|101_aa|-|314953|315258	7e-22	predicted protein	Unknown		Phaeocystis globosa virus	unclassified Prymnesiovirus	Virus
ORF351	gene_351|GeneMark.hmm|255_aa|+|315349|316116	0.038	predicted protein	Unknown				ORFan
ORF352	gene_352|GeneMark.hmm|119_aa|-|316238|316597	3e-35	O-antigen ligase like membrane protein	Metabolism	Glycan modification; Glycan modification	Phaeocystis globosa virus	unclassified Prymnesiovirus	Virus
ORF353	gene_353|GeneMark.hmm|45_aa|-|316633|316770	3.6	predicted protein	Unknown				ORFan
ORF354	gene_354|GeneMark.hmm|298_aa|+|317222|318118	4e-82	hypothetical protein	Unknown		Chrysochromulina ericina virus	unclassified Phycodnaviridae	Virus
ORF355	gene_355|GeneMark.hmm|234_aa|-|318123|318827	3e-20	hypothetical protein	Unknown		Phaeocystis globosa virus	unclassified Prymnesiovirus	Virus
ORF356	gene_356|GeneMark.hmm|190_aa|-|318877|319449	7e-91	hypothetical protein	Unknown		Phaeocystis globosa virus	unclassified Prymnesiovirus	Virus
ORF357	gene_357|GeneMark.hmm|282_aa|-|319519|320367	8e-83	hypothetical protein	Unknown		Phaeocystis globosa virus	unclassified Prymnesiovirus	Virus				2	ORF357	ORF357	ORF357
ORF358	gene_358|GeneMark.hmm|302_aa|-|320436|321344	3e-144	Phytanoyl-CoA dioxygenase	Metabolism	Light harvesting; Chlorophyll degradation	Phaeocystis globosa virus	unclassified Prymnesiovirus	Virus
ORF359	gene_359|GeneMark.hmm|487_aa|-|321436|322899	3e-135	hypothetical protein	Unknown		Phaeocystis globosa virus	unclassified Prymnesiovirus	Virus
ORF360	gene_360|GeneMark.hmm|213_aa|-|322965|323606	5e-56	hypothetical protein	Unknown		Phaeocystis globosa virus	unclassified Prymnesiovirus	Virus
ORF361	gene_361|GeneMark.hmm|371_aa|+|323740|324855	3e-137	DNA-directed RNA polymerase II subunit D	Transcription		Phaeocystis globosa virus	unclassified Prymnesiovirus	Virus						ORF361	ORF361
ORF362	gene_362|GeneMark.hmm|653_aa|-|324938|326899	8e-174	ATP-dependent zinc metalloprotease	Posttranslational modification	Protease	Phaeocystis globosa virus	unclassified Prymnesiovirus	Virus	1	1	16	1
ORF363	gene_363|GeneMark.hmm|91_aa|-|327283|327558	9e-16	hypothetical protein	Unknown		Chrysochromulina ericina virus	unclassified Phycodnaviridae	Virus
ORF364	gene_364|GeneMark.hmm|143_aa|-|327606|328037	1e-11	hypothetical protein	Unknown		Chrysochromulina ericina virus	unclassified Phycodnaviridae	Virus
ORF365	gene_365|GeneMark.hmm|276_aa|-|328100|328930	3e-15	putative prenyltransferase protein	Posttranslational modification	Prenylation	Chrysochromulina ericina virus	unclassified Phycodnaviridae	Virus				8
ORF366	gene_366|GeneMark.hmm|273_aa|-|329024|329845	0.5	putative Chlorophyllase	Metabolism	Light harvesting; Chlorophyll degradation			ORFan	1	1	20
ORF367	gene_367|GeneMark.hmm|144_aa|+|329941|330375	2.6	predicted protein	Unknown				ORFan	1	1	17
ORF368	gene_368|GeneMark.hmm|260_aa|+|330516|331298	0.32	predicted protein	Unknown				ORFan	1	1	19
ORF369	gene_369|GeneMark.hmm|226_aa|-|331287|331967	1e-18	hypothetical protein	Unknown		Chrysochromulina ericina virus	unclassified Phycodnaviridae	Virus	1	1	13
ORF370	gene_370|GeneMark.hmm|451_aa|-|332009|333364	7e-152	hypothetical protein	Unknown		Phaeocystis globosa virus	unclassified Prymnesiovirus	Virus
ORF371	gene_371|GeneMark.hmm|1920_aa|+|333480|339242	0	hypothetical protein	Unknown		Phaeocystis globosa virus	unclassified Prymnesiovirus	Virus
ORF372	gene_372|GeneMark.hmm|188_aa|+|339315|339881	1.6	predicted protein	Unknown				ORFan
ORF373	gene_373|GeneMark.hmm|254_aa|-|339883|340647	5e-86	Ribonuclease T; DNA polymerase III subunit epsilon	Translation		Phaeocystis globosa virus	unclassified Prymnesiovirus	Virus
ORF374	gene_374|GeneMark.hmm|266_aa|+|340834|341634	2e-28	hypothetical protein	Unknown		Phaeocystis globosa virus	unclassified Prymnesiovirus	Virus
ORF375	gene_375|GeneMark.hmm|235_aa|-|341639|342346	9e-115	Ribonuclease HII	DNA repair and recombination		Phaeocystis globosa virus	unclassified Prymnesiovirus	Virus
ORF376	gene_376|GeneMark.hmm|459_aa|+|342396|343775	0 hits	predicted protein	Unknown				ORFan	1	1	33
ORF377	gene_377|GeneMark.hmm|45_aa|-|343948|344085	0 hits	predicted protein	Unknown				ORFan
ORF378	gene_378|GeneMark.hmm|195_aa|-|344145|344732	8e-74	ERV/ALR sulfhydryl oxidase	Metabolism	Respiration chain; Cellular redox balance	Phaeocystis globosa virus	unclassified Prymnesiovirus	Virus					ORF378		ORF378
ORF379	gene_379|GeneMark.hmm|158_aa|+|344839|345315	1e-39	disulfide isomerase (thioredoxin domain-containing)	Metabolism	Respiration chain; Cellular redox balance	Phaeocystis globosa virus	unclassified Prymnesiovirus	Virus				1		ORF379	ORF379
ORF380	gene_380|GeneMark.hmm|433_aa|-|345352|346653	3e-112	patatin-like phospholipase	Vesicle trafficking		Phaeocystis globosa virus	unclassified Prymnesiovirus	Virus				1
ORF381	gene_381|GeneMark.hmm|204_aa|+|346695|347309	2e-84	hypothetical protein	Unknown		Phaeocystis globosa virus	unclassified Prymnesiovirus	Virus
ORF382	gene_382|GeneMark.hmm|699_aa|-|347311|349410	6e-84	hypothetical protein	Unknown		Phaeocystis globosa virus	unclassified Prymnesiovirus	Virus
ORF383	gene_383|GeneMark.hmm|376_aa|+|349521|350651	0	transcription initiation factor IIB	Transcription		Phaeocystis globosa virus	unclassified Prymnesiovirus	Virus					ORF383	ORF383	ORF383
ORF384	gene_384|GeneMark.hmm|260_aa|+|350772|351554	9e-91	glycosyltransferase, family 7 (beta-1,4-galactosyltransferase)	Metabolism	Glycan modification	Phaeocystis globosa virus	unclassified Prymnesiovirus	Virus
ORF385	gene_385|GeneMark.hmm|625_aa|-|351555|353432	0	Glutamine-fructose-6-phosphate transaminase	Metabolism	Glycan modification; UDP-GlcNAc biosynthesis	Phaeocystis globosa virus	unclassified Prymnesiovirus	Virus
ORF386	gene_386|GeneMark.hmm|60_aa|+|353514|353696	2.9	predicted protein	Unknown				ORFan
ORF387	gene_387|GeneMark.hmm|93_aa|+|353669|353950	6e-05	protein kinase	Posttranslational modification	Phosphorylation	Pandoraea pnomenusa 3kgm	Pandoraea	Bacteria
ORF388	gene_388|GeneMark.hmm|82_aa|-|353980|354228	8.2	predicted protein	Unknown				ORFan	1	1	14
ORF389	gene_389|GeneMark.hmm|146_aa|-|354298|354738	4e-38	Quaternary ammonium transporter	Metabolism	Amino acids	Chrysochromulina ericina virus	unclassified Phycodnaviridae	Virus				4
ORF390	gene_390|GeneMark.hmm|325_aa|-|354763|355740	0	ribonucleoside-diphosphate reductase small subunit	Metabolism	Nucleotides	Phaeocystis globosa virus	unclassified Prymnesiovirus	Virus					ORF390	ORF390	ORF390
ORF391	gene_391|GeneMark.hmm|156_aa|+|355856|356326	1e-12	hypothetical protein	Unknown		Phaeocystis globosa virus	unclassified Prymnesiovirus	Virus				3
ORF392	gene_392|GeneMark.hmm|143_aa|+|356402|356833	1e-07	Dpy-19-like protein	Recognition		Phaeocystis globosa virus	unclassified Prymnesiovirus	Virus				3
ORF393	gene_393|GeneMark.hmm|121_aa|+|356894|357259	2e-12	predicted protein	Unknown		Phaeocystis globosa virus	unclassified Prymnesiovirus	Virus
ORF394	gene_394|GeneMark.hmm|252_aa|+|357313|358071	9e-51	hypothetical protein	Unknown		Phaeocystis globosa virus	unclassified Prymnesiovirus	Virus				3
ORF395	gene_395|GeneMark.hmm|164_aa|+|358096|358590	5	predicted protein	Unknown				ORFan				2	ORF395		ORF395
ORF396	gene_396|GeneMark.hmm|216_aa|+|358675|359325	2e-76	hypothetical protein	Unknown		Phaeocystis globosa virus	unclassified Prymnesiovirus	Virus	1	1	36
ORF397	gene_397|GeneMark.hmm|68_aa|+|359288|359494	2	predicted protein	Unknown				ORFan
ORF398	gene_398|GeneMark.hmm|111_aa|+|359562|359897	6e-19	Tail fiber protein with peptidase domain	Posttranslational modification	Protease, S74	Phaeocystis globosa virus	unclassified Prymnesiovirus	Virus
ORF399	gene_399|GeneMark.hmm|166_aa|+|360140|360640	2e-64	hypothetical protein	Unknown		Phaeocystis globosa virus	unclassified Prymnesiovirus	Virus
ORF400	gene_400|GeneMark.hmm|41_aa|+|360716|360841	0 hits	predicted protein	Unknown				ORFan	1	1	33
ORF401	gene_401|GeneMark.hmm|608_aa|+|360896|362722	0	hypothetical protein	Unknown		Phaeocystis globosa virus	unclassified Prymnesiovirus	Virus
ORF402	gene_402|GeneMark.hmm|138_aa|+|362799|363215	9e-32	Staphylococcal nuclease homologue protein	Replication		Heterosigma akashiwo virus 01	Raphidovirus	Virus
ORF403	gene_403|GeneMark.hmm|163_aa|-|363232|363723	3e-07	hypothetical protein	Unknown		Chrysochromulina ericina virus	unclassified Phycodnaviridae	Virus				2
ORF404	gene_404|GeneMark.hmm|166_aa|+|363766|364266	3e-72	hypothetical protein	Unknown		Phaeocystis globosa virus	unclassified Prymnesiovirus	Virus					ORF404	ORF404	ORF404
ORF405	gene_405|GeneMark.hmm|82_aa|-|364268|364516	0.0002	hypothetical protein	Unknown		Chrysochromulina ericina virus	unclassified Phycodnaviridae	Virus
ORF406	gene_406|GeneMark.hmm|331_aa|-|364596|365591	5e-06	hypothetical protein	Unknown		Amphiprion ocellaris	clown anemonefish	Eukaryotes
ORF407	gene_407|GeneMark.hmm|373_aa|-|365672|366793	2e-74	hypothetical protein	Unknown		Phaeocystis globosa virus	unclassified Prymnesiovirus	Virus
ORF408	gene_408|GeneMark.hmm|307_aa|+|366870|367793	5e-118	replication factor C small subunit	Replication		Phaeocystis globosa virus	unclassified Prymnesiovirus	Virus
ORF409	gene_409|GeneMark.hmm|86_aa|-|367782|368042	2.5	predicted protein	Unknown				ORFan
ORF410	gene_410|GeneMark.hmm|372_aa|+|368137|369255	6e-108	TATA-box binding protein	Transcription		Phaeocystis globosa virus	unclassified Prymnesiovirus	Virus					ORF410		ORF410
ORF411	gene_411|GeneMark.hmm|335_aa|-|369244|370251	1e-06	hypothetical protein	Unknown		Chrysochromulina ericina virus	unclassified Phycodnaviridae	Virus
ORF412	gene_412|GeneMark.hmm|42_aa|+|370205|370333	0 hits	predicted protein	Unknown				ORFan	1	1	14
ORF413	gene_413|GeneMark.hmm|204_aa|-|370338|370952	3e-08	Outer membrane autotransporter	Recognition		Phaeocystis globosa virus	unclassified Prymnesiovirus	Virus
ORF414	gene_414|GeneMark.hmm|102_aa|+|371054|371362	1e-36	DVNP domain-containing protein	Chromatin remodelling		Phaeocystis globosa virus	unclassified Prymnesiovirus	Virus
ORF415	gene_415|GeneMark.hmm|185_aa|+|371665|372222	9e-08	hypothetical protein	Unknown		Chrysochromulina ericina virus	unclassified Phycodnaviridae	Virus
ORF416	gene_416|GeneMark.hmm|262_aa|+|372285|373073	5e-104	Exodeoxyribonuclease III	DNA repair and recombination		Phaeocystis globosa virus	unclassified Prymnesiovirus	Virus
ORF417	gene_417|GeneMark.hmm|38_aa|+|373102|373218	0 hits	predicted protein	Unknown				ORFan
ORF418	gene_418|GeneMark.hmm|70_aa|-|373237|373449	5e-05	hypothetical protein	Unknown		Phaeocystis globosa virus	unclassified Prymnesiovirus	Virus
ORF419	gene_419|GeneMark.hmm|211_aa|-|373504|374139	2e-15	Endonuclease I	Metabolism	Nucleotides; nucleic acid degradation	Lysinibacillus sp. SGAir0095	unclassified Lysinibacillus	Bacteria
ORF420	gene_420|GeneMark.hmm|279_aa|+|374229|375068	1e-163	putative proliferating cell nuclear antigen	Replication		Phaeocystis globosa virus	unclassified Prymnesiovirus	Virus					ORF420	ORF420	ORF420
ORF421	gene_421|GeneMark.hmm|141_aa|-|375191|375616	1e-25	hypothetical protein	Unknown		Phaeocystis globosa virus	unclassified Prymnesiovirus	Virus
ORF422	gene_422|GeneMark.hmm|159_aa|+|375764|376243	2e-20	E3 ubiquitin protein ligase	Posttranslational modification	Ubiquitination, E3	Phaeocystis globosa virus	unclassified Prymnesiovirus	Virus
ORF423	gene_423|GeneMark.hmm|94_aa|+|376286|376570	4e-29	VOG01829; sp|Q8QLK1|CATV_NPVMC Viral cathepsin	Posttranslational modification	Protease, C1	Aureococcus anophagefferens	algae	Eukaryotes
ORF424	gene_424|GeneMark.hmm|242_aa|-|376560|377288	6e-55	hypothetical protein	Unknown		Phaeocystis globosa virus	unclassified Prymnesiovirus	Virus				5
ORF425	gene_425|GeneMark.hmm|187_aa|-|377311|377874	4e-63	Eukaryotic initiation factor 4E family protein	Translation		Phaeocystis globosa virus	unclassified Prymnesiovirus	Virus
ORF426	gene_426|GeneMark.hmm|186_aa|-|377924|378484	5e-36	hypothetical protein	Unknown		Phaeocystis globosa virus	unclassified Prymnesiovirus	Virus				3
ORF427	gene_427|GeneMark.hmm|517_aa|-|378538|380091	2e-174	Glycotransferase, family 2	Metabolism	Glycan modification	Phaeocystis globosa virus	unclassified Prymnesiovirus	Virus
ORF428	gene_428|GeneMark.hmm|490_aa|-|380161|381633	3e-72	hypothetical protein	Unknown		Phaeocystis globosa virus	unclassified Prymnesiovirus	Virus				6
ORF429	gene_429|GeneMark.hmm|351_aa|+|381697|382752	3e-165	GMP reductase	Metabolism	Nucleotides	Phaeocystis globosa virus	unclassified Prymnesiovirus	Virus
ORF430	gene_430|GeneMark.hmm|1119_aa|+|382796|386155	4e-151	VOG03348; REFSEQ FG-GAP repeat protein	Recognition		Synechococcus sp. WH 8109	Synechococcus	Bacteria
ORF431	gene_431|GeneMark.hmm|1224_aa|+|386490|390164	3e-10	predicted protein	Unknown		Synechococcus sp. KORDI-49	Synechococcus	Bacteria
ORF432	gene_432|GeneMark.hmm|308_aa|+|390168|391094	6e-25	VOG03348; REFSEQ FG-GAP repeat protein	Recognition		Marivirga tractuosa DSM 4126	Marivirga	Bacteria
ORF433	gene_433|GeneMark.hmm|344_aa|+|391272|392306	3e-43	hypothetical protein	Unknown		Phaeocystis globosa virus	unclassified Prymnesiovirus	Virus				1
ORF434	gene_434|GeneMark.hmm|1339_aa|-|392356|396375	8e-07	pentapeptide repeat-containing protein	Chromatin remodelling		Flavobacterium magnum	Flavobacterium	Bacteria
ORF435	gene_435|GeneMark.hmm|1472_aa|-|396427|400845	6e-09	pentapeptide repeat-containing protein	Chromatin remodelling		Antarcticibacterium arcticum	Antarcticibacterium	Bacteria
ORF436	gene_436|GeneMark.hmm|507_aa|+|400902|402425	9e-90	hypothetical protein	Unknown		Phaeocystis globosa virus	unclassified Prymnesiovirus	Virus
ORF437	gene_437|GeneMark.hmm|343_aa|-|402459|403490	1e-98	UV damage endonuclease UvdE	DNA repair and recombination		Orpheovirus IHUMI-LCC2	unclassified Phycodnaviridae	Virus
ORF438	gene_438|GeneMark.hmm|36_aa|+|403508|403618	0 hits	predicted protein	Unknown				ORFan	1	1	17
ORF439	gene_439|GeneMark.hmm|284_aa|+|403612|404466	5e-134	putative rhodanese	Metabolism	Respiration chain; Cellular redox balance	Phaeocystis globosa virus	unclassified Prymnesiovirus	Virus
ORF440	gene_440|GeneMark.hmm|440_aa|+|404508|405830	2e-167	Amino-oxidase family protein	Metabolism	Amino acids	Phaeocystis globosa virus	unclassified Prymnesiovirus	Virus
ORF441	gene_441|GeneMark.hmm|101_aa|-|405832|406137	3e-47	hypothetical protein	Unknown		Phaeocystis globosa virus	unclassified Prymnesiovirus	Virus
ORF442	gene_442|GeneMark.hmm|190_aa|+|406179|406751	2e-59	phosphoesterase PA-phosphatase related protein	Posttranslational modification	Phosphorylation	Phaeocystis globosa virus	unclassified Prymnesiovirus	Virus	1	1	25
ORF443	gene_443|GeneMark.hmm|121_aa|+|406831|407196	5.6	predicted protein	Unknown				ORFan				4
ORF444	gene_444|GeneMark.hmm|162_aa|+|407239|407727	4e-47	hypothetical protein	Unknown		Phaeocystis globosa virus	unclassified Prymnesiovirus	Virus
ORF445	gene_445|GeneMark.hmm|72_aa|-|407730|407948	6.1	predicted protein	Unknown				ORFan				2
ORF446	gene_446|GeneMark.hmm|184_aa|+|408062|408616	1e-55	Putative chlorophyll A-B binding protein	Metabolism	Light harvesting	Chrysochromulina ericina virus	unclassified Phycodnaviridae	Virus	1	1	24	1
ORF447	gene_447|GeneMark.hmm|72_aa|+|408693|408911	5.6	predicted protein	Unknown				ORFan
ORF448	gene_448|GeneMark.hmm|212_aa|-|408906|409544	1e-54	NAD-binding domain-containing protein	Metabolism	Respiration chain; Coenzyme	Chrysochromulina ericina virus	unclassified Phycodnaviridae	Virus	1	1	17
ORF449	gene_449|GeneMark.hmm|121_aa|-|409588|409953	3e-20	hypothetical protein	Unknown		Phaeocystis globosa virus	unclassified Prymnesiovirus	Virus
ORF450	gene_450|GeneMark.hmm|563_aa|-|410030|411721	0	Major capsid protein MCP2	Virus morphogenesis		Phaeocystis globosa virus	unclassified Prymnesiovirus	Virus					ORF450	ORF450	ORF450
ORF451	gene_451|GeneMark.hmm|399_aa|+|411814|413013	4e-141	Phosphatidylinositol-specific phospholipase C, Y domain	Resistance		Phaeocystis globosa virus	unclassified Prymnesiovirus	Virus				1
ORF452	gene_452|GeneMark.hmm|455_aa|+|413077|414444	0	polyA polymerase catalytic subunit	Transcription		Phaeocystis globosa virus	unclassified Prymnesiovirus	Virus
ORF453	gene_453|GeneMark.hmm|86_aa|-|414513|414773	2e-42	hypothetical protein	Unknown		Phaeocystis globosa virus	unclassified Prymnesiovirus	Virus	1	1	15	2
ORF454	gene_454|GeneMark.hmm|323_aa|+|414865|415836	5e-148	hypothetical protein	Unknown		Phaeocystis globosa virus	unclassified Prymnesiovirus	Virus						ORF454	ORF454
ORF455	gene_455|GeneMark.hmm|364_aa|+|415900|416994	0.002	predicted protein	Unknown				ORFan
ORF456	gene_456|GeneMark.hmm|310_aa|+|417040|417972	3.7	predicted protein	Unknown				ORFan
ORF457	gene_457|GeneMark.hmm|47_aa|+|418012|418155	0 hits	predicted protein	Unknown				ORFan
ORF458	gene_458|GeneMark.hmm|66_aa|+|418220|418420	8e-14	AN1-type zinc finger protein	Posttranslational modification	Ubiquitination, E3	Phaeocystis globosa virus	unclassified Prymnesiovirus	Virus
ORF459	gene_459|GeneMark.hmm|138_aa|+|418399|418815	1.2	predicted protein	Unknown				ORFan				4
ORF460	gene_460|GeneMark.hmm|278_aa|-|418823|419659	0	VV A32-like packaging ATPase	Virus morphogenesis		Chrysochromulina ericina virus	unclassified Phycodnaviridae	Virus					ORF460	ORF460	ORF460
ORF461	gene_461|GeneMark.hmm|576_aa|+|419771|421501	0	AF-4 domain-containing protein	Unknown		Phaeocystis globosa virus	unclassified Prymnesiovirus	Virus
ORF462	gene_462|GeneMark.hmm|79_aa|-|421570|421809	9e-24	hypothetical protein	Unknown		Phaeocystis globosa virus	unclassified Prymnesiovirus	Virus				2
ORF463	gene_463|GeneMark.hmm|337_aa|-|421859|422872	4e-120	hypothetical protein	Unknown		Phaeocystis globosa virus	unclassified Prymnesiovirus	Virus					ORF463		ORF463
ORF464	gene_464|GeneMark.hmm|277_aa|-|422876|423709	7e-103	VOG00946; sp|P35250|RFC2_HUMAN Replication factor C subunit 2	Replication		Phaeocystis globosa virus	unclassified Prymnesiovirus	Virus
ORF465	gene_465|GeneMark.hmm|44_aa|+|423873|424007	6.2	predicted protein	Unknown				ORFan
ORF466	gene_466|GeneMark.hmm|523_aa|+|424144|425715	2e-46	hypothetical protein	Unknown		Phaeocystis globosa virus	unclassified Prymnesiovirus	Virus
ORF467	gene_467|GeneMark.hmm|3037_aa|-|425803|434916	2e-76	hypothetical protein	Unknown		Phaeocystis globosa virus	unclassified Prymnesiovirus	Virus
ORF468	gene_468|GeneMark.hmm|400_aa|-|435052|436254	3e-22	hypothetical protein	Unknown		Phaeocystis globosa virus	unclassified Prymnesiovirus	Virus
ORF469	gene_469|GeneMark.hmm|1585_aa|+|436379|441136	0	DNA gyrase/DNA topoisomerase IV subunit A	Replication		Phaeocystis globosa virus	unclassified Prymnesiovirus	Virus					ORF469	ORF469	ORF469
ORF470	gene_470|GeneMark.hmm|454_aa|-|441174|442538	0	replication factor C large subunit	Replication		Phaeocystis globosa virus	unclassified Prymnesiovirus	Virus
ORF471	gene_471|GeneMark.hmm|166_aa|-|442526|443026	0.29	hypothetical protein	Unknown				ORFan
ORF472	gene_472|GeneMark.hmm|195_aa|-|444110|444697	4e-66	VOG03348; REFSEQ FG-GAP repeat protein	Recognition		Synechococcus sp. WH 8109	Synechococcus	Bacteria
ORF473	gene_473|GeneMark.hmm|1312_aa|-|444806|448744	1e-113	VOG03348; REFSEQ FG-GAP repeat protein	Recognition		Synechococcus sp. WH 8109	Synechococcus	Bacteria
ORF474	gene_474|GeneMark.hmm|119_aa|-|448821|449180	2e-08	hypothetical protein	Unknown		Phaeocystis globosa virus	unclassified Prymnesiovirus	Virus
ORF475	gene_475|GeneMark.hmm|324_aa|-|449230|450204	3e-56	Tail fiber protein	Virus morphogenesis		Phaeocystis globosa virus	unclassified Prymnesiovirus	Virus
ORF476	gene_476|GeneMark.hmm|99_aa|+|450302|450601	8e-36	hypothetical protein	Unknown		Chrysochromulina ericina virus	unclassified Phycodnaviridae	Virus
ORF477	gene_477|GeneMark.hmm|110_aa|-|450603|450935	3e-19	hypothetical protein	Unknown		Chrysochromulina ericina virus	unclassified Phycodnaviridae	Virus
ORF478	gene_478|GeneMark.hmm|321_aa|-|451043|452008	1e-106	replication factor C small subunit	Replication		Phaeocystis globosa virus	unclassified Prymnesiovirus	Virus
ORF479	gene_479|GeneMark.hmm|301_aa|+|452065|452970	9e-64	DnaJ superfamily	Posttranslational modification	chaperone	Phaeocystis globosa virus	unclassified Prymnesiovirus	Virus
ORF480	gene_480|GeneMark.hmm|57_aa|-|453046|453219	0 hits	predicted protein	Unknown				ORFan
ORF481	gene_481|GeneMark.hmm|329_aa|-|453246|454235	3e-149	hypothetical protein	Unknown		Phaeocystis globosa virus	unclassified Prymnesiovirus	Virus	1	1	22
ORF482	gene_482|GeneMark.hmm|294_aa|-|454282|455166	4e-81	hypothetical protein	Unknown		Phaeocystis globosa virus	unclassified Prymnesiovirus	Virus
ORF483	gene_483|GeneMark.hmm|970_aa|+|455265|458177	0.002	predicted protein	Unknown		Guillardia theta		ORFan
ORF484	gene_484|GeneMark.hmm|333_aa|-|458213|459214	6e-74	hypothetical protein	Unknown		Phaeocystis globosa virus	unclassified Prymnesiovirus	Virus
ORF485	gene_485|GeneMark.hmm|67_aa|+|460005|460208	0.0003	predicted protein	Unknown		Brassica napus	rape	Eukaryotes
ORF486	gene_486|GeneMark.hmm|31_aa|+|460234|460329	0 hits	predicted protein	Unknown				ORFan
ORF487	gene_487|GeneMark.hmm|127_aa|+|460816|461199	1e-43	Thioredoxin-containing protein	Metabolism	Respiration chain; Cellular redox balance	Phaeocystis globosa virus	unclassified Prymnesiovirus	Virus
ORF488	gene_488|GeneMark.hmm|550_aa|-|461219|462871	0	XRN family 5'-3' exonuclease	Translation		Phaeocystis globosa virus	unclassified Prymnesiovirus	Virus
ORF489	gene_489|GeneMark.hmm|1079_aa|+|462946|466185	7e-178	Intein containing ATP-dependent Lon peptidase	Posttranslational modification	Protease, S16	Chrysochromulina ericina virus	unclassified Phycodnaviridae	Virus
ORF490	gene_490|GeneMark.hmm|38_aa|-|466467|466583	0 hits	predicted protein	Unknown				ORFan	1	1	14
ORF491	gene_491|GeneMark.hmm|217_aa|+|466553|467206	6e-77	hypothetical protein	Unknown		Phaeocystis globosa virus	unclassified Prymnesiovirus	Virus				5
ORF492	gene_492|GeneMark.hmm|150_aa|-|467210|467662	7e-39	ERV/ALR sulfhydryl oxidase	Metabolism	Respiration chain; Cellular redox balance	Phaeocystis globosa virus	unclassified Prymnesiovirus	Virus					ORF492		ORF492
ORF493	gene_493|GeneMark.hmm|202_aa|+|467771|468379	8e-46	SAP domain-containing protein	Chromatin remodelling		Phaeocystis globosa virus	unclassified Prymnesiovirus	Virus
ORF494	gene_494|GeneMark.hmm|120_aa|+|468451|468813	2e-44	hypothetical protein	Unknown		Phaeocystis globosa virus	unclassified Prymnesiovirus	Virus
ORF495	gene_495|GeneMark.hmm|160_aa|+|468873|469355	0.2	predicted protein	Unknown				ORFan
ORF496	gene_496|GeneMark.hmm|130_aa|+|469386|469778	7e-11	putative lipoprotein outer membrane proteins with heavy-metal binding domain	Recognition		Lactobacillus apis	Lactobacillus	Bacteria
ORF497	gene_497|GeneMark.hmm|61_aa|+|469829|470014	1e-08	hypothetical protein	Unknown		Phaeocystis globosa virus	unclassified Prymnesiovirus	Virus				2
ORF498	gene_498|GeneMark.hmm|398_aa|-|470011|471207	5e-52	hypothetical protein	Unknown		Chrysochromulina ericina virus	unclassified Phycodnaviridae	Virus				2
ORF499	gene_499|GeneMark.hmm|470_aa|-|471243|472655	2e-36	glycosyltransferase, family 2	metabolism	Glycan modification	Sphingomonas sp. LM7	unclassified Sphingomonas	Bacteria
ORF500	gene_500|GeneMark.hmm|323_aa|-|472719|473690	1e-114	Polysaccharide (O-antigen) biosynthesis protein	metabolism	Glycan modification	Megavirus chiliensis	unclassified Mimivirus	Virus
ORF501	gene_501|GeneMark.hmm|692_aa|+|473891|475969	5e-65	methyltransferase	Posttranslational modification	Methylation	Megavirus chiliensis	unclassified Mimivirus	Virus
ORF502	gene_502|GeneMark.hmm|320_aa|-|475964|476926	0 hits	predicted protein	Unknown				ORFan
ORF503	gene_503|GeneMark.hmm|47_aa|-|476889|477032	5.1	predicted protein	Unknown				ORFan
ORF504	gene_504|GeneMark.hmm|608_aa|+|477009|478835	3e-71	formyl transferase	Translation		Salinarchaeum sp. Harcht-Bsk1	halo archaea	Archaea
ORF505	gene_505|GeneMark.hmm|276_aa|-|478882|479712	1e-13	hypothetical protein	Unknown		Megavirus chiliensis	unclassified Mimivirus	Virus
ORF506	gene_506|GeneMark.hmm|284_aa|-|479733|480587	7e-14	hypothetical protein	Unknown		Catenovulum sp. CCB-QB4	marine bacterium	Bacteria
ORF507	gene_507|GeneMark.hmm|233_aa|-|480623|481324	0.069	hypothetical protein	Unknown				ORFan
ORF508	gene_508|GeneMark.hmm|217_aa|-|481388|482041	8e-14	hypothetical protein	Unknown		Breviolum minutum	Dinoflagellates	Eukaryotes
ORF509	gene_509|GeneMark.hmm|135_aa|-|482180|482587	1.3	predicted protein	Unknown				ORFan	1	1	10
ORF510	gene_510|GeneMark.hmm|284_aa|-|482913|483767	1e-21	hypothetical protein	Unknown		Paracoccus contaminans	oxidase-positive bacterial strain	Bacteria
ORF511	gene_511|GeneMark.hmm|282_aa|-|483830|484678	2e-85	glycosyltransferases, family 11	metabolism	Glycan modification	Chrysochromulina ericina virus	unclassified Phycodnaviridae	Virus
ORF512	gene_512|GeneMark.hmm|167_aa|+|484897|485400	1e-48	hypothetical protein	Unknown		Phaeocystis globosa virus	unclassified Prymnesiovirus	Virus
ORF513	gene_513|GeneMark.hmm|186_aa|+|485418|485978	3e-34	hypothetical protein	Unknown		Phaeocystis globosa virus	unclassified Prymnesiovirus	Virus	1	1	12
ORF514	gene_514|GeneMark.hmm|125_aa|-|485975|486352	0 hits	predicted protein	Unknown				ORFan
ORF515	gene_515|GeneMark.hmm|208_aa|+|486447|487073	6e-39	hypothetical protein	Unknown		Phaeocystis globosa virus	unclassified Prymnesiovirus	Virus
ORF516	gene_516|GeneMark.hmm|172_aa|-|487214|487732	0.28	predicted protein	Unknown				ORFan
ORF517	gene_517|GeneMark.hmm|132_aa|-|488182|488580	7.8	predicted protein	Unknown				ORFan
ORF518	gene_518|GeneMark.hmm|128_aa|-|488831|489217	3e-05	class II HMG-box domain containing protein	Chromatin remodelling		Debaryomyces hansenii	yeast	Eukaryotes
ORF519	gene_519|GeneMark.hmm|126_aa|-|489611|489991	0.0004	class II HMG-box domain containing protein	Chromatin remodelling		Chrysochromulina ericina virus	unclassified Phycodnaviridae	Virus
ORF520	gene_520|GeneMark.hmm|62_aa|-|490374|490562	0.081	hypothetical protein	Unknown				ORFan
ORF521	gene_521|GeneMark.hmm|99_aa|+|490671|490970	2.7	predicted protein	Unknown				ORFan
ORF522	gene_522|GeneMark.hmm|106_aa|+|491185|491505	0 hits	predicted protein	Unknown				ORFan
ORF523	gene_523|GeneMark.hmm|44_aa|+|491722|491856	0 hits	predicted protein	Unknown				ORFan
ORF524	gene_524|GeneMark.hmm|255_aa|+|491856|492623	0 hits	predicted protein	Unknown				ORFan
ORF525	gene_525|GeneMark.hmm|50_aa|-|492620|492772	0 hits	predicted protein	Unknown				ORFan
ORF526	gene_526|GeneMark.hmm|36_aa|+|493472|493582	0 hits	predicted protein	Unknown				ORFan
ORF527	gene_527|GeneMark.hmm|104_aa|+|493852|494166	1e-16	hypothetical protein	Unknown		Phaeocystis globosa virus	unclassified Prymnesiovirus	Virus
ORF528	gene_528|GeneMark.hmm|130_aa|-|494171|494563	0.94	predicted protein	Unknown				ORFan
ORF529	gene_529|GeneMark.hmm|161_aa|-|494745|495230	7e-30	hypothetical protein	Unknown		Phaeocystis globosa virus	unclassified Prymnesiovirus	Virus
ORF530	gene_530|GeneMark.hmm|136_aa|-|495541|495951	0.002	protein nanos 1	Translation		Danaus plexippus (monarch butterfly)		ORFan
ORF531	gene_531|GeneMark.hmm|708_aa|-|496055|498181	3e-75	hypothetical protein	Unknown		Phaeocystis globosa virus	unclassified Prymnesiovirus	Virus				3
ORF532	gene_532|GeneMark.hmm|286_aa|-|498233|499093	4e-51	deoxyuridine 5'-triphosphate nucleotidohydrolase	Metabolism	Nucleotides	Phaeocystis globosa virus	unclassified Prymnesiovirus	Virus
ORF533	gene_533|GeneMark.hmm|88_aa|+|499213|499479	7e-36	putative nucleoside deaminase	Metabolism	Nucleotides	Phaeocystis globosa virus	unclassified Prymnesiovirus	Virus
ORF534	gene_534|GeneMark.hmm|181_aa|+|499505|500050	5e-22	hypothetical protein	Unknown		Phaeocystis globosa virus	unclassified Prymnesiovirus	Virus
ORF535	gene_535|GeneMark.hmm|225_aa|-|500037|500714	6e-18	hypothetical protein	Unknown		Phaeocystis globosa virus	unclassified Prymnesiovirus	Virus
ORF536	gene_536|GeneMark.hmm|142_aa|+|500836|501264	0.01	hypothetical protein	Unknown				ORFan
ORF537	gene_537|GeneMark.hmm|167_aa|+|501309|501812	0.04	predicted protein	Unknown				ORFan
ORF538	gene_538|GeneMark.hmm|510_aa|+|501837|503369	3e-06	VOG04103; sp|P08393|ICP0_HHV11 E3 ubiquitin-protein ligase ICP0	Posttranslational modification	Ubiquitination, E3	Helobdella robusta	leech	Eukaryotes
ORF539	gene_539|GeneMark.hmm|503_aa|-|503425|504936	3e-43	protein kinase	Posttranslational modification	Phosphorylation	Phaeocystis globosa virus	unclassified Prymnesiovirus	Virus
ORF540	gene_540|GeneMark.hmm|135_aa|+|505013|505420	4e-28	hypothetical protein	Unknown		Phaeocystis globosa virus	unclassified Prymnesiovirus	Virus
ORF541	gene_541|GeneMark.hmm|57_aa|+|505564|505737	0.002	hypothetical protein	Unknown		Phaeocystis globosa virus	unclassified Prymnesiovirus	ORFan
ORF542	gene_542|GeneMark.hmm|316_aa|-|505734|506684	2e-17	hypothetical protein	Unknown		Phaeocystis globosa virus	unclassified Prymnesiovirus	Virus				1
ORF543	gene_543|GeneMark.hmm|121_aa|-|506915|507280	0.33	predicted protein	Unknown				ORFan	1	1	10
ORF544	gene_544|GeneMark.hmm|299_aa|-|507329|508228	0.54	predicted protein	Unknown				ORFan
ORF545	gene_545|GeneMark.hmm|367_aa|-|508366|509469	1.2	predicted protein	Unknown				ORFan
ORF546	gene_546|GeneMark.hmm|134_aa|+|509544|509948	0.69	predicted protein	Unknown				ORFan
ORF547	gene_547|GeneMark.hmm|112_aa|-|509950|510288	2.9	predicted protein	Unknown				ORFan
ORF548	gene_548|GeneMark.hmm|1116_aa|+|510362|513712	0	NAD-dependent DNA ligase	Replication		Phaeocystis globosa virus	unclassified Prymnesiovirus	Virus
ORF549	gene_549|GeneMark.hmm|213_aa|+|513773|514414	0.0001	hypothetical protein	Unknown		Myotis brandtii	Brandt's bat	Eukaryotes
ORF550	gene_550|GeneMark.hmm|188_aa|-|514417|514983	1e-12	hypothetical protein	Unknown		Chrysochromulina ericina virus	unclassified Phycodnaviridae	Virus	1	1	12	2
ORF551	gene_551|GeneMark.hmm|56_aa|+|515293|515463	0 hits	predicted protein	Unknown				ORFan				1
ORF552	gene_552|GeneMark.hmm|148_aa|-|515397|515843	1.1	predicted protein	Unknown				ORFan
ORF553	gene_553|GeneMark.hmm|58_aa|-|516027|516203	7.6	predicted protein	Unknown				ORFan
ORF554	gene_554|GeneMark.hmm|489_aa|-|516175|517644	9e-160	hypothetical protein	Unknown		Phaeocystis globosa virus	unclassified Prymnesiovirus	Virus
ORF555	gene_555|GeneMark.hmm|166_aa|-|517728|518228	0.78	predicted protein	Unknown				ORFan
ORF556	gene_556|GeneMark.hmm|276_aa|-|518308|519138	2e-54	hypothetical protein	Unknown		Phaeocystis globosa virus	unclassified Prymnesiovirus	Virus
ORF557	gene_557|GeneMark.hmm|210_aa|+|519212|519844	6e-47	hypothetical protein	Unknown		Phaeocystis globosa virus	unclassified Prymnesiovirus	Virus
ORF558	gene_558|GeneMark.hmm|452_aa|-|519846|521204	0.49	predicted protein	Unknown				ORFan
ORF559	gene_559|GeneMark.hmm|114_aa|+|521234|521578	0.31	predicted protein	Unknown				ORFan
ORF560	gene_560|GeneMark.hmm|107_aa|+|521638|521961	0.0002	putative poly [ADP-ribose] polymerase 11	Posttranslational modification	poly(ADP-ribosyl)ation	Oreochromis niloticus	Nile tilapia	Eukaryotes
ORF561	gene_561|GeneMark.hmm|67_aa|+|522053|522256	2.8	predicted protein	Unknown				ORFan
ORF562	gene_562|GeneMark.hmm|120_aa|+|522340|522702	6e-47	DUF1599 domain-containing protein	metabolism	Nucleotides; putative nucleotide modification	Phaeocystis globosa virus	unclassified Prymnesiovirus	Virus
ORF563	gene_563|GeneMark.hmm|84_aa|+|522749|523003	0 hits	predicted protein	Unknown				ORFan
ORF564	gene_564|GeneMark.hmm|129_aa|+|523060|523449	3e-15	S-adenosylmethionine decarboxylase related protein	Metabolism	polyamine biosynthesis	Methanolacinia petrolearia	Methanomicrobiaceae	Archaea
ORF565	gene_565|GeneMark.hmm|631_aa|-|523481|525376	0	ELP3-like acetyltransferase	Posttranslational modification	Acetylation	Phaeocystis globosa virus	unclassified Prymnesiovirus	Virus
ORF566	gene_566|GeneMark.hmm|447_aa|+|525500|526843	2e-125	hypothetical protein	Unknown		Phaeocystis globosa virus	unclassified Prymnesiovirus	Virus
ORF567	gene_567|GeneMark.hmm|211_aa|-|526840|527475	5e-21	putative CLP_protease	Posttranslational modification	Protease, S14	Phaeocystis globosa virus	unclassified Prymnesiovirus	Virus
ORF568	gene_568|GeneMark.hmm|53_aa|+|527594|527755	0 hits	predicted protein	Unknown				ORFan
ORF569	gene_569|GeneMark.hmm|55_aa|-|527867|528034	1.4	predicted protein	Unknown				ORFan
ORF570	gene_570|GeneMark.hmm|187_aa|-|528018|528581	3.1	predicted protein	Unknown				ORFan
ORF571	gene_571|GeneMark.hmm|206_aa|+|528834|529454	7e-27	hypothetical protein	Unknown		Phaeocystis globosa virus	unclassified Prymnesiovirus	Virus
ORF572	gene_572|GeneMark.hmm|169_aa|+|529600|530109	4e-44	putative Nudix hydrolase	Translation		Phaeocystis globosa virus	unclassified Prymnesiovirus	Virus
ORF573	gene_573|GeneMark.hmm|462_aa|+|530174|531562	4e-160	DNA methyltrasferase	Resistance	Restriction-modification system	Phaeocystis globosa virus	unclassified Prymnesiovirus	Virus
ORF574	gene_574|GeneMark.hmm|103_aa|-|531557|531868	0.72	hypothetical protein	Unknown				ORFan
ORF575	gene_575|GeneMark.hmm|111_aa|+|531998|532333	0.0005	DnaJ-like protein	Posttranslational modification	chaperone	Phaeocystis globosa virus	unclassified Prymnesiovirus	Virus
ORF576	gene_576|GeneMark.hmm|505_aa|-|532335|533852	2e-100	2-polyprenylphenol 6-hydroxylase	metabolism	Respiration chain; CoQ (ubiquinone) biosynthesis in mitochondria	Phaeocystis globosa virus	unclassified Prymnesiovirus	Virus
ORF577	gene_577|GeneMark.hmm|193_aa|+|533934|534515	2e-50	hypothetical protein	Unknown		Phaeocystis globosa virus	unclassified Prymnesiovirus	Virus
ORF578	gene_578|GeneMark.hmm|165_aa|+|534560|535057	2e-40	hypothetical protein	Unknown		Phaeocystis globosa virus	unclassified Prymnesiovirus	Virus
ORF579	gene_579|GeneMark.hmm|515_aa|+|535145|536692	2e-87	hypothetical protein	Unknown		Phaeocystis globosa virus	unclassified Prymnesiovirus	Virus
ORF580	gene_580|GeneMark.hmm|240_aa|-|536695|537417	4e-91	hypothetical protein	Unknown		Chrysochromulina ericina virus	unclassified Phycodnaviridae	Virus				2
ORF581	gene_581|GeneMark.hmm|300_aa|-|537497|538399	0 hits	predicted protein	Unknown				ORFan
ORF582	gene_582|GeneMark.hmm|69_aa|-|538440|538649	0.69	predicted protein	Unknown				ORFan
ORF583	gene_583|GeneMark.hmm|69_aa|-|538697|538906	0.58	EzrA domian containing protein	Resistance	Cell cycle regulation			ORFan
ORF584	gene_584|GeneMark.hmm|204_aa|-|538957|539571	0 hits	predicted protein	Unknown				ORFan
ORF585	gene_585|GeneMark.hmm|171_aa|-|539922|540437	7	predicted protein	Unknown				ORFan
ORF586	gene_586|GeneMark.hmm|36_aa|+|540517|540627	0 hits	predicted protein	Unknown				ORFan
ORF587	gene_587|GeneMark.hmm|37_aa|-|541211|541324	0 hits	predicted protein	Unknown				ORFan
ORF588	gene_588|GeneMark.hmm|1581_aa|-|541395|546140	6e-06	LOW QUALITY PROTEIN: uncharacterized protein LOC100166039	Recognition		Acyrthosiphon pisum	pea aphid	Eukaryotes	1	1	25
ORF589	gene_589|GeneMark.hmm|1568_aa|-|546262|550968	0 hits	predicted protein	Unknown				ORFan	1	1	10
ORF590	gene_590|GeneMark.hmm|402_aa|-|551046|552254	4e-26	hypothetical protein	Unknown		Chrysochromulina ericina virus	unclassified Phycodnaviridae	Virus
ORF591	gene_591|GeneMark.hmm|156_aa|+|552330|552800	0.074	predicted protein	Unknown				ORFan				4
ORF592	gene_592|GeneMark.hmm|162_aa|+|552842|553330	2	predicted protein	Unknown				ORFan
ORF593	gene_593|GeneMark.hmm|255_aa|-|553327|554094	0.17	predicted protein	Unknown				ORFan				2
ORF594	gene_594|GeneMark.hmm|209_aa|-|554165|554794	1e-89	SAM-dependent methyltransferase	Translation		Chrysochromulina ericina virus	unclassified Phycodnaviridae	Virus
ORF595	gene_595|GeneMark.hmm|768_aa|+|555109|557415	0	U-box and intein containing von Willebrand factor type A	Posttranslational modification	Ubiquitination, E3	hrysochromulina ericina virus	unclassified Phycodnaviridae	Virus
ORF596	gene_596|GeneMark.hmm|81_aa|+|557525|557770	5.8	predicted protein	Unknown				ORFan
ORF597	gene_597|GeneMark.hmm|704_aa|+|557770|559884	0	heat shock 70kDa protein	Posttranslational modification	chaperone	Esox lucius	northern pike	Eukaryotes
ORF598	gene_598|GeneMark.hmm|209_aa|-|559886|560515	5e-06	hypothetical protein	Unknown		Mus caroli	Ryukyu mouse	Eukaryotes	1	1	31	1
ORF599	gene_599|GeneMark.hmm|249_aa|+|560622|561371	2e-12	putative NUDIX hydrolase	Translation		Rhodococcus coprophilus	bacteria	Bacteria
ORF600	gene_600|GeneMark.hmm|228_aa|-|561383|562069	0.006	HNH endonuclease	Virus morphogenesis		Bacteriovorax stolpii		ORFan
ORF601	gene_601|GeneMark.hmm|121_aa|+|562301|562666	6e-41	putative permease	Resistance	Ion channel	Phaeocystis globosa virus	unclassified Prymnesiovirus	Virus				4
ORF602	gene_602|GeneMark.hmm|122_aa|+|562696|563064	6e-24	hypothetical protein	Unknown		Phaeocystis globosa virus	unclassified Prymnesiovirus	Virus				3
ORF603	gene_603|GeneMark.hmm|317_aa|-|563091|564044	5e-90	Phytanoyl-CoA dioxygenase	Metabolism	Light harvesting; Chlorophyll degradation	Chrysochromulina ericina virus	unclassified Phycodnaviridae	Virus
ORF604	gene_604|GeneMark.hmm|84_aa|+|564112|564366	4.9	predicted protein	Unknown				ORFan
ORF605	gene_605|GeneMark.hmm|147_aa|-|564363|564806	8e-05	EamA-like transporter	Resistance	Ion channel	Phaeocystis globosa virus	unclassified Prymnesiovirus	Virus				5
ORF606	gene_606|GeneMark.hmm|102_aa|+|564864|565172	0.004	predicted protein	Unknown		Lactuca sativa (garden lettuce)		ORFan
ORF607	gene_607|GeneMark.hmm|212_aa|-|565169|565807	0.059	predicted protein	Unknown		Chrysochromulina ericina virus	unclassified Phycodnaviridae	ORFan
ORF608	gene_608|GeneMark.hmm|386_aa|-|565846|567006	6e-125	tRNA-Ile-lysidine synthetase	Translation		Phaeocystis globosa virus	unclassified Prymnesiovirus	Virus
ORF609	gene_609|GeneMark.hmm|32_aa|-|567016|567114	0 hits	predicted protein	Unknown				ORFan
ORF610	gene_610|GeneMark.hmm|166_aa|+|567100|567600	2e-37	DnaJ-like protein	Posttranslational modification	chaperone	Phaeocystis globosa virus	unclassified Prymnesiovirus	Virus
ORF611	gene_611|GeneMark.hmm|49_aa|+|567668|567817	1.7	predicted protein	Unknown				ORFan
ORF612	gene_612|GeneMark.hmm|84_aa|+|567822|568076	5e-36	hypothetical protein	Unknown		Phaeocystis globosa virus	unclassified Prymnesiovirus	Virus
ORF613	gene_613|GeneMark.hmm|126_aa|-|568064|568444	2e-56	VOG14608; sp|Q5UPY6|YL300_MIMIV Uncharacterized protein L300; GIY-YIG endonuclease superfamily protein	DNA repair and recombination		Chrysochromulina ericina virus	unclassified Phycodnaviridae	Virus
ORF614	gene_614|GeneMark.hmm|122_aa|-|568906|569274	1.8	predicted protein	Unknown				ORFan
ORF615	gene_615|GeneMark.hmm|72_aa|-|569353|569571	4.7	predicted protein	Unknown				ORFan
ORF616	gene_616|GeneMark.hmm|108_aa|-|569499|569825	0.87	predicted protein	Unknown				ORFan
ORF617	gene_617|GeneMark.hmm|151_aa|-|569896|570351	0.0002	VOG17623, sp|Q9Q8T2|LAP_RFVKA E3 ubiquitin-protein ligase LAP	Posttranslational modification	Ubiquitination, E3	Phaeocystis globosa virus	unclassified Prymnesiovirus	Virus				2
ORF618	gene_618|GeneMark.hmm|322_aa|-|570393|571361	2e-73	hypothetical protein	Unknown		Phaeocystis globosa virus	unclassified Prymnesiovirus	Virus
ORF619	gene_619|GeneMark.hmm|258_aa|-|571621|572397	2e-17	transmembrane BAX inhibitor motif-containing protein	resistance	Inhibition of apoptosis	Verticillium alfalfae	fungus	Eukaryotes				7
ORF620	gene_620|GeneMark.hmm|422_aa|+|572688|573956	2e-31	beta-1,3-glucan-binding protein	metabolism	Glycan modification	Lingula anatina	brachiopods	Eukaryotes	1	1	10
ORF621	gene_621|GeneMark.hmm|42_aa|+|574065|574193	7.7	predicted protein	Unknown				ORFan
ORF622	gene_622|GeneMark.hmm|41_aa|-|574196|574321	0 hits	predicted protein	Unknown				ORFan	1	1	29
ORF623	gene_623|GeneMark.hmm|99_aa|-|574296|574595	2.6	predicted protein	Unknown				ORFan
ORF624	gene_624|GeneMark.hmm|143_aa|+|574730|575161	2e-06	VOG17623, sp|Q9Q8T2|LAP_RFVKA E3 ubiquitin-protein ligase LAP	Posttranslational modification	Ubiquitination, E3	Phaeocystis globosa virus	unclassified Prymnesiovirus	Virus				2
ORF625	gene_625|GeneMark.hmm|68_aa|-|575741|575947	0.91	predicted protein	Unknown				ORFan				2
ORF626	gene_626|GeneMark.hmm|96_aa|+|576540|576830	1.8	predicted protein	Unknown				ORFan
ORF627	gene_627|GeneMark.hmm|111_aa|-|576873|577208	2e-06	hypothetical protein	Unknown		Micromonas pusilla virus 12T	unclassified Prasinovirus	Virus				3
ORF628	gene_628|GeneMark.hmm|299_aa|+|577628|578527	3e-96	site-specific DNA methyltransferase	Resistance	Restriction-modification system	Yellowstone lake mimivirus	unclassified Mimiviridae	Virus
ORF629	gene_629|GeneMark.hmm|198_aa|-|578502|579098	2e-27	hypothetical protein	Unknown		Tokyovirus A1	unclassified Marseillevirus	Virus
ORF630	gene_630|GeneMark.hmm|123_aa|+|579187|579558	1.4	predicted protein	Unknown				ORFan				3
ORF631	gene_631|GeneMark.hmm|127_aa|+|579612|579995	0.17	predicted protein	Unknown				ORFan
ORF632	gene_632|GeneMark.hmm|52_aa|+|580177|580335	0.41	predicted protein	Unknown				ORFan
ORF633	gene_633|GeneMark.hmm|68_aa|+|580498|580704	8.4	predicted protein	Unknown				ORFan
ORF634	gene_634|GeneMark.hmm|201_aa|+|580677|581282	2e-07	HNH endonuclease	Virus morphogenesis		Aquimarina sp. AD10	unclassified Aquimarina	Bacteria
ORF635	gene_635|GeneMark.hmm|92_aa|+|583009|583284	1.4	hypothetical protein	Unknown				ORFan

## Sheet: tRNA of PkV RF02
	tRNA	Bounds	tRNA	Anti	Intron Bounds	Inf
tRNA #	Begin	End	Type	Codon	Begin	End	Score	Note
------	-----	------	----	-----	-----	----	------	------
1	68074	68146	Pro	TGG	0	0	68.4
2	371433	371520	Tyr	GTA	371470	371484	65.9
3	492963	493036	Ile	TAT	0	0	67.6
4	493050	493121	Gln	TTG	0	0	69.6
5	493133	493206	Asn	GTT	0	0	69.3
6	493216	493297	Leu	TAA	0	0	72.9
7	493591	493663	Lys	TTT	0	0	77.6
8	493667	493741	Arg	TCT	0	0	57.8
9	568523	568604	Ser	GCT	0	0	73.2
10	568614	568695	Ser	TGA	0	0	76.8
11	568703	568763	Ala	TGC	0	0	38.4
12	568769	568842	Thr	TGT	0	0	56.1
13	515167	515095	Pro	TGG	0	0	68.4
14	166598	166517	Leu	CAA	0	0	64.8
15	120255	120184	Gly	TCC	0	0	60.9
16	90280	90207	Ile	TAT	0	0	67.6
17	90193	90122	Gln	TTG	0	0	69.6
18	90110	90037	Asn	GTT	0	0	69.3
19	90027	89944	Leu	TAA	0	0	65.8
20	89650	89578	Lys	TTT	0	0	77.6
21	89574	89500	Arg	TCT	0	0	73.4
22	14717	14636	Ser	GCT	0	0	73.2
23	14626	14545	Ser	TGA	0	0	76.8
24	14537	14477	Ala	TGC	0	0	38.4
25	14471	14398	Thr	TGT	0	0	56.1

## Sheet: tRNA of HeV RF02
	tRNA	Bounds	tRNA	Anti	Intron Bounds	Inf
tRNA #	Begin	End	Type	Codon	Begin	End	Score	Note
------	-----	------	----	-----	-----	----	------	------
1	491998	492071	Ile	TAT	0	0	77.0
2	492086	492160	Gln	TTG	0	0	73.7
3	492166	492239	Asn	GTT	0	0	71.0
4	492252	492333	Leu	TAA	0	0	73.5
5	502818	502890	Lys	TTT	0	0	74.6
6	502893	502970	Arg	TCT	0	0	67.8
7	90055	89982	Ile	TAT	0	0	77.0
8	89967	89893	Gln	TTG	0	0	73.7
9	89887	89814	Asn	GTT	0	0	71.0
10	89801	89720	Leu	TAA	0	0	73.5
11	79235	79163	Lys	TTT	0	0	74.6
12	79160	79083	Arg	TCT	0	0	67.8
