# Supplementary material for: Haptophyte-infecting viruses change the genome condensing proteins of dinoflagellates
Source: Commun Biol. 2025 Mar 28;8:510. doi: 10.1038/s42003-025-07905-3 (PMC11953307; doi:10.1038/s42003-025-07905-3)
Supplement: Supplementary file 4 — Supplementary Data 2 [file 42003_2025_7905_MOESM4_ESM.xlsx]

## Sheet: Replica1
Accession	Description	MW [kDa]	pI	Protein Group ID	Mascot Protein Score	# Global PSMs	# Global Pepts	# Global Uniq. Pepts	Coverage [%]	Abundance (Normalized)	Abundance (percentage)
PkVRF02_ORF313 _313	525_aa|-|286181|287758	58.1	5.1	200	1034	357	16	16	56	8.90996e+09	0.154086
P00761	Trypsin (Laboratory-Cont) OS=Sus scrofa PE=1 SV=1	24.4	7.18	56	107	115	2	2	8	7.17556e+09	0.124092
P04264	Keratin, type II cytoskeletal 1 (Contact-Cont) OS=Homo sapiens GN=KRT1 PE=1 SV=6	66	8.12	57	2613	317	41	39	49	5.20599e+09	0.0900307
P35527	Keratin, type I cytoskeletal 9 (Contact-Cont) OS=Homo sapiens GN=KRT9 PE=1 SV=3	62	5.24	191	2146	242	33	32	59	2.74807e+09	0.0475243
P13645	Keratin, type I cytoskeletal 10 (Contact-Cont) OS=Homo sapiens GN=KRT10 PE=1 SV=6	58.8	5.21	54	1812	219	30	24	46	2.68908e+09	0.0465041
XP_005768139.1	hypothetical protein EMIHUDRAFT_436736 [Emiliania huxleyi CCMP1516]	33.1	9.25	2	46	60	1	1	3	2.1369e+09	0.0369549
PkVRF02_ORF435 _435	1472_aa|-|396427|400845	170.9	8.87	25	3223	239	61	61	45	1.45733e+09	0.0252027
P35908	Keratin, type II cytoskeletal 2 epidermal (Contact-Cont) OS=Homo sapiens GN=KRT2 PE=1 SV=2	65.4	8	27	2215	189	33	31	53	1.28978e+09	0.0223051
PkVRF02_ORF287 _287	167_aa|+|267904|268407	18.3	9.79	137	843	195	12	12	82	1.13192e+09	0.0195751
PkVRF02_ORF232 _232	799_aa|-|202025|204424	90.8	6.14	3	1792	87	25	25	38	8.34029e+08	0.0144234
PkVRF02_ORF209 _209	95_aa|+|177626|177913	10.6	10.61	127	109	52	2	2	19	7.89413e+08	0.0136519
PkVRF02_ORF356 _356	190_aa|-|318877|319449	21.5	7.02	150	341	46	6	6	37	7.74573e+08	0.0133952
PkVRF02_ORF267 _267	329_aa|-|242540|243529	37.4	6.7	102	1093	89	18	18	72	7.56786e+08	0.0130876
PkVRF02_ORF371 _371	1920_aa|+|333480|339242	226.3	5.15	186	4618	170	88	88	44	7.15515e+08	0.0123739
PkVRF02_ORF204 _204	1026_aa|+|171838|174918	119.7	9.31	92	3057	160	56	56	54	7.13895e+08	0.0123459
PkVRF02_ORF290 _290	118_aa|+|269698|270054	13.4	10.62	123	122	29	2	2	24	7.01769e+08	0.0121362
PkVRF02_ORF382 _382	699_aa|-|347311|349410	83.5	4.61	105	1317	78	29	29	34	6.31429e+08	0.0109197
PkVRF02_ORF394 _394	252_aa|+|357313|358071	28.6	7.23	80	665	62	12	12	48	5.5124e+08	0.00953297
PkVRF02_ORF483 _483	970_aa|+|455265|458177	112	9.09	194	2117	101	37	37	39	5.20238e+08	0.00899683
PkVRF02_ORF268 _268	292_aa|-|243583|244461	33.3	9.13	170	788	106	12	12	52	5.12452e+08	0.00886218
PkVRF02_ORF175 _175	770_aa|+|147470|149782	83.5	5.55	62	1421	66	25	25	37	4.85344e+08	0.00839338
PkVRF02_ORF401 _401	608_aa|+|360896|362722	68.3	8.56	136	1438	85	24	24	50	4.56594e+08	0.00789619
PkVRF02_ORF234 _234	492_aa|-|204765|206243	57.4	5.24	10	1070	54	21	21	50	4.51635e+08	0.00781044
PkVRF02_ORF145 _145	124_aa|+|119768|120142	14.5	10.62	171	460	39	10	10	50	4.16343e+08	0.0072001
PkVRF02_ORF414 _414	102_aa|+|371054|371362	11.9	10.7	188	148	166	3	3	27	4.15301e+08	0.00718209
PkVRF02_ORF169 _169	138_aa|-|140405|140821	16	8.29	12	295	30	5	5	38	4.09069e+08	0.00707431
PkVRF02_ORF138 _138	844_aa|-|112635|115169	98.4	8.48	7	2692	108	53	53	59	4.01548e+08	0.00694425
PkVRF02_ORF211 _211	2122_aa|-|178444|184812	250.2	5.1	43	2865	112	59	58	29	3.83502e+08	0.00663216
PkVRF02_ORF522 _522	106_aa|+|491185|491505	10.9	11.96	4	107	45	2	2	8	3.81247e+08	0.00659317
PkVRF02_ORF349 _349	147_aa|+|314454|314897	16.7	8.25	112	314	40	6	6	47	3.52391e+08	0.00609415
PkVRF02_ORF85 _85	112_aa|+|72953|73291	13.3	9.91	174	348	42	6	6	57	3.52347e+08	0.00609338
PkVRF02_ORF524 _524	255_aa|+|491856|492623	25.2	10.15	122	564	28	9	9	38	3.40347e+08	0.00588586
PkVRF02_ORF327 _327	302_aa|+|295765|296673	35.8	9.98	100	693	65	14	14	37	3.38908e+08	0.00586097
PkVRF02_ORF238 _238	1461_aa|-|208346|212731	168.6	5.33	128	2300	96	43	43	32	3.36222e+08	0.00581451
PkVRF02_ORF214 _214	169_aa|-|185982|186491	18.5	8.7	74	349	47	5	5	29	3.21984e+08	0.00556829
PkVRF02_ORF123 _123	245_aa|+|101747|102484	27.1	5.16	126	165	65	3	3	14	3.19434e+08	0.00552418
PkVRF02_ORF404 _404	166_aa|+|363766|364266	19.4	9.23	155	636	39	12	12	81	2.89458e+08	0.00500579
PkVRF02_ORF132 _132	164_aa|+|109274|109768	19	8.4	52	491	29	8	8	54	2.88648e+08	0.00499179
PkVRF02_ORF245 _245	1511_aa|-|215730|220265	173.1	6.7	19	1965	82	37	37	29	2.86604e+08	0.00495644
PkVRF02_ORF147 _147	249_aa|-|121057|121806	27.6	7.2	187	814	43	13	13	55	282323172	0.00488241
PkVRF02_ORF273 _273	1347_aa|+|248008|252051	158.7	6.04	135	2372	86	49	49	42	2.69295e+08	0.0046571
PkVRF02_ORF67 _67	447_aa|-|56397|57740	51.2	6.93	201	1279	61	24	24	51	2.67098e+08	0.0046191
PkVRF02_ORF70 _70	84_aa|-|60237|60491	9.8	10.54	141	368	27	8	8	63	2.57868e+08	0.00445949
PkVRF02_ORF456 _456	310_aa|+|417040|417972	36.2	9.63	134	907	41	19	19	57	2.54394e+08	0.00439942
PkVRF02_ORF453 _453	86_aa|-|414513|414773	9	8.62	9	242	51	5	5	35	2.47595e+08	0.00428183
PkVRF02_ORF376 _376	459_aa|+|342396|343775	52.7	4.78	45	401	34	6	6	15	243434379	0.00420988
PkVRF02_ORF357 _357	282_aa|-|319519|320367	33	5.1	111	603	34	10	10	42	2.22508e+08	0.00384799
PkVRF02_ORF277 _277	1216_aa|+|253952|257602	141.4	8.51	190	1580	59	33	33	30	2.18541e+08	0.00377938
PkVRF02_ORF321 _321	268_aa|-|291792|292598	31.9	8.4	148	683	26	15	15	59	2.17339e+08	0.00375858
PkVRF02_ORF174 _174	697_aa|+|145300|147393	81.6	5.14	21	1253	41	22	22	35	2.13046e+08	0.00368435
PkVRF02_ORF283 _283	257_aa|+|261401|262174	29.1	6.55	160	416	18	6	6	31	2.09144e+08	0.00361688
PkVRF02_ORF236 _236	332_aa|-|206595|207593	38.8	7.24	41	795	34	13	13	45	2.05793e+08	0.00355892
PkVRF02_ORF434 _434	1339_aa|-|392356|396375	156.7	8.24	176	1603	63	36	36	26	2.01283e+08	0.00348092
PkVRF02_ORF281 _281	267_aa|-|260215|261018	30.8	9.64	90	494	31	9	9	31	1.97665e+08	0.00341835
PkVRF02_ORF455 _455	364_aa|+|415900|416994	40.8	9.73	6	497	20	10	10	31	1.97602e+08	0.00341727
PkVRF02_ORF195 _195	269_aa|+|163891|164700	30.7	7.18	75	444	26	8	8	29	1.94563e+08	0.00336471
PkVRF02_ORF436 _436	507_aa|+|400902|402425	59.4	9.61	131	978	49	20	20	39	1.83493e+08	0.00317327
PkVRF02_ORF155 _155	327_aa|+|126850|127833	39	8.13	42	860	37	18	18	54	1.81488e+08	0.0031386
PkVRF02_ORF451 _451	399_aa|+|411814|413013	46.3	8.1	82	801	33	16	16	46	1.76826e+08	0.00305797
PkVRF02_ORF84 _84	1116_aa|-|69529|72879	129.7	9	140	1688	52	36	36	29	1.70262e+08	0.00294446
PkVRF02_ORF325 _325	208_aa|-|294508|295134	24.8	10.04	86	456	22	10	10	34	1.66178e+08	0.00287383
PkVRF02_ORF255 _255	264_aa|+|228166|228960	32.6	10.33	172	452	68	10	10	42	1.64452e+08	0.00284398
PkVRF02_ORF158 _158	745_aa|+|129122|131359	89.5	9.06	173	889	34	23	23	33	1.61709e+08	0.00279654
PkVRF02_ORF230 _230	280_aa|-|200846|201688	33	7.9	106	242	22	7	7	27	1.56318e+08	0.00270331
PkVRF02_ORF496 _496	130_aa|+|469386|469778	14.2	10.13	33	199	12	4	4	42	1.53174e+08	0.00264894
PkVRF02_ORF481 _481	329_aa|-|453246|454235	38.6	7.9	182	542	33	10	10	39	1.4403e+08	0.00249082
PkVRF02_ORF361 _361	371_aa|+|323740|324855	43.2	6.46	29	796	27	14	14	37	1.39318e+08	0.00240932
PkVRF02_ORF140 _140	108_aa|+|116501|116827	11.4	9.8	193	146	12	2	2	31	1.3809e+08	0.00238808
PkVRF02_ORF399 _399	166_aa|+|360140|360640	19.6	6.73	130	195	17	4	4	25	1.33737e+08	0.00231281
PkVRF02_ORF266 _266	973_aa|-|239553|242474	113	7.58	162	728	14	12	12	15	1.32504e+08	0.00229148
PkVRF02_ORF146 _146	222_aa|-|120329|120997	26	5.5	15	463	24	9	9	53	1.30271e+08	0.00225286
PkVRF02_ORF148 _148	360_aa|+|121898|122980	43.4	9.63	98	600	34	13	13	31	1.19134e+08	0.00206026
PkVRF02_ORF307 _307	286_aa|-|282433|283293	34	9.94	53	459	24	11	11	39	1.18003e+08	0.0020407
PkVRF02_ORF156 _156	208_aa|-|127889|128515	24.5	5.47	149	481	23	8	8	49	1.16168e+08	0.00200897
PkVRF02_ORF396 _396	216_aa|+|358675|359325	25.2	8.25	87	364	20	6	6	29	1.11919e+08	0.00193549
PkVRF02_ORF157 _157	161_aa|+|128596|129081	18.9	9.67	101	328	13	6	6	33	111883286	0.00193487
PkVRF02_ORF233 _233	74_aa|-|204512|204736	8.4	9.91	18	181	11	3	3	47	108392783	0.00187451
PkVRF02_ORF452 _452	455_aa|+|413077|414444	53.5	9.44	116	699	34	16	16	43	1.06598e+08	0.00184348
PkVRF02_ORF75 _75	452_aa|+|62039|63397	52.4	9.01	32	794	24	16	16	35	1.04562e+08	0.00180826
PkVRF02_ORF450 _450	563_aa|-|410030|411721	66.2	5.95	184	941	33	17	17	37	1.02174e+08	0.00176696
PkVRF02_ORF151 _151	332_aa|+|124046|125044	38.8	9.35	28	544	24	12	12	48	1.00103e+08	0.00173116
PkVRF02_ORF289 _289	120_aa|+|269281|269643	13.4	10.4	61	402	17	6	6	58	9.91834e+07	0.00171525
PkVRF02_ORF76 _76	210_aa|-|63399|64031	23.8	9.47	66	347	20	6	6	30	9.81382e+07	0.00169717
PkVRF02_ORF237 _237	209_aa|-|207641|208270	24.9	6.6	48	321	17	7	7	31	9.16345e+07	0.0015847
PkVRF02_ORF45 _45	156_aa|-|30440|30910	18.6	9.33	165	204	11	4	4	25	87483565	0.00151291
PkVRF02_ORF213 _213	196_aa|-|185356|185946	22.9	8.78	144	445	26	10	10	48	8.72565e+07	0.00150899
PkVRF02_ORF97 _97	225_aa|+|82526|83203	25.5	9.39	197	339	27	7	7	51	8.10992e+07	0.0014025
PkVRF02_ORF588 _588	1581_aa|-|541395|546140	176.4	4.82	13	1016	26	19	19	15	7.78181e+07	0.00134576
PkVRF02_ORF48 _48	1556_aa|+|37100|41770	173.7	4.81	13	1016	26	19	19	15	7.78181e+07	0.00134576
PkVRF02_ORF142 _142	160_aa|+|117786|118268	18.5	8.37	198	676	25	11	11	59	7.56331e+07	0.00130797
PkVRF02_ORF379 _379	158_aa|+|344839|345315	18.8	5.4	37	250	18	5	5	36	7.53385e+07	0.00130288
PkVRF02_ORF352 _352	119_aa|-|316238|316597	13.8	9	154	124	16	3	3	24	7.50989e+07	0.00129874
PkVRF02_ORF83 _83	213_aa|-|68827|69468	25.9	9.85	152	460	17	10	10	40	7.49299e+07	0.00129581
PkVRF02_ORF439 _439	284_aa|+|403612|404466	33.5	9.77	185	360	17	9	9	31	7.47092e+07	0.001292
PkVRF02_ORF403 _403	163_aa|-|363232|363723	18.2	7.17	58	230	22	4	4	29	7.30457e+07	0.00126323
PkVRF02_ORF433 _433	344_aa|+|391272|392306	40.3	5.39	46	373	16	7	7	29	7.27611e+07	0.00125831
PkVRF02_ORF202 _202	248_aa|-|170497|171243	29.3	9.63	145	307	23	6	6	21	6.87781e+07	0.00118943
PkVRF02_ORF274 _274	159_aa|+|252142|252621	18.4	5.24	97	337	10	6	6	38	6.72064e+07	0.00116225
O77727	Keratin, type I cytoskeletal 15 (Contact-Cont) OS=Ovis aries GN=KRT15 PE=2 SV=1	48.7	4.79	76	348	28	6	1	9	64664460	0.00111829
PkVRF02_ORF184 _184	316_aa|+|157972|158922	36.9	6.02	169	372	16	6	6	26	6.21171e+07	0.00107423
PkVRF02_ORF424 _424	242_aa|-|376560|377288	29	9.19	11	374	10	8	8	27	6.12329e+07	0.00105894
PkVRF02_ORF252 _252	178_aa|+|226063|226599	19.8	5.5	153	372	14	6	6	38	6.08545e+07	0.0010524
PkVRF02_ORF323 _323	352_aa|+|293128|294186	41.1	6.24	23	302	13	6	6	21	5.83023e+07	0.00100826
PkVRF02_ORF467 _467	3037_aa|-|425803|434916	350.5	4.86	107	1208	30	24	24	9	5.74326e+07	0.000993221
PkVRF02_ORF44 _44	162_aa|-|29910|30398	18.9	10.01	161	317	12	8	8	33	5.56806e+07	0.000962923
PkVRF02_ORF87 _87	367_aa|+|73772|74875	41	4.7	69	297	13	5	5	21	5.34436e+07	0.000924237
PkVRF02_ORF176 _176	466_aa|+|149838|151238	56	8.72	64	560	17	14	14	27	5.01225e+07	0.000866803
PkVRF02_ORF351 _351	255_aa|+|315349|316116	29	5.86	113	648	16	10	10	38	4.83846e+07	0.000836747
PkVRF02_ORF226 _226	123_aa|-|195486|195857	15	7.15	31	201	9	3	3	24	4.66516e+07	0.000806778
PkVRF02_ORF183 _183	211_aa|-|157262|157897	24.1	4.97	202	317	14	6	6	16	4.48293e+07	0.000775264
PkVRF02_ORF144 _144	226_aa|+|119071|119751	26.2	8.46	65	210	9	3	3	11	4.45889e+07	0.000771106
PkVRF02_ORF218 _218	83_aa|+|188570|188821	9.8	10.08	59	220	9	4	4	53	42738602	0.000739108
PkVRF02_ORF225 _225	257_aa|-|194645|195418	29.9	4.35	157	218	7	6	6	36	3.85892e+07	0.000667349
PkVRF02_ORF46 _46	402_aa|+|30986|32194	46.7	5.31	85	496	11	10	10	25	3.83683e+07	0.00066353
PkVRF02_ORF319 _319	168_aa|-|290982|291488	20.2	9.23	14	341	10	7	7	27	3.80255e+07	0.000657602
PkVRF02_ORF444 _444	162_aa|+|407239|407727	18.3	10.84	109	152	8	3	3	23	3.78591e+07	0.000654724
PkVRF02_ORF440 _440	440_aa|+|404508|405830	52.3	9.45	118	398	25	11	11	21	3.6712e+07	0.000634887
PkVRF02_ORF378 _378	195_aa|-|344145|344732	23.4	9.96	179	181	11	5	5	19	3.6658e+07	0.000633953
PkVRF02_ORF134 _134	389_aa|+|110282|111451	46.2	9.86	163	409	14	7	7	20	3.65184e+07	0.000631537
PkVRF02_ORF241 _241	77_aa|-|213618|213851	9.1	8.7	79	161	8	3	3	39	3.52869e+07	0.000610241
PkVRF02_ORF10 gene_10	96_aa|-|6411|6701	11.5	10.89	22	63	6	2	2	24	34645691	0.000599152
PkVRF02_ORF318 _318	92_aa|-|290664|290942	10.4	9.6	50	116	10	3	3	27	34607458	0.000598491
PkVRF02_ORF428 _428	490_aa|-|380161|381633	55.2	6.65	67	333	13	5	5	12	3.26309e+07	0.000564308
PkVRF02_ORF337 _337	238_aa|-|304861|305577	26.9	9.5	39	167	5	4	4	18	3.21138e+07	0.000555366
PkVRF02_ORF392 _392	143_aa|+|356402|356833	16.9	4.68	175	142	3	2	2	11	3.19087e+07	0.00055182
PkVRF02_ORF93 _93	503_aa|+|78304|79815	59.2	8.66	164	292	10	7	7	14	3.19053e+07	0.000551761
PkVRF02_ORF413 _413	204_aa|-|370338|370952	23	5.31	5	201	7	4	4	25	3.00497e+07	0.000519671
PkVRF02_ORF441 _441	101_aa|-|405832|406137	12.2	10.49	115	141	9	3	3	26	2.95094e+07	0.000510326
PkVRF02_ORF34 _34	122_aa|-|20176|20544	14.3	9.67	110	83	7	2	2	17	2.80106e+07	0.000484406
PkVRF02_ORF320 _320	92_aa|-|291511|291789	10.9	5.36	71	194	5	5	5	48	2.58892e+07	0.00044772
PkVRF02_ORF269 _269	474_aa|-|244517|245941	55.6	8.62	147	434	14	7	7	20	2.48096e+07	0.00042905
PkVRF02_ORF104 _104	130_aa|+|88677|89069	15.2	9.7	35	176	7	4	4	22	2.23827e+07	0.000387079
PkVRF02_ORF395 _395	164_aa|+|358096|358590	19.5	9.69	189	65	5	2	2	13	2.13283e+07	0.000368845
PkVRF02_ORF253 _253	301_aa|+|226657|227562	34	7.9	177	202	7	4	4	14	2.09555e+07	0.000362399
PkVRF02_ORF468 _468	400_aa|-|435052|436254	46.2	5.07	117	334	8	6	6	17	1.88718e+07	0.000326363
PkVRF02_ORF442 _442	190_aa|+|406179|406751	22.4	9.47	129	269	8	6	6	34	1.82103e+07	0.000314923
PkVRF02_ORF473 _473	1312_aa|-|444806|448744	139.6	4.39	91	264	7	4	4	5	1.47006e+07	0.000254227
PkVRF02_ORF251 _251	158_aa|+|225494|225970	18.2	8.43	38	224	6	5	5	34	14004243	0.000242185
PkVRF02_ORF491 _491	217_aa|+|466553|467206	24.1	9.51	133	81	2	1	1	6	13194961	0.00022819
PkVRF02_ORF124 _124	314_aa|-|102538|103482	35.9	8.34	77	40	4	1	1	3	1.26465e+07	0.000218705
PkVRF02_ORF254 _254	170_aa|+|227604|228116	19.9	7.05	103	215	3	3	3	24	1.25134e+07	0.000216404
PkVRF02_ORF62 _62	169_aa|-|53133|53642	19.9	9.07	121	174	5	3	3	21	1.23379e+07	0.000213368
PkVRF02_ORF55 _55	515_aa|-|46548|48095	61.3	4.93	124	265	5	5	5	12	1.17955e+07	0.000203987
PkVRF02_ORF284 _284	427_aa|-|262179|263462	49.8	9.33	51	327	9	7	7	17	11683624	0.000202053
PkVRF02_ORF466 _466	523_aa|+|424144|425715	57.6	4.7	63	277	5	4	4	13	1.15823e+07	0.000200301
PkVRF02_ORF328 _328	173_aa|+|296696|297217	20.6	10.23	203	133	5	4	4	17	1.11633e+07	0.000193054
PkVRF02_ORF312 _312	157_aa|-|285620|286093	18.4	6.57	94	146	10	5	5	31	1.10074e+07	0.000190359
PkVRF02_ORF393 _393	121_aa|+|356894|357259	14.4	6.18	119	185	6	4	4	43	1.01102e+07	0.000174842
XP_005776965.1	hypothetical protein EMIHUDRAFT_354368 [Emiliania huxleyi CCMP1516]	13.6	11.09	1	68	6	3	3	27	9.77749e+06	0.000169089
XP_005779770.1	hypothetical protein EMIHUDRAFT_114700 [Emiliania huxleyi CCMP1516]	17.2	7.4	1	68	6	3	3	41	9.77749e+06	0.000169089
XP_005768395.1	hypothetical protein EMIHUDRAFT_436615 [Emiliania huxleyi CCMP1516]	28.3	5.25	1	68	6	3	3	24	9.77749e+06	0.000169089
XP_005789207.1	hypothetical protein EMIHUDRAFT_63003, partial [Emiliania huxleyi CCMP1516]	9.5	7.34	1	68	6	3	3	36	9.77749e+06	0.000169089
KOO29468.1	ubiquitin [Chrysochromulina tobinii]	13.4	10.95	1	68	6	3	3	27	9.77749e+06	0.000169089
XP_005770079.1	hypothetical protein EMIHUDRAFT_118474 [Emiliania huxleyi CCMP1516]	224.3	5.33	1	68	6	3	3	1	9.77749e+06	0.000169089
XP_005764959.1	hypothetical protein EMIHUDRAFT_374268 [Emiliania huxleyi CCMP1516]	34.1	7.53	1	68	6	3	3	41	9.77749e+06	0.000169089
XP_005784641.1	hypothetical protein EMIHUDRAFT_434266 [Emiliania huxleyi CCMP1516]	18.8	9.98	1	68	6	3	3	18	9.77749e+06	0.000169089
XP_005765600.1	hypothetical protein EMIHUDRAFT_464740 [Emiliania huxleyi CCMP1516]	217	5.64	1	68	6	3	3	2	9.77749e+06	0.000169089
XP_005763036.1	hypothetical protein EMIHUDRAFT_358059 [Emiliania huxleyi CCMP1516]	17.1	7.4	1	68	6	3	3	41	9.77749e+06	0.000169089
XP_005770636.1	hypothetical protein EMIHUDRAFT_349903, partial [Emiliania huxleyi CCMP1516]	34.2	7.53	1	68	6	3	3	41	9.77749e+06	0.000169089
P02769	Serum albumin (Laboratory-Cont) OS=Bos taurus GN=ALB PE=1 SV=4	69.2	6.18	17	302	8	6	6	10	9.37326e+06	0.000162098
PkVRF02_ORF286 _286	186_aa|+|267268|267828	22.6	5.25	151	14	1	1	1	5	8829014	0.000152686
PkVRF02_ORF463 _463	337_aa|-|421859|422872	39.4	4.72	47	31	1	1	1	3	8829014	0.000152686
P01012	Ovalbumin (MW-Marker) OS=Gallus gallus GN=SERPINB14 PE=1 SV=2	42.9	5.29	159	193	4	3	3	12	8.7611e+06	0.000151512
PkVRF02_ORF350 _350	101_aa|-|314953|315258	11.2	4.36	44	39	3	2	2	23	8054776	0.000139297
PkVRF02_ORF270 _270	199_aa|-|245990|246589	22.8	9.48	93	233	7	5	5	40	7.33836e+06	0.000126907
PkVRF02_ORF322 _322	142_aa|-|292616|293044	16.9	9.5	104	108	2	2	2	20	6.64683e+06	0.000114948
PkVRF02_ORF165 _165	140_aa|-|137118|137540	16.2	12.12	99	174	4	2	2	26	5.74235e+06	9.93064e-05
PkVRF02_ORF282 _282	95_aa|+|261064|261351	10.8	9.31	114	70	1	1	1	13	5289050	9.14672e-05
PkVRF02_ORF426 _426	186_aa|-|377924|378484	21.6	4.7	36	63	3	2	2	10	4.54708e+06	7.86358e-05
PkVRF02_ORF127 _127	252_aa|-|105177|105935	30.7	9.63	49	138	3	3	3	10	4.19339e+06	7.25193e-05
KOO31832.1	hypothetical protein Ctob_010736, partial [Chrysochromulina tobinii]	106.8	5.81	55	9	1	1	1	1	3.99395e+06	6.90702e-05
PkVRF02_ORF6 gene_6	123_aa|-|3683|4054	14.5	8.85	192	127	2	2	2	16	3.91734e+06	6.77453e-05
PkVRF02_ORF178 _178	231_aa|+|152522|153217	25.7	9.74	83	56	3	3	3	13	3.7599e+06	6.50226e-05
PkVRF02_ORF129 _129	112_aa|+|106458|106796	13.1	9.89	183	71	1	1	1	12	3.74502e+06	6.47652e-05
XP_005774315.1	translation elongation factor Tu [Emiliania huxleyi CCMP1516]	41	7.91	199	46	2	1	1	2	3021721	5.22567e-05
PkVRF02_ORF476 _476	99_aa|+|450302|450601	11.5	4.92	95	53	1	1	1	11	2.94253e+06	5.08871e-05
PkVRF02_ORF431 _431	1224_aa|+|386490|390164	133.7	4.37	196	101	3	2	2	2	2.66578e+06	4.61011e-05
PkVRF02_ORF430 _430	1119_aa|+|382796|386155	119.1	4.3	196	101	3	2	2	2	2.66578e+06	4.61011e-05
PkVRF02_ORF47 _47	1568_aa|+|32272|36978	177.8	4.67	156	78	2	2	2	1	2.0907e+06	3.61559e-05
KOO28950.1	60s ribosomal protein l23a-like protein [Chrysochromulina tobinii]	16.8	10.33	132	35	1	1	1	9	1.7494e+06	3.02536e-05
PkVRF02_ORF128 _128	138_aa|-|105990|106406	16	9.48	166	96	3	2	2	14	1.36558e+06	2.3616e-05
PkVRF02_ORF235 _235	89_aa|-|206298|206567	10.8	9.28	16	60	4	2	2	30	1.36099e+06	2.35365e-05
PkVRF02_ORF167 _167	267_aa|-|139140|139943	31.1	8.97	138	40	2	2	2	6	1.23003e+06	2.12717e-05
PkVRF02_ORF28 _28	386_aa|+|16234|17394	46.1	8.05	108	24	1	1	1	2	1.03685e+06	1.7931e-05
P02663	Alpha-S2-casein (Laboratory-Cont) OS=Bos taurus GN=CSN1S2 PE=1 SV=2	26	8.43	60	55	1	1	1	5	897984	1.55295e-05
XP_005760428.1	ADP-ribosylation factor [Emiliania huxleyi CCMP1516]	20.7	6.8	125	14	1	1	1	8	692048	1.19681e-05
KOO53574.1	ADP-ribosylation factor [Chrysochromulina tobinii]	18.8	8.57	125	14	1	1	1	9	692048	1.19681e-05
PkVRF02_ORF100 _100	286_aa|+|84143|85003	33.4	4.75	96	37	1	1	1	5	672719	1.16338e-05
PkVRF02_ORF271 _271	143_aa|-|246618|247049	17.3	9.35	72	41	1	1	1	12	527292	9.11881e-06
P02668	Kappa-casein (Laboratory-Cont) OS=Bos taurus GN=CSN3 PE=1 SV=1	21.3	6.77	195	37	1	1	1	5	457004	7.90328e-06
PkVRF02_ORF475 _475	324_aa|-|449230|450204	36.1	4.84	146	51	1	1	1	9	447488	7.73872e-06
XP_005766765.1	putative actin [Emiliania huxleyi CCMP1516]	41.6	5.39	30	82	1	1	1	4	426956	7.38364e-06
XP_005780542.1	putative actin [Emiliania huxleyi CCMP1516]	33	5.67	30	82	1	1	1	5	426956	7.38364e-06
XP_005782432.1	putative actin [Emiliania huxleyi CCMP1516]	41.6	5.39	30	82	1	1	1	4	426956	7.38364e-06
XP_005788670.1	putative actin [Emiliania huxleyi CCMP1516]	28.5	5.34	30	82	1	1	1	6	426956	7.38364e-06
KOO53594.1	non-muscle actin [Chrysochromulina tobinii]	41.8	5.39	30	82	1	1	1	4	426956	7.38364e-06
XP_005768436.1	putative actin [Emiliania huxleyi CCMP1516]	41.6	5.39	30	82	1	1	1	4	426956	7.38364e-06
XP_005788759.1	actin/actin-like protein alternative [Emiliania huxleyi CCMP1516]	41.4	5.6	30	82	1	1	1	4	426956	7.38364e-06
PkVRF02_ORF616 _616	108_aa|-|569499|569825	13.1	9.38	24	35	1	1	1	9	419662	7.2575e-06
PkVRF02_ORF20 _20	105_aa|+|13412|13729	12.7	9.03	24	35	1	1	1	10	419662	7.2575e-06
P00698	Lysozyme C (MW-Marker) OS=Gallus gallus GN=LYZ PE=1 SV=1	16.2	9.07	143	83	1	1	1	11	380832	6.58599e-06
YP_277361.1	DNA-directed RNA polymerase subunit beta [Emiliania huxleyi CCMP1516] (chloroplast)	69.2	8.68	26	59	1	1	1	2	281478	4.8678e-06
AHY04313.2	DNA-directed RNA polymerase subunit beta [Chrysochromulina tobinii] (chloroplast)	70.3	7.61	26	59	1	1	1	2	281478	4.8678e-06
										5.78246e+10

## Sheet: Replica2
Accession	Description	MW [kDa]	pI	Protein Group IDs	Mascot Protein Score	# Global PSMs	# Global Pepts	# Global Uniq. Pepts	Coverage [%]	Abundance (Normalized)	Abundance (percentage)
PkVRF02_gene_313	525_aa, 286181|287758	58.1	5.1	193	1818	1436	21	21	62	3.42756e+10	0.357417
P00761	Trypsin (Laboratory-Cont) OS=Sus scrofa PE=1 SV=1	24.4	7.18	57	107	115	2	2	8	9.19967e+09	0.0959316
PkVRF02_gene_435	1472_aa, 396427|400845	170.9	8.87	23	3334	257	55	55	40	2.95552e+09	0.0308194
P13645	Keratin, type I cytoskeletal 10 (Contact-Cont) OS=Homo sapiens GN=KRT10 PE=1 SV=6	58.8	5.21	56	1692	133	24	20	43	2.38697e+09	0.0248907
PkVRF02_gene_287	167_aa, 267904|268407	18.3	9.79	135	721	61	10	10	77	2.18215e+09	0.0227549
PkVRF02_gene_204	1026_aa, 171838|174918	119.7	9.31	87	3237	192	53	53	50	2.08721e+09	0.0217648
P04264	Keratin, type II cytoskeletal 1 (Contact-Cont) OS=Homo sapiens GN=KRT1 PE=1 SV=6	66	8.12	58	1966	141	27	25	45	1.92948e+09	0.0201201
P35908	Keratin, type II cytoskeletal 2 epidermal (Contact-Cont) OS=Homo sapiens GN=KRT2 PE=1 SV=2	65.4	8	24	2072	124	29	27	62	1.82956e+09	0.0190782
PkVRF02_gene_267	329_aa, 242540|243529	37.4	6.7	100	1259	91	19	19	72	1480847962	0.0154419
PkVRF02_gene_371	1920_aa, 333480|339242	226.3	5.15	179	4778	232	80	80	44	1.42388e+09	0.0148478
PkVRF02_gene_356	190_aa, 318877|319449	21.5	7.02	147	389	33	6	6	51	1.21672e+09	0.0126876
PkVRF02_gene_232	799_aa, 202025|204424	90.8	6.14	3	1837	95	26	26	52	1.17537e+09	0.0122564
PkVRF02_gene_138	844_aa, 112635|115169	98.4	8.48	7	2918	146	49	49	62	1.05807e+09	0.0110332
PkVRF02_gene_140	108_aa, 116501|116827	11.4	9.8	186	254	90	3	3	67	959561913	0.010006
PkVRF02_gene_401	608_aa, 360896|362722	68.3	8.56	134	1646	99	25	25	54	9.45121e+08	0.00985546
PkVRF02_gene_268	292_aa, 243583|244461	33.3	9.13	166	988	70	13	13	47	9.27432e+08	0.009671
PkVRF02_gene_245	1511_aa, 215730|220265	173.1	6.7	18	2395	132	42	42	35	9.08974e+08	0.00947853
PkVRF02_gene_238	1461_aa, 208346|212731	168.6	5.33	127	2700	131	47	47	38	8.73895e+08	0.00911273
PkVRF02_gene_123	245_aa, 101747|102484	27.1	5.16	125	175	27	3	3	14	854035660	0.00890565
PkVRF02_gene_382	699_aa, 347311|349410	83.5	4.61	106	1179	76	22	22	33	8.25408e+08	0.00860712
PkVRF02_gene_211	2122_aa, 178444|184812	250.2	5.1	43	3071	144	55	54	29	805269484	0.00839713
PkVRF02_gene_349	147_aa, 314454|314897	16.7	8.25	112	352	43	5	5	44	791123164	0.00824961
PkVRF02_gene_209	95_aa, 177626|177913	10.6	10.61	126	96	18	2	2	19	782989544	0.0081648
PkVRF02_gene_273	1347_aa, 248008|252051	158.7	6.04	133	2547	127	42	42	37	7.09326e+08	0.00739666
PkVRF02_gene_234	492_aa, 204765|206243	57.4	5.24	9	1218	58	20	20	48	6.94028e+08	0.00723714
PkVRF02_gene_277	1216_aa, 253952|257602	141.4	8.51	182	2268	117	42	42	39	6.91342e+08	0.00720912
PkVRF02_gene_483	970_aa, 455265|458177	112	9.09	189	2252	101	33	33	39	6.64386e+08	0.00692803
PkVRF02_gene_281	267_aa, 260215|261018	30.8	9.64	85	640	40	11	11	34	624016409	0.00650707
PkVRF02_gene_327	302_aa, 295765|296673	35.8	9.98	98	668	51	12	12	42	565541328	0.00589731
P35527	Keratin, type I cytoskeletal 9 (Contact-Cont) OS=Homo sapiens GN=KRT9 PE=1 SV=3	62	5.24	184	1593	98	22	22	52	5.6443e+08	0.00588572
PkVRF02_gene_67	447_aa, 56397|57740	51.2	6.93	194	1113	61	19	19	49	5.5269e+08	0.0057633
PkVRF02_gene_290	118_aa, 269698|270054	13.4	10.62	122	197	21	3	3	24	521505912	0.00543812
PkVRF02_gene_214	169_aa, 185982|186491	18.5	8.7	72	287	19	4	4	24	507928218	0.00529653
PkVRF02_gene_132	164_aa, 109274|109768	19	8.4	54	786	39	11	11	68	505316241	0.0052693
PkVRF02_gene_436	507_aa, 400902|402425	59.4	9.61	130	1143	62	18	18	41	447073355	0.00466196
PkVRF02_gene_481	329_aa, 453246|454235	38.6	7.9	175	731	40	13	13	50	4.37547e+08	0.00456262
PkVRF02_gene_147	249_aa, 121057|121806	27.6	7.2	180	939	38	13	13	55	4.24994e+08	0.00443172
PkVRF02_gene_175	770_aa, 147470|149782	83.5	5.55	61	1091	63	17	17	27	4.22307e+08	0.0044037
PkVRF02_gene_404	166_aa, 363766|364266	19.4	9.23	153	757	40	12	12	81	4.13063e+08	0.0043073
PkVRF02_gene_255	264_aa, 228166|228960	32.6	10.33	168	547	37	10	10	40	4.06984e+08	0.00424392
PkVRF02_gene_394	252_aa, 357313|358071	28.6	7.23	78	560	31	9	9	42	4.05583e+08	0.00422931
PkVRF02_gene_456	310_aa, 417040|417972	36.2	9.63	132	750	40	13	13	37	3.97206e+08	0.00414196
PkVRF02_gene_453	86_aa, 414513|414773	9	8.62	8	233	51	3	3	14	3.75474e+08	0.00391533
PkVRF02_gene_174	697_aa, 145300|147393	81.6	5.14	19	1324	62	22	22	37	3.5645e+08	0.00371696
PkVRF02_gene_169	138_aa, 140405|140821	16	8.29	11	267	24	4	4	36	345916592	0.00360712
PkVRF02_gene_434	1339_aa, 392356|396375	156.7	8.24	172	1416	85	33	33	24	3.40462e+08	0.00355024
PkVRF02_gene_85	112_aa, 72953|73291	13.3	9.91	171	247	18	5	5	48	3.31545e+08	0.00345726
PkVRF02_gene_155	327_aa, 126850|127833	39	8.13	42	696	42	14	14	45	3.25842e+08	0.00339779
PkVRF02_gene_455	364_aa, 415900|416994	40.8	9.73	6	610	31	9	9	32	3.12886e+08	0.00326269
PkVRF02_gene_236	332_aa, 206595|207593	38.8	7.24	41	787	41	11	11	38	308230155	0.00321414
PkVRF02_gene_325	208_aa, 294508|295134	24.8	10.04	83	470	26	8	8	48	3.04409e+08	0.00317429
PkVRF02_gene_158	745_aa, 129122|131359	89.5	9.06	170	1147	57	21	21	30	298559904	0.0031133
PkVRF02_gene_145	124_aa, 119768|120142	14.5	10.62	167	502	38	10	10	50	2.9792e+08	0.00310662
PkVRF02_gene_97	225_aa, 82526|83203	25.5	9.39	190	336	29	5	5	32	2.8211e+08	0.00294177
PkVRF02_gene_76	210_aa, 63399|64031	23.8	9.47	67	406	18	5	5	34	271484106	0.00283096
PkVRF02_gene_283	257_aa, 261401|262174	29.1	6.55	158	484	23	7	7	37	263933231	0.00275222
PkVRF02_gene_399	166_aa, 360140|360640	19.6	6.73	129	374	27	8	8	79	261235502	0.00272409
PkVRF02_gene_321	268_aa, 291792|292598	31.9	8.4	144	726	38	15	15	48	2.60133e+08	0.0027126
PkVRF02_gene_361	371_aa, 323740|324855	43.2	6.46	27	858	50	12	12	39	2.59939e+08	0.00271057
PkVRF02_gene_451	399_aa, 411814|413013	46.3	8.1	80	832	42	14	14	40	2.59581e+08	0.00270684
PkVRF02_gene_376	459_aa, 342396|343775	52.7	4.78	46	261	14	5	5	10	2.5637e+08	0.00267335
PkVRF02_gene_357	282_aa, 319519|320367	33	5.1	111	550	28	8	8	37	244827879	0.002553
PkVRF02_gene_184	316_aa, 157972|158922	36.9	6.02	165	551	26	10	10	44	2.44177e+08	0.00254621
PkVRF02_gene_84	1116_aa, 69529|72879	129.7	9	136	1622	74	30	30	30	241036234	0.00251346
PkVRF02_gene_195	269_aa, 163891|164700	30.7	7.18	73	437	22	8	8	32	240094873	0.00250364
PkVRF02_gene_379	158_aa, 344839|345315	18.8	5.4	37	336	22	7	7	33	2.36369e+08	0.00246478
PkVRF02_gene_414	102_aa, 371054|371362	11.9	10.7	181	57	9	1	1	10	232958702	0.00242923
PkVRF02_gene_142	160_aa, 117786|118268	18.5	8.37	191	600	29	11	11	58	2.27234e+08	0.00236954
PkVRF02_gene_45	156_aa, 30440|30910	18.6	9.33	164	207	13	4	4	25	222579902	0.002321
PkVRF02_gene_450	563_aa, 410030|411721	66.2	5.95	177	1168	49	20	20	45	2.18854e+08	0.00228215
PkVRF02_gene_452	455_aa, 413077|414444	53.5	9.44	115	648	32	12	12	29	2.13728e+08	0.0022287
PkVRF02_gene_70	84_aa, 60237|60491	9.8	10.54	137	299	19	5	5	48	213432840	0.00222562
PkVRF02_gene_213	196_aa, 185356|185946	22.9	8.78	140	361	26	8	8	37	2.10503e+08	0.00219506
PkVRF02_gene_307	286_aa, 282433|283293	34	9.94	55	425	27	9	9	33	204467169	0.00213213
PkVRF02_gene_396	216_aa, 358675|359325	25.2	8.25	84	542	27	8	8	43	203949915	0.00212673
PkVRF02_gene_151	332_aa, 124046|125044	38.8	9.35	25	677	31	10	10	35	1.80174e+08	0.00187881
PkVRF02_gene_134	389_aa, 110282|111451	46.2	9.86	161	471	30	9	9	26	175888180	0.00183411
PkVRF02_gene_378	195_aa, 344145|344732	23.4	9.96	174	136	12	3	3	15	172667067	0.00180052
PkVRF02_gene_148	360_aa, 121898|122980	43.4	9.63	96	528	24	8	8	24	156101487	0.00162778
KOO25587.1	chloroplast light harvesting protein isoform 3, partial [Chrysochromulina tobinii]	6.8	5.19	79	87	10	2	2	13	1.5487e+08	0.00161494
PkVRF02_gene_10	96_aa, 6411|6701	11.5	10.89	20	101	9	3	3	30	152971092	0.00159514
PkVRF02_gene_237	209_aa, 207641|208270	24.9	6.6	48	380	21	7	7	32	1.45403e+08	0.00151622
PkVRF02_gene_289	120_aa, 269281|269643	13.4	10.4	60	434	15	5	5	44	1.4408e+08	0.00150243
PkVRF02_gene_75	452_aa, 62039|63397	52.4	9.01	32	605	26	9	9	19	136294859	0.00142124
PkVRF02_gene_403	163_aa, 363232|363723	18.2	7.17	59	136	8	2	2	17	1.36006e+08	0.00141823
PkVRF02_gene_87	367_aa, 73772|74875	41	4.7	69	512	22	6	6	33	125786649	0.00131167
PkVRF02_gene_230	280_aa, 200846|201688	33	7.9	107	147	9	3	3	9	124478040	0.00129802
PkVRF02_gene_440	440_aa, 404508|405830	52.3	9.45	117	566	40	14	14	26	1.22385e+08	0.00127619
KOO26830.1	ATP h+ mitochondrial f1 beta polypeptide [Chrysochromulina tobinii]	53.1	5.38	101	304	12	5	5	13	122319108	0.00127551
PkVRF02_gene_144	226_aa, 119071|119751	26.2	8.46	65	246	15	3	3	11	116903906	0.00121904
PkVRF02_gene_428	490_aa, 380161|381633	55.2	6.65	68	362	26	5	5	12	113143153	0.00117983
PkVRF02_gene_252	178_aa, 226063|226599	19.8	5.5	151	378	20	6	6	38	112705340	0.00117526
PkVRF02_gene_439	284_aa, 403612|404466	33.5	9.77	178	485	25	10	10	39	112600500	0.00117417
PkVRF02_gene_323	352_aa, 293128|294186	41.1	6.24	22	361	14	5	5	17	110718044	0.00115454
XP_005757765.1	ATP synthase F1 subunit alpha [Emiliania huxleyi CCMP1516]	58.5	6.48	139	103	9	2	2	4	108655334	0.00113303
PkVRF02_gene_157	161_aa, 128596|129081	18.9	9.67	99	211	16	4	4	22	1.04456e+08	0.00108923
PkVRF02_gene_424	242_aa, 376560|377288	29	9.19	10	367	22	7	7	27	104009635	0.00108458
PkVRF02_gene_433	344_aa, 391272|392306	40.3	5.39	47	412	18	6	6	31	1.02493e+08	0.00106877
PkVRF02_gene_156	208_aa, 127889|128515	24.5	5.47	146	415	19	7	7	49	95735646	0.000998305
PkVRF02_gene_274	159_aa, 252142|252621	18.4	5.24	95	243	9	4	4	33	9.3526e+07	0.000975263
PkVRF02_gene_269	474_aa, 244517|245941	55.6	8.62	143	384	19	7	7	19	8.88454e+07	0.000926455
PkVRF02_gene_146	222_aa, 120329|120997	26	5.5	13	514	25	8	8	41	8.83131e+07	0.000920904
PkVRF02_gene_83	213_aa, 68827|69468	25.9	9.85	148	363	21	7	7	30	8.80499e+07	0.000918159
PkVRF02_gene_202	248_aa, 170497|171243	29.3	9.63	141	215	13	4	4	17	8.51391e+07	0.000887807
PkVRF02_gene_46	402_aa, 30986|32194	46.7	5.31	81	476	28	10	10	27	8.47818e+07	0.000884081
PkVRF02_gene_352	119_aa, 316238|316597	13.8	9	152	209	13	4	4	43	80406387	0.000838455
PkVRF02_gene_318	92_aa, 290664|290942	10.4	9.6	52	173	9	3	3	34	78374060	0.000817263
PkVRF02_gene_34	122_aa, 20176|20544	14.3	9.67	110	68	7	1	1	9	76953654	0.000802451
PkVRF02_gene_233	74_aa, 204512|204736	8.4	9.91	17	109	6	2	2	31	66573348	0.000694208
PkVRF02_gene_93	503_aa, 78304|79815	59.2	8.66	163	151	10	4	4	8	64427943	0.000671837
PkVRF02_gene_496	130_aa, 469386|469778	14.2	10.13	33	112	5	2	2	22	63775096	0.000665029
PkVRF02_gene_176	466_aa, 149838|151238	56	8.72	63	393	19	8	8	17	62324565	0.000649903
XP_005774315.1	translation elongation factor Tu [Emiliania huxleyi CCMP1516]	41	7.91	192	98	6	2	2	5	60203324	0.000627783
PkVRF02_gene_524	255_aa, 491856|492623	25.2	10.15	121	194	9	3	3	16	56780306	0.000592089
PkVRF02_gene_226	123_aa, 195486|195857	15	7.15	31	286	9	4	4	37	51603577	0.000538108
PkVRF02_gene_444	162_aa, 407239|407727	18.3	10.84	109	123	9	3	3	25	4.60958e+07	0.000480674
KOO28834.1	hypothetical protein Ctob_014373 [Chrysochromulina tobinii]	68	5.9	21	157	6	2	2	4	42860250	0.000446935
PkVRF02_gene_351	255_aa, 315349|316116	29	5.86	113	185	12	4	4	16	4.08018e+07	0.00042547
PkVRF02_gene_44	162_aa, 29910|30398	18.9	10.01	159	141	10	4	4	24	3.98454e+07	0.000415496
PkVRF02_gene_241	77_aa, 213618|213851	9.1	8.7	77	110	8	3	3	43	3.92196e+07	0.000408972
PkVRF02_gene_225	257_aa, 194645|195418	29.9	4.35	156	193	10	4	4	21	3.86521e+07	0.000403054
PkVRF02_gene_312	157_aa, 285620|286093	18.4	6.57	91	147	8	4	3	29	3.39466e+07	0.000353985
PkVRF02_gene_183	211_aa, 157262|157897	24.1	4.97	195	162	14	3	3	6	2.77505e+07	0.000289374
PkVRF02_gene_320	92_aa, 291511|291789	10.9	5.36	71	111	6	2	2	30	27044790	0.000282016
PkVRF02_gene_350	101_aa, 314953|315258	11.2	4.36	44	89	7	3	3	52	2.68083e+07	0.000279549
PkVRF02_gene_426	186_aa, 377924|378484	21.6	4.7	36	90	6	2	2	10	26479804	0.000276124
XP_005777636.1	acetyl-CoA synthetase, partial [Emiliania huxleyi CCMP1516]	85.1	9.88	188	53	3	1	1	1	26452774	0.000275842
PkVRF02_gene_441	101_aa, 405832|406137	12.2	10.49	114	94	6	2	2	19	26090057	0.00027206
PkVRF02_gene_442	190_aa, 406179|406751	22.4	9.47	128	160	10	4	4	25	2.56386e+07	0.000267353
PkVRF02_gene_491	217_aa, 466553|467206	24.1	9.51	131	134	6	2	2	13	2.37902e+07	0.000248078
PkVRF02_gene_337	238_aa, 304861|305577	26.9	9.5	40	147	8	3	3	13	2.30625e+07	0.000240489
PkVRF02_gene_270	199_aa, 245990|246589	22.8	9.48	89	185	11	3	3	19	2.29059e+07	0.000238856
KOO27703.1	gtp-binding protein [Chrysochromulina tobinii]	66	6.18	50	73	3	1	1	3	22610634	0.000235777
PkVRF02_gene_393	121_aa, 356894|357259	14.4	6.18	119	171	7	3	3	27	2.17269e+07	0.000226562
PkVRF02_gene_413	204_aa, 370338|370952	23	5.31	5	212	6	2	2	16	17559678	0.000183107
XP_005768919.1	hypothetical protein EMIHUDRAFT_459165 [Emiliania huxleyi CCMP1516]	17.9	4.91	149	38	6	1	1	4	1.74855e+07	0.000182334
PkVRF02_gene_319	168_aa, 290982|291488	20.2	9.23	12	135	5	2	2	14	1.73142e+07	0.000180547
PkVRF02_gene_124	314_aa, 102538|103482	35.9	8.34	75	39	6	1	1	3	16121639	0.000168112
PkVRF02_gene_165	140_aa, 137118|137540	16.2	12.12	97	120	3	1	1	12	15774038	0.000164487
KOO36149.1	pentafunctional arom polypeptide [Chrysochromulina tobinii]	47.6	6.21	102	50	3	1	1	2	14227562	0.000148361
PkVRF02_gene_473	1312_aa, 444806|448744	139.6	4.39	86	121	5	2	2	2	13316063	0.000138856
O77727	Keratin, type I cytoskeletal 15 (Contact-Cont) OS=Ovis aries GN=KRT15 PE=2 SV=1	48.7	4.79	74	307	23	5	1	9	13125497	0.000136869
PkVRF02_gene_322	142_aa, 292616|293044	16.9	9.5	105	95	6	2	2	20	12784029	0.000133308
KOO21676.1	elongation factor g [Chrysochromulina tobinii]	84.5	5.43	38	102	6	2	2	2	12236308	0.000127597
PkVRF02_gene_266	973_aa, 239553|242474	113	7.58	160	174	5	3	3	4	1.21086e+07	0.000126265
XP_005765750.1	translation initiation factor IF-2 [Emiliania huxleyi CCMP1516]	60.1	4.86	92	48	4	1	1	1	1.1588e+07	0.000120836
PkVRF02_gene_254	170_aa, 227604|228116	19.9	7.05	103	88	6	2	2	11	1.075e+07	0.000112098
XP_005782443.1	secretory protein 24A [Emiliania huxleyi CCMP1516]	108.9	8.66	162	60	3	1	1	1	10734245	0.000111934
P22629	Streptavidin OS=Streptomyces avidinii OX=1895 PE=1 SV=1	18.8	8.35	64	29	3	1	1	6	9791672	0.000102105
PkVRF02_gene_466	523_aa, 424144|425715	57.6	4.7	62	45	3	1	1	2	9575251	9.9848e-05
XP_005779749.1	putative ATP-dependent protease Clp, ATPase subunit [Emiliania huxleyi CCMP1516]	39.7	5.78	185	108	3	1	1	3	8676165	9.04726e-05
PkVRF02_gene_522	106_aa, 491185|491505	10.9	11.96	4	46	3	1	1	8	8541142	8.90646e-05
KOO34665.1	aconitate hydratase 2 [Chrysochromulina tobinii]	97.3	7.77	124	53	3	1	1	2	8215149	8.56653e-05
KOO22134.1	ded1p [Chrysochromulina tobinii]	51.5	9.04	30	54	3	1	1	2	6361917	6.63403e-05
PkVRF02_gene_62	169_aa, 53133|53642	19.9	9.07	120	32	2	1	1	7	6.12091e+06	6.38272e-05
KOO52876.1	ATP-binding cassette superfamily [Chrysochromulina tobinii]	53.5	8.37	29	44	3	1	1	2	6.06104e+06	6.32029e-05
PkVRF02_gene_328	173_aa, 296696|297217	20.6	10.23	196	77	3	1	1	5	5380038	5.61015e-05
PkVRF02_gene_216	77_aa, 187875|188108	8.9	12.26	154	84	2	1	1	32	5.35732e+06	5.58647e-05
XP_005786622.1	putative Lysyl-tRNA synthetase [Emiliania huxleyi CCMP1516]	64.5	7.03	88	39	1	1	1	1	5.20373e+06	5.4263e-05
PkVRF02_gene_467	3037_aa, 425803|434916	350.5	4.86	108	59	2	1	1	0	5.19584e+06	5.41808e-05
KOO21551.1	aaa ATPase domain-containing protein [Chrysochromulina tobinii]	81.3	6.57	183	48	1	1	1	2	5021004	5.23576e-05
KOO22185.1	aspartate carbamoyltransferase, partial [Chrysochromulina tobinii]	172.6	6.48	70	62	1	1	1	1	4967904	5.18039e-05
PkVRF02_gene_47	1568_aa, 32272|36978	177.8	4.67	155	50	1	1	1	1	4469380	4.66054e-05
XP_005787774.1	succinate dehydrogenase iron-sulfur subunit, subunit B [Emiliania huxleyi CCMP1516]	29.8	8.13	45	38	1	1	1	5	4.26321e+06	4.44556e-05
PkVRF02_gene_284	427_aa, 262179|263462	49.8	9.33	53	61	2	1	1	3	337593	3.52032e-06
										9.58982e+10

## Sheet: Annotation of detected proteins
Protein ID	Annotation	pI
ORF10	predicted protein	10.89
ORF34	hypothetical protein	9.67
ORF44	predicted protein	10.01
ORF45	predicted protein	9.33
ORF46	hypothetical protein	5.31
ORF62	putative Nudix hydrolase	9.07
ORF67	hypothetical protein	6.93
ORF70	predicted protein	10.54
ORF75	putative Calcineurin-like phosphoesterase	9.01
ORF76	hypothetical protein	9.47
ORF83	hypothetical protein	9.85
ORF84	NAD-dependent DNA ligase	9
ORF85	predicted protein	9.91
ORF87	predicted protein	4.7
ORF93	protein kinase	8.66
ORF97	hypothetical protein	9.39
ORF123	hypothetical protein	5.16
ORF124	hypothetical protein	8.34
ORF132	hypothetical protein	8.4
ORF134	thiol protease	9.86
ORF138	VOG00451; sp|P04308|ETF1_VACCW Early transcription factor 70 kDa subunit	8.48
ORF140	hypothetical protein	9.8
ORF142	hypothetical protein	8.37
ORF144	Bacteriorhodopsin-like protein	8.46
ORF145	predicted protein	10.62
ORF146	hypothetical protein	5.5
ORF147	hypothetical protein	7.2
ORF148	hypothetical protein	9.63
ORF151	predicted protein	9.35
ORF155	SAM-dependent methyltransferase	8.13
ORF156	hypothetical protein	5.47
ORF157	EF-hand-containing protein	9.67
ORF158	hypothetical protein	9.06
ORF165	predicted protein	12.12
ORF169	hypothetical protein	8.29
ORF174	hypothetical protein	5.14
ORF175	predicted protein	5.55
ORF176	hypothetical protein	8.72
ORF183	hypothetical protein	4.97
ORF184	hypothetical protein	6.02
ORF195	extracellular link domain-containing protein	7.18
ORF202	hypothetical protein	9.63
ORF204	VOG00451; sp|P04308|ETF1_VACCW Early transcription factor 70 kDa subunit	9.31
ORF209	hypothetical protein	10.61
ORF211	hypothetical protein	5.1
ORF213	metal-dependent hydrolase	8.78
ORF214	hypothetical protein	8.7
ORF225	DNA-directed RNA polymerase II subunit RPB6	4.35
ORF226	DNA-directed RNA polymerase subunit M like protein	7.15
ORF230	hypothetical protein	7.9
ORF232	hypothetical protein	6.14
ORF233	predicted protein	9.91
ORF234	hypothetical protein	5.24
ORF236	hypothetical protein	7.24
ORF237	DNA-directed RNA polymerase II subunit RPB5	6.6
ORF238	DNA-directed RNA polymerase II subunit RPB2; DNA-directed RNA polymerase II subunit RPB2	5.33
ORF241	DNA-directed RNA polymerase, subunit N/RPB10; DNA-directed RNA polymerases I, II, and III subunit RPABC5	8.7
ORF245	DNA-directed RNA polymerase II subunit RPB1	6.7
ORF252	hypothetical protein	5.5
ORF254	hypothetical protein	7.05
ORF255	predicted protein	10.33
ORF266	hypothetical protein	7.58
ORF267	Concanavalin A-like lectin/glucanases	6.7
ORF268	Concanavalin A-like lectin/glucanases	9.13
ORF269	Concanavalin A-like lectin/glucanases	8.62
ORF270	HNH endonuclease	9.48
ORF273	VOG00451; sp|P04308|ETF1_VACCW Early transcription factor 70 kDa subunit	6.04
ORF274	VOG14440; sp|Q5UQW1|YL376_MIMIV Putative DNA-directed RNA polymerase subunit L376	5.24
ORF277	mRNA capping enzyme	8.51
ORF281	hypothetical protein	9.64
ORF283	hypothetical protein	6.55
ORF284	hypothetical protein	9.33
ORF287	hypothetical protein	9.79
ORF289	hypothetical protein	10.4
ORF290	predicted protein	10.62
ORF307	predicted protein	9.94
ORF312	putative ion channel domain-containing protein	6.57
ORF313	Major capsid protein MCP	5.1
ORF318	hypothetical protein	9.6
ORF319	predicted protein	9.23
ORF320	hypothetical protein	5.36
ORF321	hypothetical protein	8.4
ORF322	hypothetical protein	9.5
ORF323	hypothetical protein	6.24
ORF325	predicted protein	10.04
ORF327	class I glutamine amidotransferase-like protein	9.98
ORF328	hypothetical protein	10.23
ORF337	hypothetical protein	9.5
ORF349	Phaeocystis globosa virus; hypothetical protein (Cytochrome C biogenesis protein)	8.25
ORF350	hypothetical protein	4.36
ORF351	predicted protein	5.86
ORF352	O-antigen ligase like membrane protein	9
ORF356	hypothetical protein	7.02
ORF357	hypothetical protein	5.1
ORF361	DNA-directed RNA polymerase II subunit D	6.46
ORF371	hypothetical protein	5.15
ORF376	predicted protein	4.78
ORF378	Erv family thiol oxidoreductase	9.96
ORF379	disulfide isomerase (thioredoxin domain-containing)	5.4
ORF382	hypothetical protein	4.61
ORF393	predicted protein	6.18
ORF394	hypothetical protein	7.23
ORF396	hypothetical protein	8.25
ORF399	hypothetical protein	6.73
ORF401	hypothetical protein	8.56
ORF403	hypothetical protein	7.17
ORF404	hypothetical protein	9.23
ORF413	Outer membrane autotransporter	5.31
ORF414	DVNP domain-containing protein	10.7
ORF424	hypothetical protein	9.19
ORF426	hypothetical protein	4.7
ORF428	hypothetical protein	6.65
ORF433	hypothetical protein	5.39
ORF434	pentapeptide repeat-containing protein	8.24
ORF435	pentapeptide repeat-containing protein	8.87
ORF436	hypothetical protein	9.61
ORF439	rhodanese-like domain protein	9.77
ORF440	Amino-oxidase family protein	9.45
ORF441	hypothetical protein	10.49
ORF442	phosphoesterase PA-phosphatase related protein	9.47
ORF444	hypothetical protein	10.84
ORF450	Major capsid protein MCP2	5.95
ORF451	Phosphatidylinositol-specific phospholipase C, Y domain	8.1
ORF452	polyA polymerase catalytic subunit	9.44
ORF453	hypothetical protein	8.62
ORF455	predicted protein	9.73
ORF456	predicted protein	9.63
ORF466	hypothetical protein	4.7
ORF467	hypothetical protein	4.86
ORF473	VOG03348; REFSEQ FG-GAP repeat protein	4.39
ORF481	hypothetical protein	7.9
ORF483	predicted protein	9.09
ORF491	hypothetical protein	9.51
ORF496	putative lipoprotein outer membrane proteins with heavy-metal binding domain	10.13
ORF522	predicted protein	11.96
ORF524	predicted protein	10.15
